# Supplementary material for: Organocatalytic [4 + 2] cyclocondensation of α,β-unsaturated acyl chlorides with imines: highly enantioselective synthesis of dihydropyridinone and piperidine derivatives
Source: Royal Society of Chemistry journal article supplement (doi:10.1039/c4ob00114a), 2014-01-01
Supplement: c4ob00114a1.pdf [file c4ob00114a1.pdf]

## Supporting Information

### Organocatalytic [4 + 2] cyclocondensation of $\alpha,\beta$ -unsaturated acyl chlorides with imines: Highly enantioselective synthesis of dihydropyridinone and piperidine derivatives

Wen-Qiang Jia, Xiang-Yu Chen, Li-Hui Sun, Song Ye\*

Beijing National Laboratory for Molecular Sciences, CAS Key Laboratory of  
Molecular Recognition and Function, Institute of Chemistry, Chinese Academy of  
Sciences, Beijing 100190, China

songye@iccas.ac.cn

|                                                                        |    |
|------------------------------------------------------------------------|----|
| General Information.....                                               | 2  |
| Part I Experimental part.....                                          | 2  |
| 1. Reaction with chloral-derived imine 2a (Table 2) .....              | 2  |
| 2. Reaction with iminoester 2b (Table 3).....                          | 8  |
| 3. Reaction catalyzed by TMS-quinine (Table 4) .....                   | 15 |
| 4. Chemical transformations of the dihydropyridinones (Scheme 4) ..... | 19 |
| 5. X-ray structures of compound 7c (Figure S1) .....                   | 29 |
| Reference .....                                                        | 29 |
| Part II NMR Spectra .....                                              | 30 |
| Part III HPLC Spectra.....                                             | 62 |

## General Information

Unless otherwise indicated, all reactions were carried out under anhydrous, air-free conditions. All solvents were dried and distilled by standard procedures.  $\alpha$ ,  $\beta$ -Unsaturated acyl chlorides<sup>1</sup> and aldimines<sup>2</sup> was prepared according to the literatures.

Column chromatography was performed with silica gel 200 ~ 300 mesh. All <sup>1</sup>H NMR (300 MHz), <sup>13</sup>C NMR (75 MHz) spectra were recorded on a Bruker-DMX 300 spectrometer in CDCl<sub>3</sub>, with tetramethylsilane as an internal standard and reported in ppm ( $\delta$ ). Infrared (IR) spectra were recorded on a Nicolet 6700 spectrophotometer and reported as wavenumber (cm<sup>-1</sup>). Optical rotations were measured on AA-10R/Optical activity LTD operating at the sodium D line with a 100 mm path length cell, and reported as follows:  $[\alpha]_D^{T}$  (concentration (g/100ml), solvent).

## Part I Experimental part

### 1. Reaction with chloral-derived imine **2a** (Table 2)

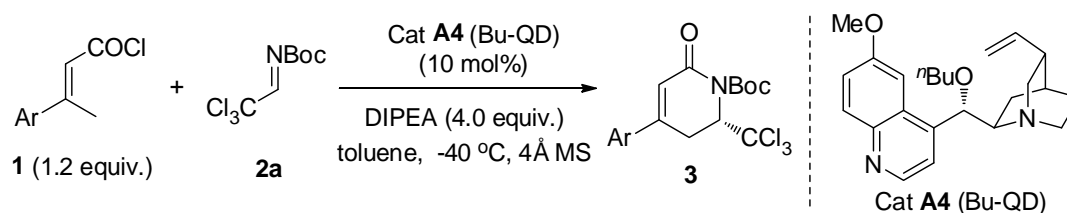

**General Procedure A.** To an oven-dried 25 mL Schlenk tube equipped with a stir bar was charged with *n*-Bu-quinidine (cat **A4**) hydrochloride salt (9.1 mg, 0.02 mmol) and 4Å MS (150 mg). This tube was closed with a septum, evacuated, and back-filled with argon. To this mixture was added freshly distilled toluene (1.0 mL) and DIPEA (0.138 mL, 0.8 mmol), then aldimines **2a** (49.3 mg, 0.2 mmol) in toluene (0.5 mL) was successively added. The mixture was cooled to -40 °C, and the solution

of acyl chloride **1** (0.24 mmol) in toluene (0.5 mL) was added. The reaction was stirred at -40 °C until the full consumption of **2a**. The mixture was diluted with ethyl acetate and passed through a short pad of silica gel. The solvent was removed under reduced pressure and the residue was purified by chromatography on silica gel (petroleum ether/ethyl acetate, 15:1) to give the desired annulation product.

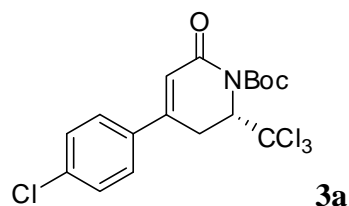

**(S)-tert-butyl-4-(4-chlorophenyl)-2-oxo-6-(trichloromethyl)-5,6-dihydropyridine-1(2H)-carboxylate (3a)**

Yield: 69.3 mg (82%), yellow solid, mp: 104-106 °C.  $R_f$  = 0.3 (petroleum ether/ethyl acetate, 10:1);  $[\alpha]_D^{25}$  -40 (*c* 1.0, CH<sub>2</sub>Cl<sub>2</sub>), HPLC analysis: >99% ee [Daicel CHIRALPAK AD-H column, 20 °C, 254 nm hexane/*i*-PrOH = 90:10, 1.0 mL /min, 12.6 min (major), - (minor)]. <sup>1</sup>H NMR (300 MHz, CDCl<sub>3</sub>) δ 7.37 (dd, *J* = 9.0, 9.0 Hz, 4H), 6.27 (s, 1H), 5.59 (d, *J* = 8.0 Hz, 1H), 3.45 (d, *J* = 19.3 Hz, 1H), 3.20 (dd, *J* = 19.2, 7.9 Hz, 1H), 1.51 (s, 9H). <sup>13</sup>C NMR (75 MHz, CDCl<sub>3</sub>) δ 162.1, 152.2, 147.9, 136.8, 134.9, 129.5, 127.5, 120.9, 102.4, 84.6, 65.3, 28.1, 27.6. IR (KBr) ν 2980, 1721, 1406, 1150, 913, 787. HRMS (ESI) *m/z*: [M+Na]<sup>+</sup> Calc. for: C<sub>17</sub>H<sub>17</sub>NO<sub>3</sub>Cl<sub>4</sub>Na, 445.98548, Found 445.98489.

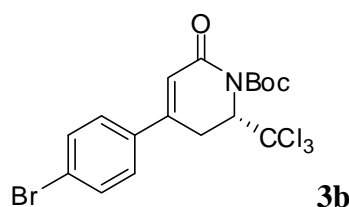

**(S)-tert-butyl-4-(4-bromophenyl)-2-oxo-6-(trichloromethyl)-5,6-dihydropyridine-1(2H)-carboxylate (3b)**

Yield: 77.5 mg (82%), orange solid, mp: 123-125 °C.  $R_f = 0.3$  (petroleum ether/ethyl acetate, 10:1);  $[\alpha]_D^{25} -38$  ( $c$  1.0,  $\text{CH}_2\text{Cl}_2$ ), HPLC analysis: >99% ee [Daicel CHIRALPAK AD-H column, 20 °C, 254 nm hexane/*i*-PrOH = 90:10, 1.0 mL /min, 13.7 min (major), - (minor)].  $^1\text{H}$  NMR (300 MHz,  $\text{CDCl}_3$ )  $\delta$  7.58 (d,  $J = 8.6$  Hz, 2H), 7.39 (d,  $J = 8.6$  Hz, 2H), 6.34 (d,  $J = 2.5$  Hz, 1H), 5.66 (d,  $J = 7.5$  Hz, 1H), 3.51 (d,  $J = 19.3$  Hz, 1H), 3.27 (ddd,  $J = 19.3, 8.0, 2.6$  Hz, 1H), 1.58 (s, 9H).  $^{13}\text{C}$  NMR (75 MHz,  $\text{CDCl}_3$ )  $\delta$  162.0, 152.2, 148.0, 135.3, 132.4, 127.7, 125.1, 120.9, 102.4, 84.6, 65.3, 28.1, 27.5. IR (KBr)  $\nu$  2979, 1721, 1489, 1293, 1150, 1008, 812. HRMS (ESI)  $m/z$ :  $[\text{M}+\text{Na}]^+$  Calc. for:  $\text{C}_{17}\text{H}_{17}\text{BrNO}_3\text{Cl}_3\text{Na}$ , 489.93496, Found 489.93489.

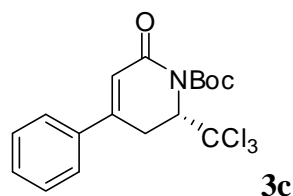

**(*S*)-tert-butyl-2-oxo-4-phenyl-6-(trichloromethyl)-5,6-dihydropyridine-1(2H)-carboxylate (3c)**

Yield: 74.1 mg (95%), yellow solid, mp: 150 - 152 °C.  $R_f = 0.3$  (petroleum ether/ethyl acetate, 10:1);  $[\alpha]_D^{25} -46.7$  ( $c$  1.0,  $\text{CH}_2\text{Cl}_2$ ), HPLC analysis: >99% ee [Daicel CHIRALPAK AD-H column, 20 °C, 254 nm hexane/*i*-PrOH = 90:10, 1.0 mL /min, 9.5 min (major), - (minor)].  $^1\text{H}$  NMR (300 MHz,  $\text{CDCl}_3$ )  $\delta$  7.46 - 7.44 (m, 2H), 7.38 - 7.35 (m, 3H), 6.27 (d,  $J = 2.4$  Hz, 1H), 5.59 (d,  $J = 7.9$  Hz, 1H), 3.49 (d,  $J = 19.4$  Hz, 1H), 3.21 (ddd,  $J = 19.4, 8.0, 2.5$  Hz, 1H), 1.50 (s, 9H).  $^{13}\text{C}$  NMR (75 MHz,  $\text{CDCl}_3$ )  $\delta$  162.3, 152.2, 149.2, 136.4, 130.5, 129.1, 126.2, 120.5, 102.4, 84.4, 65.4, 28.1, 27.6. IR (KBr)  $\nu$  2979, 1698, 1294, 1150, 763. HRMS (ESI)  $m/z$ :  $[\text{M}+\text{Na}]^+$  Calc. for:  $\text{C}_{17}\text{H}_{18}\text{NO}_3\text{Cl}_3\text{Na}$ , 412.02445, Found 412.02441.

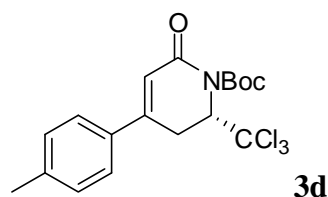

**(*S*)-tert-butyl-2-oxo-4-p-tolyl-6-(trichloromethyl)-5,6-dihydropyridine-1(2H)-carboxylate (3d)**

Yield: 53.2 mg (66%), yellow solid, mp: 132-134 °C.  $R_f$  = 0.3 (petroleum ether/ethyl acetate, 10:1);  $[\alpha]_D^{25}$  -45 ( $c$  1.2, CH<sub>2</sub>Cl<sub>2</sub>), HPLC analysis: >99% ee [Daicel CHIRALPAK AD-H column, 20 °C, 254 nm hexane/*i*-PrOH = 90:10, 1.0 mL /min, 9.9 min (major), - (minor)]. <sup>1</sup>H NMR (300 MHz, CDCl<sub>3</sub>) δ 7.36 (d,  $J$  = 7.8 Hz, 2H), 7.17 (d,  $J$  = 7.7 Hz, 2H), 6.26 (s, 1H), 5.58 (d,  $J$  = 8.0 Hz, 1H), 3.48 (d,  $J$  = 19.3 Hz, 1H), 3.19 (dd,  $J$  = 19.3, 8.0 Hz, 1H), 2.31 (s, 3H), 1.50 (s, 9H). <sup>13</sup>C NMR (75 MHz, CDCl<sub>3</sub>) δ 162.4, 152.2, 149.1, 141.1, 133.5, 129.8, 126.1, 119.6, 102.5, 84.3, 65.4, 28.1, 27.5, 21.4. IR (KBr) ν 2979, 1720, 1368, 1249, 1151, 813, 752. HRMS (ESI)  $m/z$ :  $[M+Na]^+$  Calc. for: C<sub>18</sub>H<sub>20</sub>NO<sub>3</sub>Cl<sub>3</sub>Na, 426.04010, Found 426.03995.

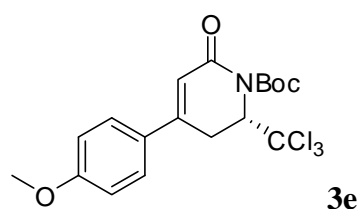

**(*S*)-tert-butyl-(4-methoxyphenyl)-2-oxo-6-(trichloromethyl)-5,6-dihydropyridine-1(2H)-carboxylate (3e)**

Yield: 73.1 mg (87%), orange solid, mp: 106-118 °C.  $R_f$  = 0.3 (petroleum ether/ethyl acetate, 10:1);  $[\alpha]_D^{25}$  -43 ( $c$  1.3, CH<sub>2</sub>Cl<sub>2</sub>), HPLC analysis: >99% ee [Daicel CHIRALPAK AD-H column, 20 °C, 254 nm hexane/*i*-PrOH = 90:10, 1.0 mL /min, 9.9 min (major), - (minor)]. <sup>1</sup>H NMR (300 MHz, CDCl<sub>3</sub>) δ 7.42 (d,  $J$  = 8.7 Hz, 2H), 6.88 (d,  $J$  = 8.7 Hz, 2H), 6.22 (d,  $J$  = 2.1 Hz, 1H), 5.57 (d,  $J$  = 7.9 Hz, 1H), 3.77 (s, 3H), 3.48 (d,  $J$  = 19.3 Hz, 1H), 3.17 (ddd,  $J$  = 19.2, 8.0, 2.2 Hz, 1H), 1.50 (s, 9H). <sup>13</sup>C

NMR (75 MHz, CDCl<sub>3</sub>)  $\delta$  162.5, 161.7, 152.2, 148.6, 128.5, 127.7, 118.5, 114.5, 102.5, 84.2, 65.4, 55.5, 28.1, 27.4. IR (KBr)  $\nu$  2980, 1723, 1369, 1224, 848, 741. HRMS (ESI)  $m/z$ : [M+Na]<sup>+</sup> Calc. for: C<sub>18</sub>H<sub>20</sub>NO<sub>4</sub>Cl<sub>3</sub>Na, 442.03501, Found 442.03485.

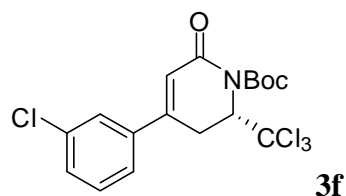

**(S)-tert-butyl-4-(3-chlorophenyl)-2-oxo-6-(trichloromethyl)-5,6-dihydropyridine-1(2H)-carboxylate (3f)**

Yield: 70.2 mg (83%), yellow solid, mp: 104-106 °C.  $R_f$  = 0.3 (petroleum ether/ethyl acetate, 10:1);  $[\alpha]_D^{25}$  -42 (*c* 1.0, CH<sub>2</sub>Cl<sub>2</sub>), HPLC analysis: 95% ee [Daicel CHIRALPAK AD-H column, 20 °C, 254 nm hexane/*i*-PrOH = 90:10, 1.0 mL /min, 8.0 min (major), 9.5 min (minor)]. <sup>1</sup>H NMR (300 MHz, CDCl<sub>3</sub>)  $\delta$  7.41-7.20 (m, 4H), 6.26 (s, 1H), 5.59 (d, *J* = 7.9 Hz, 1H), 3.43 (d, *J* = 19.4 Hz, 1H), 3.21 (ddd, *J* = 19.4, 7.9, 2.5 Hz, 1H), 1.51 (s, 9H). <sup>13</sup>C NMR (75 MHz, CDCl<sub>3</sub>)  $\delta$  161.9, 152.1, 147.7, 138.3, 135.3, 130.5, 130.4, 126.3, 124.3, 121.5, 102.3, 84.6, 65.3, 28.1, 27.6. IR (KBr)  $\nu$  2980, 1721, 1251, 1094, 787. HRMS (ESI)  $m/z$ : [M+Na]<sup>+</sup> Calc. for: C<sub>17</sub>H<sub>17</sub>NO<sub>3</sub>Cl<sub>4</sub>Na, 445.98548, Found 445.98540.

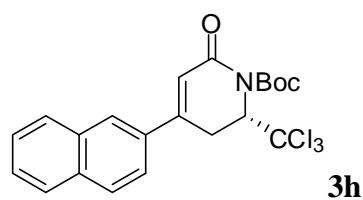

**(S)-tert-butyl-4-(naphthalen-2-yl)-2-oxo-6-(trichloromethyl)-5,6-dihydropyridine-1(2H)-carboxylate (3h)**

Yield: 76.6 mg (87%), yellow solid, mp: 164-166 °C.  $R_f$  = 0.3 (petroleum ether/ethyl acetate, 10:1);  $[\alpha]_D^{25}$  -42 (*c* 1.2, CH<sub>2</sub>Cl<sub>2</sub>), HPLC analysis: >99% ee [Daicel

CHIRALPAK IA-H column, 20 ° C, 254 nm hexane/i-PrOH = 90:10, 1.2 mL /min, 9.5 min (major), 10.8 min (minor)]. <sup>1</sup>H NMR (300 MHz, CDCl<sub>3</sub>) δ 7.90 (s, 1H), 7.82-7.76 (m, 3H), 7.55 (d, *J* = 8.6 Hz, 1H), 7.48-7.45 (m, 2H), 6.42 (d, *J* = 2.2 Hz, 1H), 5.64 (d, *J* = 7.9 Hz, 1H), 3.63 (d, *J* = 19.2 Hz, 1H), 3.31 (ddd, *J* = 19.2, 7.8, 2.4 Hz, 1H), 1.52 (s, 9H). <sup>13</sup>C NMR (75 MHz, CDCl<sub>3</sub>) δ 162.3, 152.3, 148.9, 134.2, 133.6, 133.1, 129.0, 128.8, 127.8, 127.6, 127.1, 126.2, 123.1, 120.8, 102.5, 84.5, 65.5, 28.1, 27.6. IR (KBr) ν 3480, 1700, 1307, 879, 746, 472. HRMS (ESI) *m/z*: [M+Na]<sup>+</sup> Calc. for: C<sub>21</sub>H<sub>20</sub>NO<sub>3</sub>Cl<sub>3</sub>Na, 462.04010, Found 462.04006.

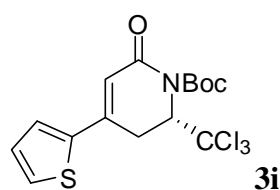

**(*S*)-tert-butyl-2-oxo-4-(thiophen-2-yl)-6-(trichloromethyl)-5,6-dihydropyridine-1(2H)-carboxylate (3i)**

Yield: 71.3 mg (90%), yellow solid, mp: 114-116 ° C. *R<sub>f</sub>* = 0.3 (petroleum ether/ethyl acetate, 10:1); [α]<sub>D</sub><sup>25</sup> -27 (*c* 1.0, CH<sub>2</sub>Cl<sub>2</sub>), HPLC analysis: >99% ee [Daicel CHIRALPAK AD-H column, 20 ° C, 254 nm hexane/i-PrOH = 90:10, 1.0 mL /min, 11.5 min (major), 13.1 min (minor)]. <sup>1</sup>H NMR (300 MHz, CDCl<sub>3</sub>) δ 7.39 (d, *J* = 4.4 Hz, 1H), 7.30 (d, *J* = 2.8 Hz, 1H), 7.05-7.03 (m, 1H), 6.25 (d, *J* = 2.1 Hz, 1H), 5.57 (d, *J* = 7.8 Hz, 1H), 3.48 (d, *J* = 19.2 Hz, 1H), 3.21 (ddd, *J* = 19.2, 8.1, 2.4 Hz 1H), 1.49 (s, 9H). <sup>13</sup>C NMR (75 MHz, CDCl<sub>3</sub>) δ 162.1, 152.0, 142.5, 140.1, 129.2, 128.5, 127.6, 117.8, 102.2, 84.3, 65.1, 28.0, 27.6. IR (KBr) ν 2979, 1720, 1622, 1294, 1224, 1150, 851, 776, 714. HRMS (ESI) *m/z*: [M+Na]<sup>+</sup> Calc. for: C<sub>15</sub>H<sub>16</sub>NO<sub>3</sub>Cl<sub>3</sub>NaS, 417.98087, Found 417.98072.

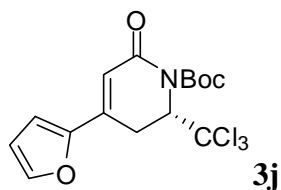

**(*S*)-tert-butyl-4-(furan-2-yl)-2-oxo-6-(trichloromethyl)-5,6-dihydropyridine-1(2H)-carboxylate (3j)**

Yield: 56.4 mg (74%), red oil.  $R_f = 0.3$  (petroleum ether/ethyl acetate, 10:1);  $[\alpha]_D^{25} -16.4$  ( $c$  0.42,  $\text{CH}_2\text{Cl}_2$ ), HPLC analysis: 98% ee [Daicel CHIRALPAK OD-H column, 20 ° C, 254 nm hexane/*i*-PrOH = 90:10, 1.5 mL /min, 5.0 min (minor), 6.2 min (major)].  $^1\text{H}$  NMR (300 MHz,  $\text{CDCl}_3$ )  $\delta$  7.48 (s, 1H), 6.70 (d,  $J = 2.9$  Hz, 1H), 6.46 (d,  $J = 1.6$  Hz, 1H), 6.31 (s, 1H), 5.57 (d,  $J = 7.4$  Hz, 1H), 3.37 (d,  $J = 19.1$  Hz, 1H), 3.11 (dd,  $J = 19.1, 8.1$  Hz, 1H), 1.49 (s, 9H).  $^{13}\text{C}$  NMR (75 MHz,  $\text{CDCl}_3$ )  $\delta$  162.3, 152.2, 150.3, 145.6, 137.5, 116.3, 112.7, 112.5, 102.2, 84.3, 65.1, 28.0, 25.2. IR (KBr)  $\nu$  3444, 2982, 1724, 1369, 1292, 1148, 813, 751. HRMS (ESI)  $m/z$ :  $[\text{M}+\text{Na}]^+$  Calc. for:  $\text{C}_{15}\text{H}_{16}\text{NO}_4\text{Cl}_3\text{Na}$ , 402.00371, Found 402.00363.

**2. Reaction with iminoester 2b (Table 3)**

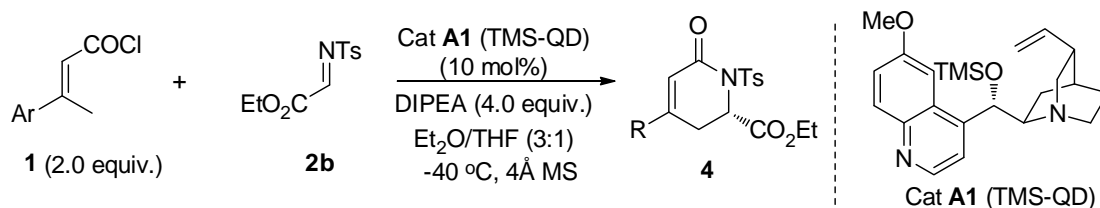

**General Procedure B.** The same as general procedure A, except using Cat **A1** (*O*-trimethylsilyl quinidine) as the catalyst and ether/THF (3:1) as the solvent.



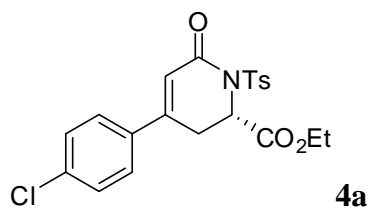

**(S)-ethyl-4-(4-chlorophenyl)-6-oxo-1-tosyl-1,2,3,6-tetrahydropyridine-2-carboxylate (4a)**

Yield: 65.8 mg (76%), white waxy solid.  $R_f = 0.3$  (petroleum ether/ethyl acetate, 3:1);  $[\alpha]_D^{25} 169.0$  ( $c$  1.0,  $\text{CH}_2\text{Cl}_2$ ), HPLC analysis: 97% ee [Daicel CHIRALPAK OD-H column, 20 ° C, 254 nm hexane /*i*-PrOH = 60:40, 0.7 mL /min, 19.8 min (minor), 26.1 min (major)].  $^1\text{H}$  NMR (300 MHz,  $\text{CDCl}_3$ )  $\delta$  8.03 (d,  $J = 8.2$  Hz, 2H), 7.39 (s, 4H), 7.33 (d,  $J = 8.1$  Hz, 2H), 6.14 (d,  $J = 2.3$  Hz, 1H), 5.53 (d,  $J = 4.7$  Hz, 1H), 4.12 (dd,  $J = 14.2, 7.0$  Hz, 2H), 3.45 (d,  $J = 16.8$  Hz, 1H), 3.19 (dd,  $J = 17.8, 3.7$  Hz, 1H), 2.44 (s, 3H), 1.10 (t,  $J = 7.1$  Hz, 3H).  $^{13}\text{C}$  NMR (75 MHz,  $\text{CDCl}_3$ )  $\delta$  169.7, 162.3, 150.6, 145.1, 136.9, 135.7, 134.5, 129.8, 129.4, 129.1, 127.6, 119.7, 62.6, 56.3, 30.7, 21.8, 14.0. IR (KBr)  $\nu$  2980, 1743, 1493, 1205, 1088, 887, 709, 655. HRMS (ESI)  $m/z$ :  $[\text{M}+\text{H}]^+$  Calc. for:  $\text{C}_{21}\text{H}_{21}\text{O}_5\text{NCIS}$ , 434.08235, Found 434.08203.

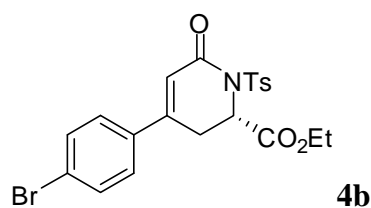

**(S)-ethyl-4-(4-bromophenyl)-6-oxo-1-tosyl-1,2,3,6-tetrahydropyridine-2-carboxylate (4b)**

Yield: 71.3 mg (75%), yellow waxy solid.  $R_f = 0.3$  (petroleum ether/ethyl acetate, 3:1);  $[\alpha]_D^{25} 126.0$  ( $c$  1.0,  $\text{CH}_2\text{Cl}_2$ ), HPLC analysis: 96% ee [Daicel CHIRALPAK OD-H column, 20 ° C, 254 nm hexane/*i*-PrOH = 70:30, 0.7 mL /min, 20.3 min (minor), 34.4 min (major)].  $^1\text{H}$  NMR (300 MHz,  $\text{CDCl}_3$ )  $\delta$  7.94 (d,  $J = 8.2$  Hz, 2H), 7.45 (d,  $J = 8.5$  Hz, 2H), 7.24 (d,  $J = 8.3$  Hz, 4H), 6.06 (d,  $J = 2.3$  Hz, 1H), 5.45 (m,

1H), 4.03 (m, 2H), 3.36 (dd,  $J = 17.6, 1.6$  Hz, 1H), 3.11 (ddd,  $J = 17.7, 6.1, 2.4$  Hz, 1H), 2.31 (d,  $J = 24.6$  Hz, 3H), 1.01 (t,  $J = 7.1$  Hz, 3H).  $^{13}\text{C}$  NMR (75 MHz,  $\text{CDCl}_3$ )  $\delta$  169.6, 162.2, 150.7, 145.0, 135.6, 135.0, 132.3, 129.8, 129.1, 127.8, 125.2, 119.7, 62.5, 56.3, 30.7, 21.7, 14.0. IR (KBr)  $\nu$  2979, 1742, 1585, 1402, 1205, 1076, 886, 710, 654. HRMS (ESI)  $m/z$ :  $[\text{M}+\text{H}]^+$  Calc. for:  $\text{C}_{21}\text{H}_{21}\text{O}_5\text{NBrS}$ , 478.03183, Found 478.03171.

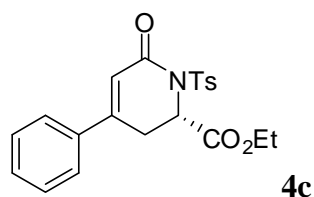

**(S)-ethyl-6-oxo-4-phenyl-1-tosyl-1,2,3,6-tetrahydropyridine-2-carboxylate (4c)**

Yield: 53.0 mg (66%), white solid, mp: 108-110 °C.  $R_f = 0.3$  (petroleum ether/ethyl acetate, 3:1);  $[\alpha]_D^{25}$  167.0 ( $c$  1.0,  $\text{CH}_2\text{Cl}_2$ ), HPLC analysis: 95% ee [Daicel CHIRALPAK OD-H column, 20 °C, 254 nm hexane/*i*-PrOH = 70:30, 0.7 mL /min, 19.7 min (minor), 23.9 min (major)].  $^1\text{H}$  NMR (300 MHz,  $\text{CDCl}_3$ )  $\delta$  7.95 (d,  $J = 8.3$  Hz, 2H), 7.35 (m, 5H), 7.23 (d,  $J = 8.3$  Hz, 2H), 6.07 (d,  $J = 2.4$  Hz, 1H), 5.45 (dd,  $J = 6.2, 1.9$  Hz, 1H), 4.22-3.83 (m, 2H), 3.41 (dd,  $J = 17.7, 1.5$  Hz, 1H), 3.11 (ddd,  $J = 17.7, 6.2, 2.4$  Hz, 1H), 2.33 (s, 3H), 1.01 (t,  $J = 7.1$  Hz, 3H).  $^{13}\text{C}$  NMR (75 MHz,  $\text{CDCl}_3$ )  $\delta$  169.7, 162.4, 151.9, 144.9, 136.1, 135.8, 130.7, 129.7, 129.0, 126.3, 119.4, 62.4, 56.3, 30.8, 21.7, 14.0. IR (KBr)  $\nu$  2981, 1744, 1596, 1354, 1167, 1015, 814, 706, 555. HRMS (ESI)  $m/z$ :  $[\text{M}+\text{H}]^+$  Calc. for:  $\text{C}_{21}\text{H}_{22}\text{O}_5\text{NS}$ , 400.12187, Found 400.12158.

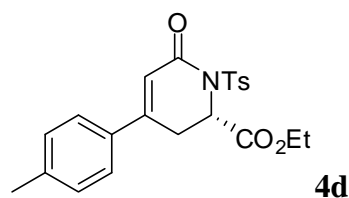

**(S)-ethyl-6-oxo-4-p-tolyl-1-tosyl-1,2,3,6-tetrahydropyridine-2-carboxylate (4d)**

Yield: 53.0 mg (64%), yellow waxy solid.  $R_f = 0.3$  (petroleum ether/ethyl acetate, 3:1);  $[\alpha]_D^{25} 154.0$  ( $c$  1.0,  $\text{CH}_2\text{Cl}_2$ ), HPLC analysis: 94% ee [Daicel CHIRALPAK OD-H column, 20 °C, 254 nm hexane/*i*-PrOH = 60:40, 0.7 mL /min, 13.8 min (minor), 16.0 min (major)].  $^1\text{H}$  NMR (300 MHz,  $\text{CDCl}_3$ )  $\delta$  7.95 (d,  $J = 8.3$  Hz, 2H), 7.28 (d,  $J = 8.2$  Hz, 2H), 7.23 (d,  $J = 8.1$  Hz, 2H), 7.12 (d,  $J = 8.1$  Hz, 2H), 6.05 (d,  $J = 2.4$  Hz, 1H), 5.44 (dd,  $J = 6.2, 1.8$  Hz, 1H), 4.11-3.90 (m, 2H), 3.41 (dd,  $J = 17.7, 1.8$  Hz, 1H), 3.08 (ddd,  $J = 17.7, 6.2, 2.5$  Hz, 1H), 2.34 (s, 3H), 2.28 (s, 3H), 1.00 (t,  $J = 7.1$  Hz, 3H).  $^{13}\text{C}$  NMR (75 MHz,  $\text{CDCl}_3$ )  $\delta$  169.8, 162.6, 151.8, 144.9, 141.2, 135.8, 133.1, 129.7, 129.0, 126.2, 118.4, 62.4, 56.3, 30.7, 21.7, 21.4, 14.0. IR (KBr)  $\nu$  2979, 1744, 1607, 1204, 1025, 816, 713, 659, 544. HRMS (ESI)  $m/z$ :  $[\text{M}+\text{H}]^+$  Calc. for:  $\text{C}_{22}\text{H}_{24}\text{O}_5\text{NS}$ , 414.13697, Found 414.13692.

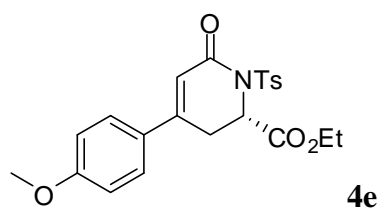

**(S)-ethyl-4-(4-methoxyphenyl)-6-oxo-1-tosyl-1,2,3,6-tetrahydropyridine-2-carboxylate (4e)**

Yield: 48.9 mg (57%), yellow waxy solid.  $R_f = 0.3$  (petroleum ether/ethyl acetate, 3:1);  $[\alpha]_D^{25} 136.0$  ( $c$  1.0,  $\text{CH}_2\text{Cl}_2$ ), HPLC analysis: 94% ee [Daicel CHIRALPAK OD-H column, 20 °C, 254 nm hexane /*i*-PrOH = 60:40, 0.7 mL /min, 20.1 min (minor), 24.3 min (major)].  $^1\text{H}$  NMR (300 MHz,  $\text{CDCl}_3$ )  $\delta$  8.03 (d,  $J = 8.4$  Hz, 2H), 7.44 (d,  $J = 8.9$  Hz, 2H), 7.32 (d,  $J = 8.3$  Hz, 2H), 6.92 (d,  $J = 8.9$  Hz, 2H), 6.10 (d,  $J = 2.4$  Hz, 1H), 5.51 (dd,  $J = 6.2, 1.9$  Hz, 1H), 4.19-3.99 (m, 2H), 3.83 (s, 3H), 3.50 (dd,  $J = 17.6, 2.0$  Hz, 1H), 3.14 (ddd,  $J = 17.6, 6.2, 2.5$  Hz, 1H), 2.43 (s, 3H), 1.09 (t,  $J = 7.1$  Hz, 3H).  $^{13}\text{C}$  NMR (75 MHz,  $\text{CDCl}_3$ )  $\delta$  169.9, 162.7, 161.8, 151.3, 144.9, 135.9, 129.8, 129.0, 128.2, 128.0, 117.2, 114.5, 62.4, 56.3, 55.5, 30.6, 21.8, 14.0. IR (KBr)  $\nu$  2977, 1743, 1514, 1353, 1166, 1030, 832, 658. HRMS (ESI)  $m/z$ :  $[\text{M}+\text{H}]^+$  Calc. for:  $\text{C}_{22}\text{H}_{24}\text{O}_6\text{NS}$ , 430.13188, Found 430.13189.

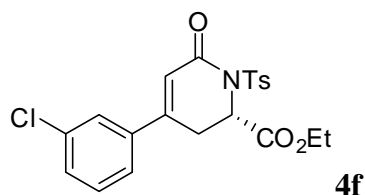

**(S)-ethyl-4-(3-chlorophenyl)-6-oxo-1-tosyl-1,2,3,6-tetrahydropyridine-2-carboxylate (4f)**

Yield: 61.3 mg (71%), yellow solid, mp: 123-125 ° C.  $R_f = 0.3$  (petroleum ether/ethyl acetate, 3:1);  $[\alpha]_D^{25} 104.0$  ( $c$  1.0,  $\text{CH}_2\text{Cl}_2$ ), HPLC analysis: 96% ee [Daicel CHIRALPAK OD-H column, 20 ° C, 254 nm hexane/*i*-PrOH = 80:20, 0.8 mL /min, 27.7 min (minor), 33.4 min (major)].  $^1\text{H}$  NMR (300 MHz,  $\text{CDCl}_3$ )  $\delta$  7.95 (d,  $J = 8.3$  Hz, 2H), 7.30 (m, 6H), 6.06 (d,  $J = 2.5$  Hz, 1H), 5.45 (dd,  $J = 6.1, 1.9$  Hz, 1H), 4.04 (m, 2H), 3.35 (dd,  $J = 17.7, 1.8$  Hz, 1H), 3.11 (ddd,  $J = 17.7, 6.1, 2.6$  Hz, 1H), 2.35 (s, 3H), 1.03 (t,  $J = 7.1$  Hz, 3H).  $^{13}\text{C}$  NMR (75 MHz,  $\text{CDCl}_3$ )  $\delta$  169.6, 162.1, 150.5, 145.1, 138.0, 135.6, 135.2, 130.6, 130.4, 129.8, 129.1, 126.4, 124.5, 120.5, 62.6, 56.3, 30.8, 21.8, 14.0. IR (KBr)  $\nu$  2962, 1743, 1355, 1028, 706, 557. HRMS (ESI)  $m/z$ :  $[\text{M}+\text{H}]^+$  Calc. for:  $\text{C}_{21}\text{H}_{21}\text{O}_5\text{NCIS}$ , 434.08235, Found 434.08200.

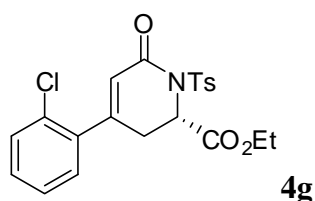

**(S)-ethyl-4-(2-chlorophenyl)-6-oxo-1-tosyl-1,2,3,6-tetrahydropyridine-2-carboxylate (4g)**

Yield: 26.6 mg (31%), yellow waxy solid.  $R_f = 0.3$  (petroleum ether/ethyl acetate, 3:1);  $[\alpha]_D^{25} 56.0$  ( $c$  1.0,  $\text{CH}_2\text{Cl}_2$ ), HPLC analysis: 89% ee [Daicel CHIRALPAK OD-H column, 20 ° C, 254 nm hexane/*i*-PrOH = 80:20, 0.5 mL /min, 30.9 min (major), 34.2 min (minor)].  $^1\text{H}$  NMR (300 MHz,  $\text{CDCl}_3$ )  $\delta$  8.03 (d,  $J = 8.4$  Hz, 1H 2H), 7.38 - 7.26 (m, 5H), 7.13 - 7.11 (m, 1H), 5.93 (d,  $J = 2.2$  Hz, 1H), 5.47 (dd,  $J = 8.0$  Hz, 2.6 Hz, 1H), 4.24 - 4.18 (m, 1H), 4.10 - 4.04 (m, 1H), 3.35-3.29 (m, 2H), 2.44 (s, 3H),

1.17 (t,  $J = 7.1$  Hz, 3H).  $^{13}\text{C}$  NMR (75 MHz,  $\text{CDCl}_3$ )  $\delta$  169.7, 162.0, 151.8, 145.1, 137.0, 135.6, 131.7, 130.6, 130.4, 129.9, 129.3, 129.1, 127.4, 124.3, 62.5, 56.5, 32.8, 21.8, 14.1. IR (KBr)  $\nu$  2982, 1745, 1596, 1311, 1088, 1101, 814, 704, 560. HRMS (ESI)  $m/z$ :  $[\text{M}+\text{H}]^+$  Calc. for:  $\text{C}_{21}\text{H}_{21}\text{O}_5\text{NCIS}$ , 434.08235, Found 434.08217.

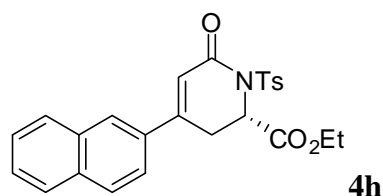

**(S)-ethyl-4-(naphthalen-2-yl)-6-oxo-1-tosyl-1,2,3,6-tetrahydropyridine-2-carboxylate (4h)**

Yield: 76.7 mg (85%), yellow solid, mp: 121-123 °C.  $R_f = 0.3$  (petroleum ether/ethyl acetate, 3:1);  $[\alpha]_{\text{D}}^{25}$  183.0 ( $c$  1.0,  $\text{CH}_2\text{Cl}_2$ ), HPLC analysis: 96% ee [Daicel CHIRALPAK AS-H column, 20 °C, 254 nm hexane/*i*-PrOH = 70:30, 1.0 mL /min, 22.2 min (minor), 32.2 min (major)].  $^1\text{H}$  NMR (300 MHz,  $\text{CDCl}_3$ )  $\delta$  8.05 (d,  $J = 8.4$  Hz, 2H), 7.93 (s, 1H), 7.89-7.82 (m, 3H), 7.57-7.54 (m, 3H), 7.34 (d,  $J = 8.2$  Hz, 2H), 6.31 (d,  $J = 2.5$  Hz, 1H), 5.58 (dd,  $J = 6.2, 1.9$  Hz, 1H), 4.17-4.05 (m, 2H), 3.66 (dd,  $J = 17.6, 1.9$  Hz, 1H), 3.30 (ddd,  $J = 17.6, 6.3, 2.5$  Hz, 1H), 2.44 (s, 3H), 1.10 (t,  $J = 7.1$  Hz, 3H).  $^{13}\text{C}$  NMR (75 MHz,  $\text{CDCl}_3$ )  $\delta$  169.9, 162.6, 151.6, 145.0, 135.9, 134.3, 133.3, 133.1, 129.9, 129.1, 129.0, 128.9, 127.8, 127.8, 127.1, 126.7, 123.1, 119.7, 62.6, 56.5, 30.9, 21.8, 14.1. IR (KBr)  $\nu$  2923, 1744, 1596, 1308, 1087, 1015, 815, 706, 554. HRMS (ESI)  $m/z$ :  $[\text{M}+\text{H}]^+$  Calc. for:  $\text{C}_{25}\text{H}_{24}\text{O}_5\text{NS}$ , 450.13697, Found 450.13672.

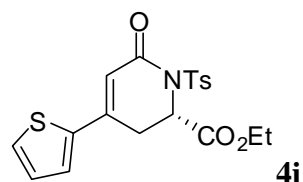

**(S)-ethyl-6-oxo-4-(thiophen-2-yl)-1-tosyl-1,2,3,6-tetrahydropyridine-2-carboxylate (4i)**

Yield: 43.7 mg (54%), white solid, mp: 143-145 °C.  $R_f = 0.3$  (petroleum ether/ethyl acetate, 3:1);  $[\alpha]_D^{25}$  76.0 ( $c$  0.25,  $\text{CH}_2\text{Cl}_2$ ), HPLC analysis: 92% ee [Daicel CHIRALPAK OD-H column, 20 °C, 254 nm hexane/*i*-PrOH = 70:30, 0.7 mL /min, 20.1 min (minor), 23.1 min (major)].  $^1\text{H}$  NMR (300 MHz,  $\text{CDCl}_3$ )  $\delta$  8.02 (d,  $J = 8.3$  Hz, 2H), 7.46 (d,  $J = 5.0$  Hz, 1H), 7.33 (t,  $J = 5.3$  Hz, 3H), 7.09 (m, 1H), 6.12 (d,  $J = 2.3$  Hz, 1H), 5.51 (dd,  $J = 6.2, 1.9$  Hz, 1H), 4.10 (m, 2H), 3.49 (dd,  $J = 17.4, 1.9$  Hz, 1H), 3.20 (ddd,  $J = 17.5, 6.2, 2.4$  Hz, 1H), 2.43 (s, 3H), 1.10 (t,  $J = 7.1$  Hz, 3H).  $^{13}\text{C}$  NMR (75 MHz,  $\text{CDCl}_3$ )  $\delta$  169.6, 162.4, 145.0, 144.9, 140.0, 135.8, 129.9, 129.8, 129.1, 128.6, 128.3, 116.5, 62.6, 56.2, 31.1, 21.8, 14.0. IR (KBr)  $\nu$  2924, 1744, 1598, 1259, 1166, 1019, 801, 663. HRMS (ESI)  $m/z$ :  $[\text{M}+\text{H}]^+$  Calc. for:  $\text{C}_{19}\text{H}_{20}\text{O}_5\text{NS}_2$ , 406.07774, Found 406.07772.

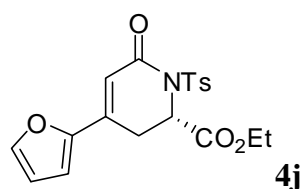

**(S)-ethyl-4-(furan-2-yl)-6-oxo-1-tosyl-1,2,3,6-tetrahydropyridine-2-carboxylate  
(4j)**

Yield: 46.6 mg (60%), red oil.  $R_f = 0.3$  (petroleum ether/ethyl acetate, 3:1);  $[\alpha]_D^{25}$  149.0 ( $c$  1.0,  $\text{CH}_2\text{Cl}_2$ ), HPLC analysis: 82% ee [Daicel CHIRALPAK OD-H column, 20 °C, 254 nm hexane/*i*-PrOH = 70:30, 0.7 mL /min, 20.2 min (minor), 24.7 min (major)].  $^1\text{H}$  NMR (300 MHz,  $\text{CDCl}_3$ )  $\delta$  8.01 (d,  $J = 8.3$  Hz, 2H), 7.53 (d,  $J = 1.1$  Hz, 1H), 7.32 (d,  $J = 8.3$  Hz, 2H), 6.73 (t,  $J = 5.6$  Hz, 1H), 6.50 (dd,  $J = 3.4, 1.7$  Hz, 1H), 6.19 (d,  $J = 2.3$  Hz, 1H), 5.50 (dd,  $J = 6.2, 1.8$  Hz, 1H), 4.15-4.02 (m, 2H), 3.35 (dd,  $J = 17.4, 1.9$  Hz, 1H), 3.11 (ddd,  $J = 17.4, 6.3, 2.4$  Hz, 1H), 2.41 (s, 3H), 1.09 (t,  $J = 7.1$  Hz, 3H).  $^{13}\text{C}$  NMR (75 MHz,  $\text{CDCl}_3$ )  $\delta$  169.6, 162.6, 150.1, 145.9, 144.9, 139.4, 135.9, 129.8, 129.1, 114.9, 113.6, 112.7, 62.5, 56.1, 28.7, 21.8, 14.0. IR (KBr)  $\nu$  2980, 1743, 1620, 1405, 1289, 1039, 922, 755, 661, 555. HRMS (ESI)  $m/z$ :  $[\text{M}+\text{H}]^+$  Calc. for:  $\text{C}_{19}\text{H}_{20}\text{O}_6\text{NS}$ , 390.10058, Found 390.10032.

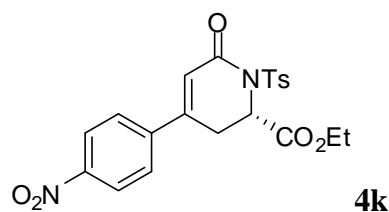

**(S)-ethyl-4-(4-nitrophenyl)-6-oxo-1-tosyl-1,2,3,6-tetrahydropyridine-2-carboxylate (4k)**

Yield: 77.2 mg (87%), yellow waxy solid.  $R_f = 0.3$  (petroleum ether/ethyl acetate, 3:1);  $[\alpha]_D^{25} 96.2$  ( $c$  4.5,  $\text{CH}_2\text{Cl}_2$ ), HPLC analysis: ee was not determined because of the failure of its separation on CHIRALPAK OD, AD, OJ, OB, AS, IA columns.  $^1\text{H}$  NMR (300 MHz,  $\text{CDCl}_3$ )  $\delta$  8.17 (d,  $J = 8.8$  Hz, 2H), 7.94 (d,  $J = 8.3$  Hz, 2H), 7.54 (d,  $J = 8.8$  Hz, 2H), 7.26 (d,  $J = 8.2$  Hz, 2H), 6.16 (d,  $J = 2.5$  Hz, 1H), 5.49 (dd,  $J = 6.0, 1.9$  Hz, 1H), 4.04 (m, 2H), 3.39 (dd,  $J = 17.7, 1.9$  Hz, 1H), 3.20 (ddd,  $J = 17.7, 6.1, 2.6$  Hz, 1H), 2.33 (d,  $J = 17.2$  Hz, 3H), 1.03 (t,  $J = 7.1$  Hz, 3H).  $^{13}\text{C}$  NMR (75 MHz,  $\text{CDCl}_3$ )  $\delta$  169.5, 161.7, 149.5, 148.8, 145.3, 142.3, 135.4, 129.8, 129.1, 127.3, 124.2, 122.4, 62.7, 56.2, 30.8, 21.8, 14.0. IR (KBr)  $\nu$  2981, 1689, 1521, 1206, 1087, 851, 556. HRMS (ESI)  $m/z$ :  $[\text{M}+\text{Na}]^+$  Calc. for:  $\text{C}_{21}\text{H}_{20}\text{O}_7\text{N}_2\text{NaS}$ , 467.08834, Found 467.08762.

**3. Reaction catalyzed by TMS-quinine (Table 4)**

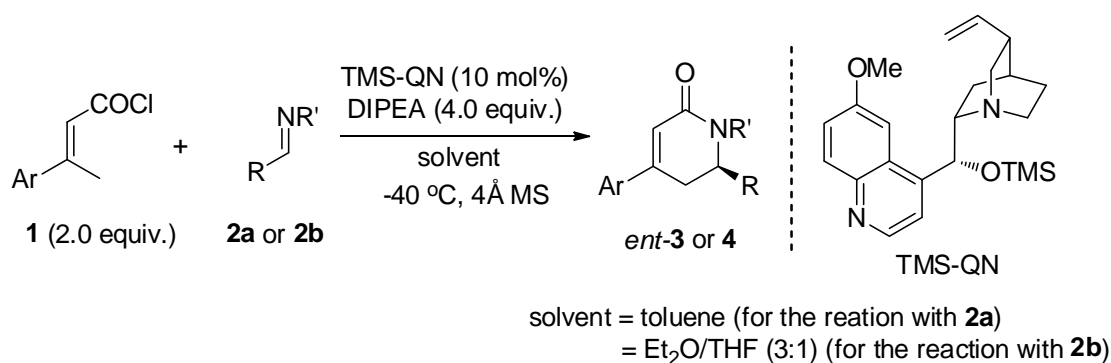

**General Procedure:** The same as procedure **A** for the reaction with imine **2a** or procedure **B** for the reaction with **2b** except using *O*-trimethylsilyl quinine as the

catalyst.

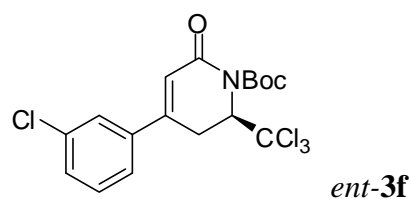

**(*R*)-tert-butyl-4-(3-chlorophenyl)-2-oxo-6-(trichloromethyl)-5,6-dihydropyridine-1(2H)-carboxylate (*ent-3f*)**

Yield: 55.2 mg (65%), yellow solid, mp: 102-104 °C.  $R_f = 0.3$  (petroleum ether/ethyl acetate, 10:1);  $[\alpha]_D^{25} 42$  ( $c$  1.0,  $\text{CH}_2\text{Cl}_2$ ), HPLC analysis: 99% ee [Daicel CHIRALPAK AD-H column, 20 °C, 254 nm hexane/*i*-PrOH = 90:10, 1.0 mL /min, 8.0 min (minor), 9.5 min (major)].

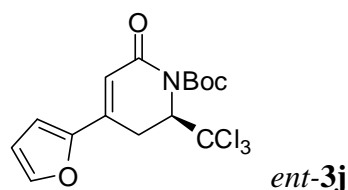

**(*R*)-tert-butyl-4-(furan-2-yl)-2-oxo-6-(trichloromethyl)-5,6-dihydropyridine-1(2H)-carboxylate (*ent-3j*)**

Yield: 54.0 mg (71%), red oil.  $R_f = 0.3$  (petroleum ether/ethyl acetate, 10:1);  $[\alpha]_D^{25} 21.6$  ( $c$  0.37,  $\text{CH}_2\text{Cl}_2$ ), HPLC analysis: 98% ee [Daicel CHIRALPAK OD-H column, 20 °C, 254 nm hexane/*i*-PrOH = 90:10, 1.5 mL /min, 5.0 min (major), 6.3 min (minor)].

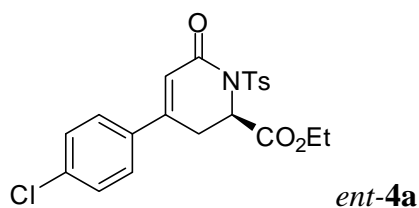

**(*R*)-ethyl-4-(4-chlorophenyl)-6-oxo-1-tosyl-1,2,3,6-tetrahydropyridine-2-carboxylate**



**ate (*ent*-4a)**

Yield: 46.2 mg (52%), yellow waxy solid.  $R_f = 0.3$  (petroleum ether/ethyl acetate, 3:1);  $[\alpha]_D^{25} -90.0$  ( $c$  1.0,  $\text{CH}_2\text{Cl}_2$ ), HPLC analysis: 94% ee [Daicel CHIRALPAK OD-H column, 20 °C, 254 nm hexane /*i*-PrOH = 60:40, 0.7 mL /min, 18.6 min (major), 25.7 min (minor)].

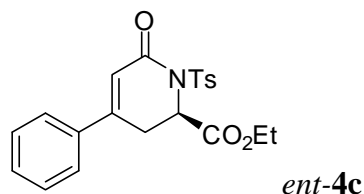

**(*R*)-ethyl 6-oxo-4-phenyl-1-tosyl-1,2,3,6-tetrahydropyridine-2-carboxylate**  
**(*ent*-4c)**

Yield: 38.2 mg (48%), yellow waxy solid.  $R_f = 0.3$  (petroleum ether/ethyl acetate, 3:1);  $[\alpha]_D^{25} -142$  ( $c$  1.0,  $\text{CH}_2\text{Cl}_2$ ), HPLC analysis: 94% ee [Daicel CHIRALPAK OD-H column, 20 °C, 254 nm hexane/*i*-PrOH = 70:30, 0.7 mL /min, 17.4 min (major), 21.9 min (minor)].

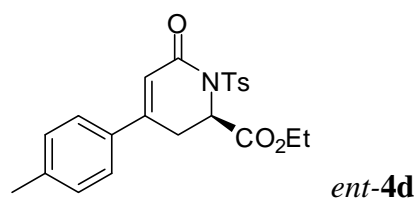

**(*R*)-ethyl 6-oxo-4-p-tolyl-1-tosyl-1,2,3,6-tetrahydropyridine-2-carboxylate**  
**(*ent*-4d)**

Yield: 41.5 mg (50%), yellow waxy solid.  $R_f = 0.3$  (petroleum ether/ethyl acetate, 3:1);  $[\alpha]_D^{25} -141.0$  ( $c$  1.0,  $\text{CH}_2\text{Cl}_2$ ), HPLC analysis: 93% ee [Daicel CHIRALPAK OD-H column, 20 °C, 254 nm hexane/*i*-PrOH = 60:40, 0.7 mL /min, 13.4 min (major), 16.2 min (minor)].

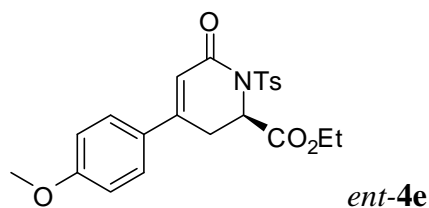

**(R)-ethyl-4-(4-methoxyphenyl)-6-oxo-1-tosyl-1,2,3,6-tetrahydropyridine-2-carboxylate (*ent-4e*)**

Yield: 37.7 mg (44%), yellow solid, mp: 120-122 °C.  $R_f = 0.3$  (petroleum ether/ethyl acetate, 3:1);  $[\alpha]_D^{25} -162.0$  ( $c$  1.0,  $\text{CH}_2\text{Cl}_2$ ), HPLC analysis: 92% ee [Daicel CHIRALPAK OD-H column, 20 °C, 254 nm hexane /*i*-PrOH = 60:40, 0.7 mL /min, 19.6 min (major), 25.2min (minor)].

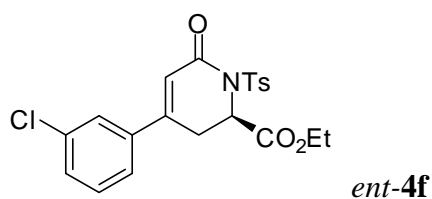

**(R)-ethyl-4-(3-chlorophenyl)-6-oxo-1-tosyl-1,2,3,6-tetrahydropyridine-2-carboxylate (*ent-4f*)**

Yield: 57.0 mg (67%), yellow solid, mp: 130-132 °C.  $R_f = 0.3$  (petroleum ether/ethyl acetate, 3:1);  $[\alpha]_D^{25} -136.0$  ( $c$  1.0,  $\text{CH}_2\text{Cl}_2$ ), HPLC analysis: 96% ee [Daicel CHIRALPAK OD-H column, 20 °C, 254 nm hexane/*i*-PrOH = 80:20, 0.8 mL /min, 26.3 min (major), 33.2min (minor)].

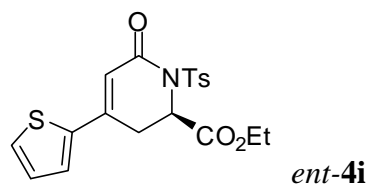

**(R)-ethyl-6-oxo-4-(thiophen-2-yl)-1-tosyl-1,2,3,6-tetrahydropyridine-2-carboxylate (*ent-4i*)**

Yield: 38.2 mg (47%), white solid, mp: 131-133 °C.  $R_f = 0.3$  (petroleum ether/ethyl acetate, 3:1);  $[\alpha]_D^{25} -107.0$  ( $c$  1.0,  $\text{CH}_2\text{Cl}_2$ ), HPLC analysis: 84% ee [Daicel CHIRALPAK OD-H column, 20 °C, 254 nm hexane/*i*-PrOH = 70:30, 0.7 mL /min, 19.7 min (major), 23.4 min (minor)].

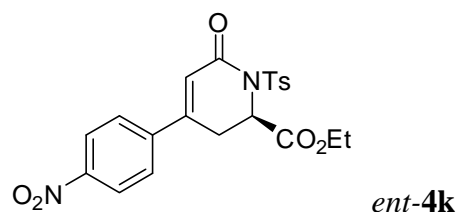

**(*R*)-ethyl-4-(4-nitrophenyl)-6-oxo-1-tosyl-1,2,3,6-tetrahydropyridine-2-carboxylate (*ent*-**4k**)**

Yield: 53.8 mg (61%), yellow waxy solid.  $R_f = 0.3$  (petroleum ether/ethyl acetate, 3:1);  $[\alpha]_D^{25} -55.9$  ( $c$  4.3,  $\text{CH}_2\text{Cl}_2$ ), HPLC analysis: ee was not determined because of the failure of its separation on CHIRALPAK OD, AD, OJ, OB, AS, IA columns.

#### 4. Chemical transformations of the dihydropyridinones (Scheme 4)

##### (1) Synthesis of tetrahydropyridinones (Scheme 4a)

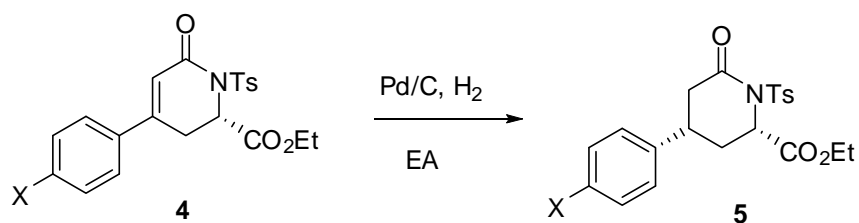

To the solution of **4d** (25.4 mg, 0.061 mmol) or **4e** (17.7 mg, 0.041 mmol) or **4k** (41.3 mg, 0.099 mmol) in EtOAc (3 mL) was added 10% Pd/C (5.0 mg) at room temperature, then the mixture was stirred at room temperature under 1 atm of hydrogen. The reaction mixture was diluted with ethyl acetate, and passed through a short silica pad. The solvent was removed under reduced pressure to give

teterhydropyridinones **5**.

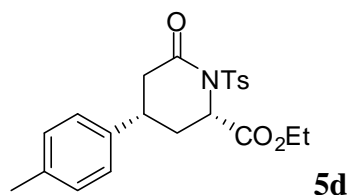

**(2*S*,4*S*)-ethyl 4-(4-methoxyphenyl)-6-oxo-1-tosylpiperidine-2-carboxylate (5d)**

Yield: 24.3 mg (98%), dr = 10:1, white waxy solid.  $R_f$  = 0.3 (petroleum ether/ethyl acetate, 3:1);  $[\alpha]_D^{25}$  -10.7 ( $c$  1.22,  $\text{CHCl}_3$ ), HPLC analysis: 93% ee [Daicel CHIRALPAK AD-H column, 20 ° C, 220 nm hexane/*i*-PrOH = 70:30, 1.0 mL /min, 15.4 min (major), 18.4 min (minor)].  $^1\text{H}$  NMR (300 MHz,  $\text{CDCl}_3$ )  $\delta$  8.00 (d,  $J$  = 7.9 Hz, 2H), 7.32 (d,  $J$  = 8.3 Hz, 2H), 7.13 (d,  $J$  = 8.0 Hz, 2H), 7.02 (d,  $J$  = 8.1 Hz, 2H), 5.04-4.99 (m, 1H), 4.32-4.15 (m, 2H), 3.09 (m, 3.14 - 3.03, 1H), 2.70-2.61 (m, 2H), 2.57-2.52 (m, 1H), 2.43 (s, 3H), 2.31 (s, 3H), 2.15-2.04 (m, 1H), 1.29 (t,  $J$  = 7.1 Hz, 3H).  $^{13}\text{C}$  NMR (75 MHz,  $\text{CDCl}_3$ )  $\delta$  171.5, 170.0, 145.1, 138.4, 137.3, 136.0, 129.8, 129.7, 129.2, 126.5, 62.2, 58.4, 41.3, 36.3, 34.5, 21.8, 21.1, 14.1. IR (KBr)  $\nu$  2923, 2854, 1744, 1698, 1353, 1190, 1168, 1086, 814, 662, 565, 543. HRMS (ESI)  $m/z$ :  $[\text{M}+\text{Na}]^+$  Calc. for:  $\text{C}_{22}\text{H}_{25}\text{NO}_5\text{NaS}$ , 438.13456, Found 438.13426.

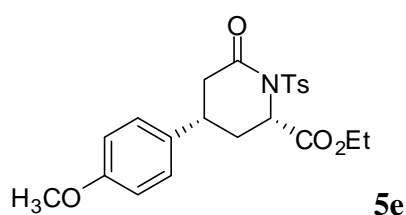

**(2*S*,4*S*)-ethyl 6-oxo-4-p-tolyl-1-tosylpiperidine-2-carboxylate (5e)**

Yield: 17.0 mg (97%), dr = 10:1, white waxy solid.  $R_f$  = 0.3 (petroleum ether/ethyl acetate, 3:1);  $[\alpha]_D^{25}$  -2.4 ( $c$  0.85,  $\text{CHCl}_3$ ), HPLC analysis: 94% ee [Daicel CHIRALPAK AD-H column, 20 ° C, 220 nm hexane/*i*-PrOH = 70:30, 1.0 mL /min, 70:30, 1.0 mL /min, 21.0 min (major), 27.1 min (minor)].  $^1\text{H}$  NMR (300 MHz,  $\text{CDCl}_3$ )  $\delta$  8.01 (d,  $J$  = 8.0 Hz, 2H), 7.32 (d,  $J$  = 8.2 Hz, 2H), 7.06 (d,  $J$  = 8.6 Hz, 2H), 6.85 (d,

$J = 8.6$  Hz, 2H), 5.04-4.99 (m, 1H), 4.32-4.18 (m, 2H), 3.78 (s, 3H), 3.13 - 3.03 (m, 1H), 2.70-2.60 (m, 2H), 2.56-2.50 (m, 1H), 2.43 (s, 3H), 2.13-2.02 (m, 1H), 1.29 (t,  $J = 7.1$  Hz, 3H).  $^{13}\text{C}$  NMR (75 MHz,  $\text{CDCl}_3$ )  $\delta$  171.5, 170.0, 159.0, 145.1, 136.1, 133.4, 129.8, 129.2, 127.6, 114.5, 62.3, 58.4, 55.4, 41.4, 35.9, 34.6, 21.8, 14.2. IR (KBr)  $\nu$  2961, 2924, 2853, 1747, 1704, 1515, 1456, 1260, 1088, 1019, 799, 661. HRMS (ESI)  $m/z$ :  $[\text{M}+\text{Na}]^+$  Calc. for:  $\text{C}_{22}\text{H}_{25}\text{NO}_6\text{NaS}$ , 454.12948, Found 454.12946.

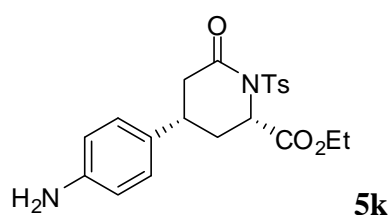

**(2*S*,4*S*)-ethyl 4-(4-aminophenyl)-6-oxo-1-tosylpiperidine-2-carboxylate (5k)**

Yield: 37.0 mg (90%), dr = 10:1, white waxy solid.  $R_f = 0.3$  (petroleum ether/ethyl acetate, 1:1);  $[\alpha]_D^{25} -21.0$  ( $c$  0.93,  $\text{CHCl}_3$ ), HPLC analysis: 99% ee [Daicel CHIRALPAK AD-H column, 20 ° C, 220 nm hexane/*i*-PrOH = 60:40, 1.0 mL /min, 70:30, 1.0 mL /min, 17.8 min (major), 37.8 min (minor)].  $^1\text{H}$  NMR (300 MHz,  $\text{CDCl}_3$ )  $\delta$  8.00 (d,  $J = 8.3$  Hz, 2H), 7.31 (d,  $J = 8.2$  Hz, 2H), 6.90 (d,  $J = 8.3$  Hz, 2H), 6.62 (d,  $J = 8.4$  Hz, 2H), 5.01-4.96 (m, 1H), 4.30-4.18 (m, 2H), 3.65 (bs, 2H), 3.05-2.95 (m, 1H), 2.65-2.59 (m, 2H), 2.53-2.47 (m, 1H), 2.43 (s, 3H) 2.09-1.98 (m, 1H), 1.28 (t,  $J = 7.1$  Hz, 3H).  $^{13}\text{C}$  NMR (75 MHz,  $\text{CDCl}_3$ )  $\delta$  171.5, 170.3, 145.8, 145.1, 136.1, 131.1, 129.7, 129.2, 127.5, 115.5, 62.2, 58.4, 41.4, 35.9, 34.7, 21.8, 14.1. IR (KBr)  $\nu$  3446, 2924, 1737, 1627, 1594, 1519, 1350, 1209, 1165, 1086, 1025, 659, 553. HRMS (ESI)  $m/z$ :  $[\text{M}+\text{H}]^+$  Calc. for:  $\text{C}_{21}\text{H}_{25}\text{N}_2\text{O}_5\text{S}$ , 417.14787, Found 417.14716.

## (2) Synthesis of piperidine (Scheme 4b)

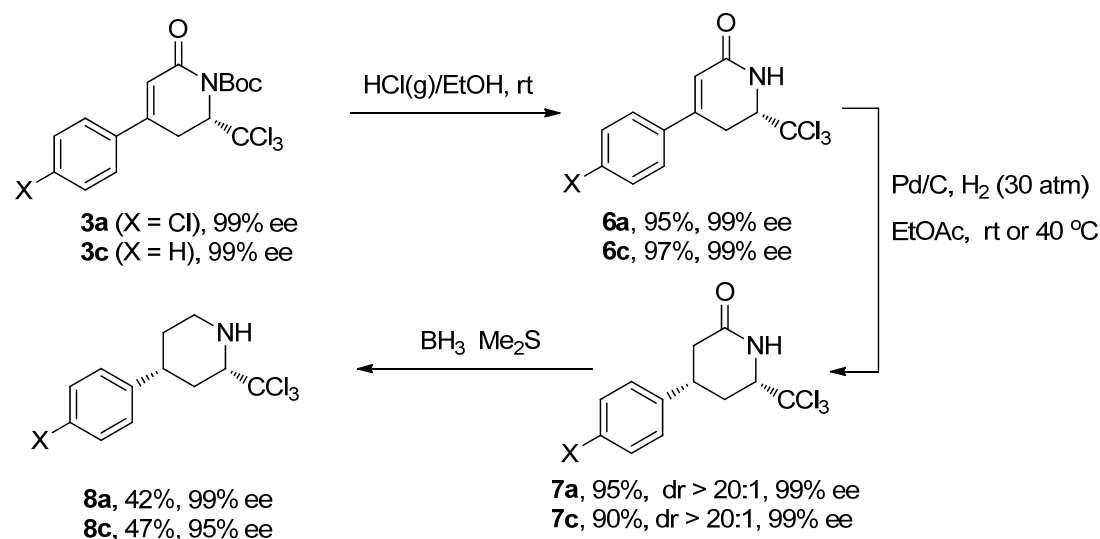

**Deprotection:** Dihydropridinone **3a** (438.6 mg, 1.04 mmol) or **3c** (419.0 mg, 1.08 mmol) was dissolved in 6 N HCl(g)/EtOH (6 mL) and the mixture was stirred at room temperature. The solvent was removed under reduced pressure and the residue was purified by chromatography on silica gel (PE/EA, 2:1) to give deprotective dihydropridinone **6a** or **6c**.

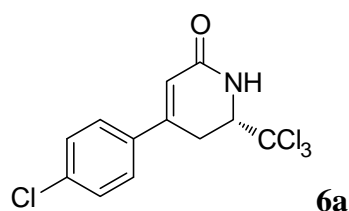

### (*S*)-4-(4-chlorophenyl)-6-(trichloromethyl)-5,6-dihydropyridin-2(1H)-one (**6a**)

Yield: 318.2 mg (95%), white solid, mp: 155-157 °C.  $R_f$  = 0.2 (petroleum ether/ethyl acetate, 1:1);  $[\alpha]_D^{25}$  32.7 ( $c$  0.52, CH<sub>2</sub>Cl<sub>2</sub>), HPLC analysis: 98% ee [Daicel CHIRALPAK AD-H column, 20 °C, 254 nm hexane/*i*-PrOH = 70:30, 1.0 mL /min, 14.2 min (minor), 18.6 min (major)]. <sup>1</sup>H NMR (300 MHz, CDCl<sub>3</sub>) δ 7.41-7.20 (m, 4H), 6.66 (s, 1H), 6.21 (d,  $J$  = 1.4 Hz, 1H), 4.39-4.34 (m, 1H), 3.17 (d,  $J$  = 7.0 Hz, 2H). <sup>13</sup>C NMR (75 MHz, CDCl<sub>3</sub>) δ 165.7, 147.4, 136.4, 135.4, 129.4, 127.4, 118.7, 102.1, 65.7,

28.0. IR (KBr)  $\nu$  3207, 2961, 1674, 1490, 1410, 1260, 1093, 1012, 808, 733. HRMS (ESI)  $m/z$ :  $[M+H]^+$  Calc. for:  $C_{12}H_{10}NOCl_4$ , 323.95110, Found 323.95105.

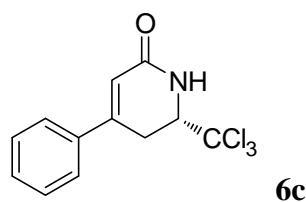

**(S)-4-phenyl-6-(trichloromethyl)-5,6-dihydropyridin-2(1H)-one (6c)**

Yield: 302.0 mg (97%), white solid, mp: 164-166 ° C.  $R_f$  = 0.3 (petroleum ether/ethyl acetate, 3:1);  $[\alpha]_D^{25}$  33.0 ( $c$  1.0,  $CH_2Cl_2$ ), HPLC analysis: >99% ee [Daicel CHIRALPAK AD-H column, 20 ° C, 254 nm hexane/*i*-PrOH = 90:10, 1.0 mL /min, - (minor), 24.9 min (major)].  $^1H$  NMR (300 MHz,  $CDCl_3$ )  $\delta$  7.47-7.45 (m, 2H), 7.39-7.36 (m, 3H), 6.24 (d,  $J$  = 1.3 Hz, 1H), 6.12 (s, 1H), 4.37 (dd,  $J$  = 7.0, 5.1 Hz, 1H), 3.26-3.17 (dd,  $J$  = 8.4, 1.2 Hz, 2H).  $^{13}C$  NMR (75 MHz,  $CDCl_3$ )  $\delta$  166.1, 148.8, 137.0, 130.3, 129.1, 126.1, 118.2, 102.2, 65.7, 28.0. IR (KBr)  $\nu$  3481, 3227, 1675, 1620, 1446, 1293, 868, 810, 761, 692. HRMS (ESI)  $m/z$ :  $[M+Na]^+$  Calc. for:  $C_{12}H_{10}NO_3NaCl_3$ , 311.97202, Found 311.97198.

**Hydrogenation:** To the solution of **6a** (98.5 mg, 0.301 mmol) or **6c** (75.3 mg, 0.257 mmol) in EtOAc (3 mL) was added 10% Pd/C (10.0 mg) at 40 ° C (for **S1a**) or room temperature (for **6c**), then the mixture was stirred at 40 ° C or room temperature under 30 atm of hydrogen. The reaction mixture was diluted with ethyl acetate, and passed through a short silica pad. The solvent was removed under reduced pressure to give tetrahydropyridinone **7a** or **7c**.

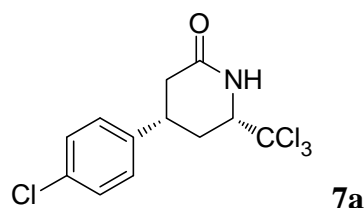

**(4S,6S)-4-(4-chlorophenyl)-6-(trichloromethyl)piperidin-2-one (7a)**

Yield: 88.1 mg (90%), white waxy solid.  $R_f = 0.3$  (petroleum ether/ethyl acetate, 1:1);  $[\alpha]_D^{25} -21.0$  ( $c$  1.0,  $\text{CH}_2\text{Cl}_2$ ), HPLC analysis: >99% ee [Daicel CHIRALPAK AD-H column, 20 ° C, 220 nm hexane/*i*-PrOH = 90:10, 1.0 mL /min, - min (minor), 19.4 min (major)].  $^1\text{H}$  NMR (300 MHz,  $\text{CDCl}_3$ )  $\delta$  7.28-7.26 (m, 2H), 7.12-7.09 (m, 2H), 6.50 (s, 1H), 4.22 (dd,  $J = 10.2, 5.6$  Hz, 1H), 3.10-2.99 (m, 1H), 2.65-2.50 (m, 2H), 2.44-2.34 (m, 1H), 1.94-1.82 (m, 1H).  $^{13}\text{C}$  NMR (75 MHz,  $\text{CDCl}_3$ )  $\delta$  171.7, 140.5, 133.4, 129.3, 128.0, 101.9, 67.3, 38.8, 36.7, 32.4. IR (KBr)  $\nu$  3217, 2925, 1674, 1493, 1396, 1313, 1092, 1013, 825, 799, 779. HRMS (ESI)  $m/z$ :  $[\text{M}+\text{H}]^+$  Calc. for:  $\text{C}_{12}\text{H}_{12}\text{NOCl}_4$ , 325.96675, Found 325.96618.

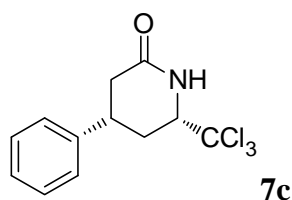

**(4S,6S)-4-phenyl-6-(trichloromethyl)piperidin-2-one (7c)**

Yield: 67.7 mg (90%), white solid, mp: 104-106 ° C.  $R_f = 0.3$  (petroleum ether/ethyl acetate, 3:1);  $[\alpha]_D^{25} -21.0$  ( $c$  1.0,  $\text{CH}_2\text{Cl}_2$ ), HPLC analysis: >99% ee [Daicel CHIRALPAK AD-H column, 20 ° C, 254 nm hexane/*i*-PrOH = 90:10, 1.0 mL /min, - min (minor), 13.5 min (major)].  $^1\text{H}$  NMR (300 MHz,  $\text{CDCl}_3$ )  $\delta$  7.33-7.28 (m, 2H), 7.25-7.16 (m, 3H), 6.43 (s, 1H), 4.22 (dd,  $J = 10.5, 5.4$  Hz, 1H), 3.12-3.00 (m, 1H), 2.69-2.57 (m, 2H), 2.56-2.39 (m, 1H), 2.00-1.86 (m, 1H).  $^{13}\text{C}$  NMR (75 MHz,  $\text{CDCl}_3$ )  $\delta$  172.1, 142.0, 129.2, 127.6, 126.6, 102.0, 67.5, 38.8, 37.3, 32.6. IR (KBr)  $\nu$  3217, 3029, 1671, 1455, 1394, 1307, 1029, 882, 780, 699, 611. HRMS (ESI)  $m/z$ :  $[\text{M}+\text{H}]^+$  Calc. for:  $\text{C}_{12}\text{H}_{13}\text{NO}_3\text{Cl}_3$ , 292.00572, Found 292.00570.

**Reduction:** To a solution of **7a** (21.9 mg, 0.067 mmol) or **7c** (40.0 mg, 0.137 mmol) in THF ( 1.0 mL) under nitrogen 10 N  $\text{BH}_3/\text{Me}_2\text{S}$  (20  $\mu\text{L}$  or 41  $\mu\text{L}$ , 3.0 eq) was added, then the mixture was heated to reflux for 17 h. The solvent was removed under reduced pressure and the residue was purified by chromatography on silica gel (PE/EA, 10:1) to give piperidine **8a** or **8c**.



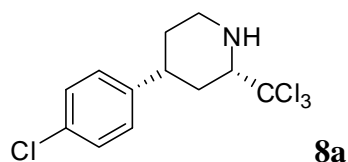

**(2*S*,4*R*)-4-(4-chlorophenyl)-2-(trichloromethyl)piperidine (8a)**

Yield: 8.8 mg (42%), white waxy solid.  $R_f = 0.3$  (petroleum ether/ethyl acetate, 10:1);  $[\alpha]_D^{25} -5.8$  ( $c$  1.2,  $\text{CH}_2\text{Cl}_2$ ), HPLC analysis: >99% ee [Daicel CHIRALPAK AD-H column, 20 ° C, 220 nm hexane/*i*-PrOH = 98:2, 1.0 mL /min, - min (minor), 20.5 min (major)].  $^1\text{H}$  NMR (300 MHz,  $\text{CDCl}_3$ )  $\delta$  7.29 (d,  $J = 8.7$  Hz, 2H), 7.18 (d,  $J = 8.4$  Hz, 2H), 3.44-3.35 (m, 2H), 2.91 (td,  $J = 12.1, 2.8$  Hz, 1H), 2.69 (tt,  $J = 12.3, 3.5$  Hz, 1H), 2.44-2.37 (m, 1H), 2.34 (br, 1H), 1.84 (d,  $J = 11.8$  Hz, 1H), 1.73-1.61 (m, 2H).  $^{13}\text{C}$  NMR (75 MHz,  $\text{CDCl}_3$ )  $\delta$  143.8, 132.5, 128.9, 128.3, 103.2, 72.0, 46.7, 41.8, 35.6, 33.0. IR (KBr)  $\nu$  2923, 1493, 1432, 1308, 1091, 1013, 796, 763, 697. HRMS (ESI)  $m/z$ :  $[\text{M}+\text{H}]^+$  Calc. for:  $\text{C}_{12}\text{H}_{14}\text{NCl}_4$ , 311.98749, Found 311.98726.

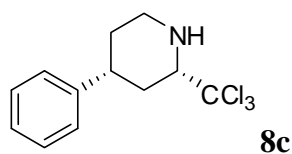

**(2*S*,4*R*)-4-phenyl-2-(trichloromethyl)piperidine (8c)**

Yield: 18.8 mg (47%), white waxy solid.  $R_f = 0.3$  (petroleum ether/ethyl acetate, 10:1);  $[\alpha]_D^{25} -5.3$  ( $c$  1.5,  $\text{CH}_2\text{Cl}_2$ ), HPLC analysis: 95% ee [Daicel CHIRALPAK AD-H column, 20 ° C, 220 nm hexane/*i*-PrOH = 98:2, 1.0 mL /min, 10.7 min (major), 14.3 min (minor)].  $^1\text{H}$  NMR (300 MHz,  $\text{CDCl}_3$ )  $\delta$  7.29-7.24 (m, 2H), 7.20 - 7.17 (m, 3H), 3.38-3.30 (m, 2H), 2.86 (td,  $J = 12.0, 2.9$  Hz, 1H), 2.65 (tt,  $J = 12.3, 3.6$  Hz, 1H), 2.40-2.36 (m, 1H), 1.81 (d,  $J = 12.5$  Hz, 1H), 1.73-1.58 (m, 3H).  $^{13}\text{C}$  NMR (75 MHz,  $\text{CDCl}_3$ )  $\delta$  145.3, 128.8, 127.0, 126.8, 72.1, 46.9, 42.3, 35.6, 33.0. IR (KBr)  $\nu$  2929, 1494, 1453, 1147, 766, 754, 698, 656. HRMS (ESI)  $m/z$ :  $[\text{M}+\text{H}]^+$  Calc. for:  $\text{C}_{12}\text{H}_{15}\text{NCl}_3$ , 278.02646, Found 278.02713.

### (3) Synthesis of pipercolic acid (Scheme 4c)

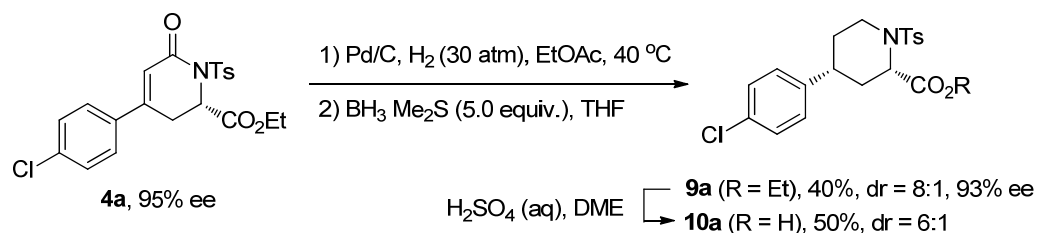

**Hydrogenation and reduction:** To the solution of **4a** (211 mg, 0.487 mmol) in EtOAc (3 mL) was added 10% Pd/C (20 mg) at room temperature, then the mixture was stirred at 40 °C under 30 atm of hydrogen. The reaction mixture was diluted with ethyl acetate, and passed through a short silica pad. The solvent was removed under reduced pressure to give the corresponding tetrahydropyridinone. To the solution of the tetrahydropyridinone (56 mg, 0.128 mmol) in THF (2.0 mL) under nitrogen 10 N BH<sub>3</sub>/Me<sub>2</sub>S (65 μL, 5.0 eq) was added, then the mixture was stirred at room temperature for 17 h. The solvent was removed under reduced pressure and the residue was purified by chromatography on silica gel (PE/EA, 3:1) to give **9a**.

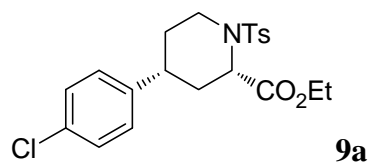

#### (2S,4R)-ethyl 4-(4-chlorophenyl)-1-tosylpiperidine-2-carboxylate (**9a**)

Total Yield: 22.0 mg (40%), dr =8:1, white waxy solid.  $R_f$  = 0.3 (petroleum ether/ethyl acetate, 1:1);  $[\alpha]_D^{25}$  -21.0 ( $c$  1.0, CH<sub>2</sub>Cl<sub>2</sub>), HPLC analysis: 93% ee [Daicel CHIRALPAK AS-H column, 20 °C, 220 nm hexane/*i*-PrOH = 85:15, 1.0 mL /min, 22.2 min (minor), 27.2min (major)]. <sup>1</sup>H NMR (300 MHz, CDCl<sub>3</sub>) δ 7.72-7.69 (m, 2H), 7.29-7.27 (m, 2H), 7.24-7.12 (m, 2H), 7.08-7.06 (m, 1H), 7.02-6.99 (d,  $J$  = 8.4 Hz, 1H), 4.14-4.00 (m, 2H), 3.74-3.63 (m, 2H), 2.72-2.62 (m, 1H), 2.48-2.43 (m, 1H), 2.38 (s, 3H), 2.09-2.03 (m, 2H), 1.87-1.83 (m, 2H), 1.19 (t,  $J$  = 7.1 Hz, 3H). <sup>13</sup>C NMR (75 MHz, CDCl<sub>3</sub>) δ 171.3 (171.2), 144.10 (144.05), 143.6 (142.1), 133.5 (133.4), 132.6 (129.7), 128.9 (128.8), 128.52 (128.48), 128.3 (126.9), 61.7 (61.6), 59.4 (59.1),

45.9 (45.6), 39.2 (38.5), 36.4 (36.1), 30.70 (30.65), 21.7, 14.1. (The data in parentheses was for the minor *trans*-isomer). IR (KBr) 2926, 1737, 1494, 1347, 1166, 1092, 1057, 954, 817, 756, 651, 588, 551. HRMS (ESI)  $m/z$ :  $[M+Na]^+$  Calc. for:  $C_{21}H_{24}NO_4NaClS$ , 444.10068, Found 444.10101.

**Hydrolysis:** To the solution of **9a** (22.0 mg, 0.052 mmol) in DME (1 mL) was charged with 8N  $H_2SO_4$  (1.0 mL) and then the mixture was heated to reflux. The mixture was extracted with ethyl acetate, and dried with anhydrous  $Na_2SO_4$ . The solvent was removed under reduced pressure and the residue was purified by chromatography on silica gel (dichloromethane/methanol, 20:1) to give **10a** (ee% was not determined).

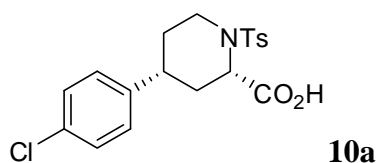

**(2S,4R)-4-(4-chlorophenyl)-1-tosylpiperidine-2-carboxylic acid (10a)**

Yield: 10.0 mg (60%), dr = 6:1, pale wax,  $R_f$  = 0.3 (dichloromethane/methanol, 10:1);  $[\alpha]_D^{25}$  -56.3 ( $c$  0.27,  $CHCl_3$ ).  $^1H$  NMR (300 MHz,  $CDCl_3$ )  $\delta$  7.74-7.61 (m, 2H), 7.30-7.27 (m, 2H), 7.22-7.11 (m, 2H), 7.05 (d,  $J$  = 7.2 Hz, 1H), 6.99 (d,  $J$  = 8.3 Hz, 1H), 4.44 (bs, 1H), 3.72-3.65 (m, 2H), 2.74-2.67 (m, 1H), 2.45-2.34 (m, 4H), 2.16-2.09 (m, 1H), 2.06-1.95 (m, 1H), 1.86-1.75 (m, 2H).  $^{13}C$  NMR (75 MHz,  $CDCl_3$ )  $\delta$  175.7, 144.3 (143.6), 142.1, 133.34 (133.27), 132.7 (129.9), 128.9 (128.8), 128.6 (128.5), 128.3, 127.0 (126.9), 59.0 (58.8), 45.7 (45.4), 39.2 (38.5), 36.0 (35.8), 30.9 (30.8), 21.7. (The data in parentheses was for the minor *trans*-isomer). IR (KBr)  $\nu$  3386, 2923, 2853, 1719, 1494, 1340, 1165, 1092, 817, 752, 654, 580, 456. HRMS (ESI)  $m/z$ :  $[M-H]^-$  Calc. for:  $C_{19}H_{19}NO_4ClS$ , 392.07178, Found 392.07182.

#### (4) Synthesis of piperidine methanol (Scheme 4d)

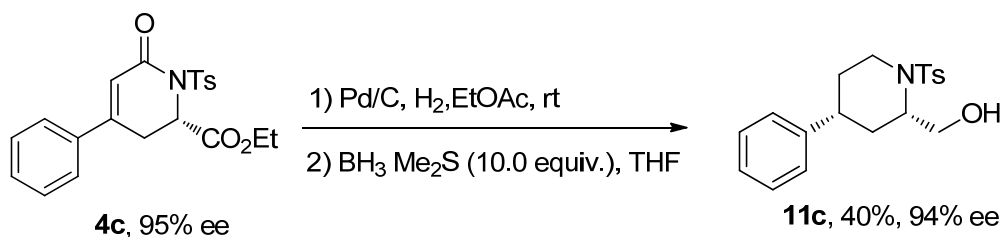

The procedure was carried as in Scheme 1c, except that room temperature was applied for hydrogenation, and 10 equiv. of BH<sub>3</sub> was used for reduction.

#### ((2*S*,4*R*)-4-phenyl-1-tosylpiperidin-2-yl)methanol (**11c**)

Overall yield for two steps: 17.3 mg (40%). white waxy solid.  $R_f = 0.3$  (petroleum ether/ethyl acetate, 3:1);  $[\alpha]_D^{25} -34.7$  ( $c$  0.75, CHCl<sub>3</sub>), HPLC analysis: 94% ee [Daicel CHIRALPAK AD-H column, 20 ° C, 220 nm hexane/*i*-PrOH = 60:40, 1.0 mL /min, 8.9 min (major), 10.9 min (minor)]. <sup>1</sup>H NMR (300 MHz, CDCl<sub>3</sub>)  $\delta$  7.70 (d,  $J = 8.2$  Hz, 2H), 7.30 (d,  $J = 8.1$  Hz, 2H), 7.22-7.18 (m, 2H), 7.14-7.09 (m, 1H), 7.01-6.99 (m, 2H), 4.04-4.00 (m, 1H), 3.91 (dt,  $J = 8.4, 4.9$  Hz, 1H), 3.02-2.85 (m, 1H), 3.59-3.51 (m, 1H) 3.09-2.83 (m, 3H), 2.40 (s, 3H), 2.36-2.29 (m, 1H), 1.97-1.81 (m, 2H), 1.72-1.59 (m, 2H). <sup>13</sup>C NMR (75 MHz, CDCl<sub>3</sub>)  $\delta$  144.7, 144.0, 130.0, 128.7, 127.6, 126.8, 126.7, 64.9, 60.9, 47.3, 40.8, 35.4, 31.9, 21.7. IR (KBr)  $\nu$  3502, 2954, 2923, 2853, 1456, 1324, 1288, 1158, 1090, 799, 716, 700, 573.  $[M+Na]^+$  Calc. for: C<sub>19</sub>H<sub>23</sub>NO<sub>3</sub>NaS, 368.12909, Found 368.12897.

## 5. X-ray structures of 7c (Figure S1)

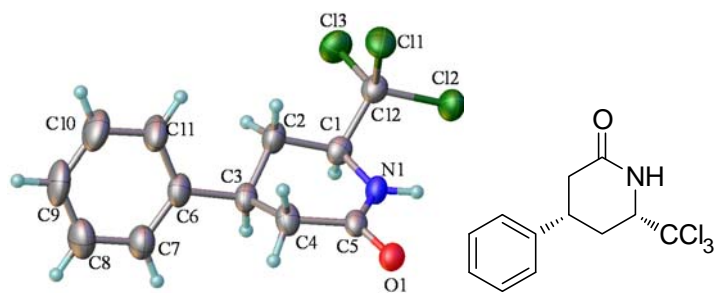

Figure S1. X-ray crystal structure of **7c**

## Reference

- (1) Tiseni, P. S.; Peters, R. *Angew. Chem. Int. Ed.* **2007**, *46*, 5325.
- (2) (a) Oliver, L. H.; Puls, L. A.; Tobey, S. L. *Tetrahedron Letters*, **2008**, *49*, 4636;  
(b) Vidal, J.; Hannachi, J.-C.; Hourdin, G.; Mulatier, J.-C.; Collet, A. *Tetrahedron Letters*, **1998**, *39*, 8845.

# Part II NMR Spectra

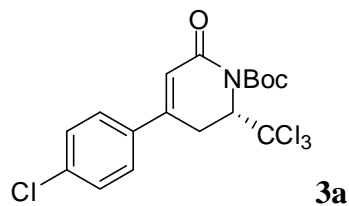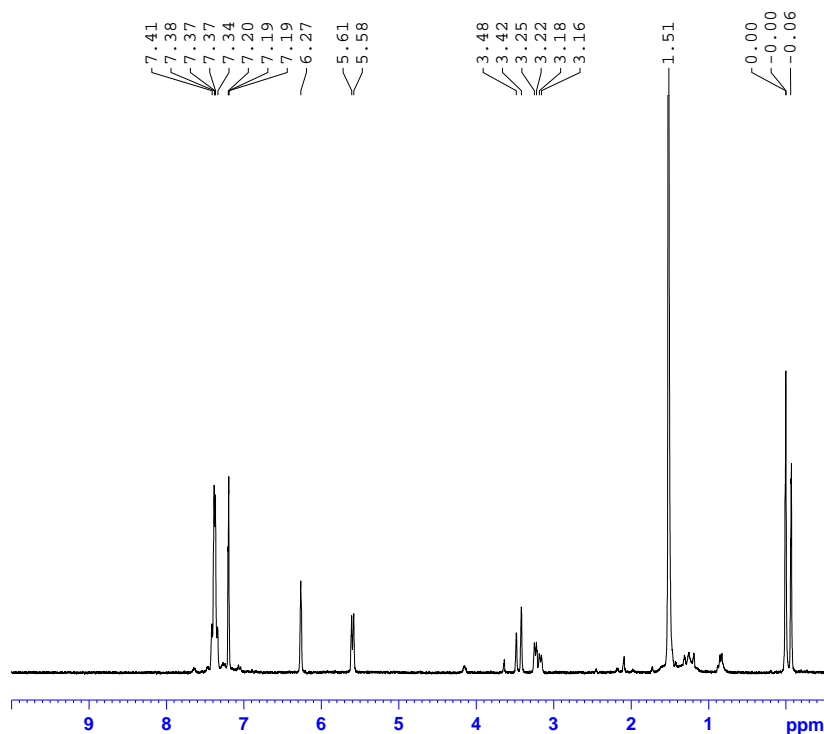

```

NAME      jwq-464-080g1
EXPNO    10
PROCNO    1
Date_     20130407
Time      17.39
INSTRUM   spect
PROBHD    5 mm DUL 13C-1
PULPROG   zg30
TD         32768
SOLVENT   CDCl3
NS         6
DS         0
SWH        6172.839 Hz
FIDRES     0.188380 Hz
AQ         2.6542580 sec
RG         362
DW         81.000 usec
DE         6.50 usec
TE         295.6 K
D1         1.0000000 sec
TD0        1
    
```

```

===== CHANNEL f1 =====
NUC1      1H
P1        10.30 usec
PL1       3.00 dB
SF01      300.1318534 MHz
SI        32768
SF        300.1300273 MHz
WDW       EM
SSB       0
LB        0.30 Hz
GB         0
PC         1.00
    
```

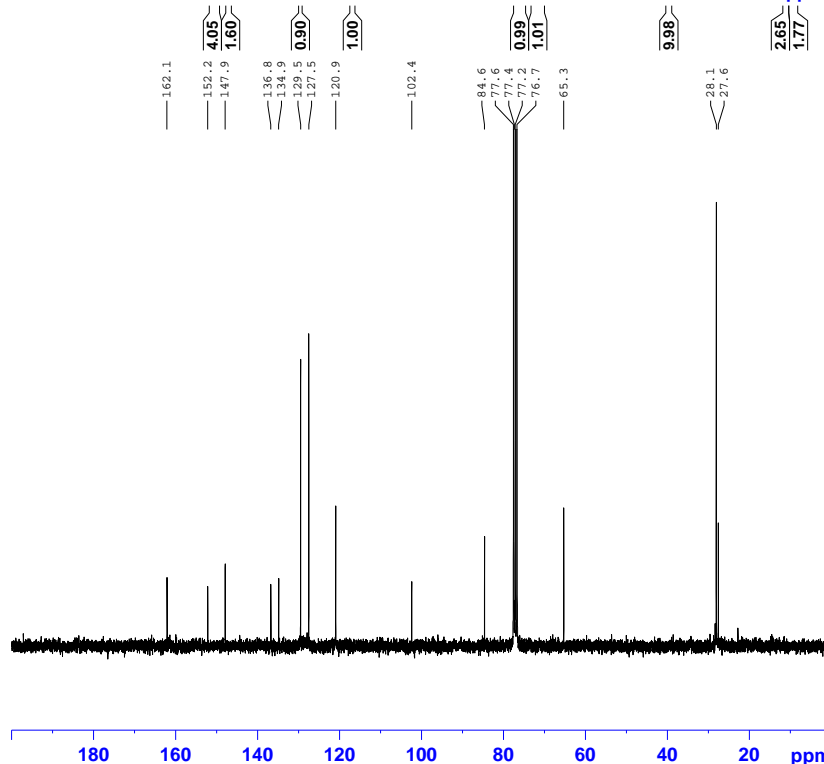

```

NAME      jwq-434d-047g2
EXPNO    20
PROCNO    1
Date_     20130126
Time      20.55
INSTRUM   spect
PROBHD    5 mm DUL 13C-1
PULPROG   zgpg30
TD         65536
SOLVENT   CDCl3
NS         968
DS         4
SWH        17985.611 Hz
FIDRES     0.274439 Hz
AQ         1.8219508 sec
RG         512
DW         27.800 usec
DE         6.50 usec
TE         295.4 K
D1         2.0000000 sec
D11        0.0300000 sec
TD0        1
    
```

```

===== CHANNEL f1 =====
NUC1      13C
P1        12.50 usec
PL1       2.00 dB
SF01      75.4752953 MHz
    
```

```

===== CHANNEL f2 =====
CPDPRG2   waltz16
NUC2      1H
PCPD2     100.00 usec
PL2       3.00 dB
PL12      22.74 dB
PL13      23.00 dB
SF02      300.1312005 MHz
SI        32768
SF        75.4677389 MHz
WDW       EM
SSB       0
LB        1.00 Hz
GB         0
PC         1.40
    
```

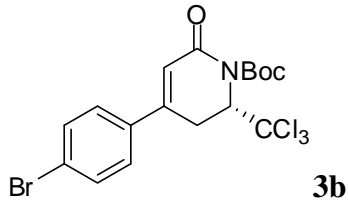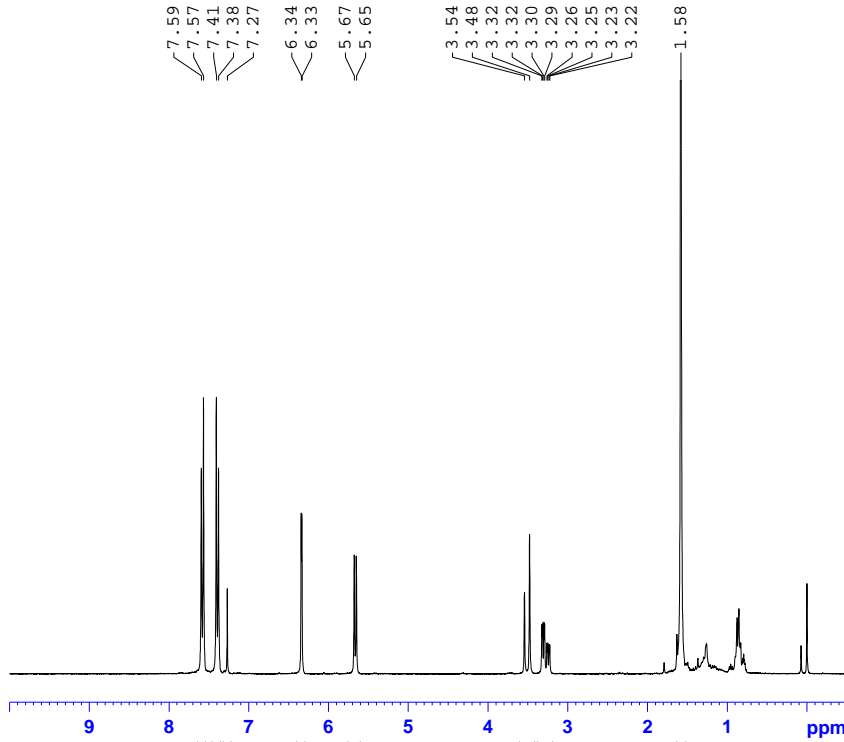

```

NAME      jwq-449c-064g1
EXPNO     10
PROCNO    1
Date_     20130304
Time      18.45
INSTRUM   spect
PROBHD    5 mm DUL 13C-1
PULPROG   zg30
TD         65536
SOLVENT   CDCl3
NS         3
DS         0
SWH        8992.806 Hz
FIDRES     0.137219 Hz
AQ         3.6438515 sec
RG         181
DW         55.600 usec
DE         8.00 usec
TE         297.0 K
D1         1.00000000 sec
TD0        1
  
```

```

===== CHANNEL f1 =====
NUC1      1H
P1         10.30 usec
PL1        3.00 dB
SFO1      300.1324010 MHz
SI         32768
SF         300.1300039 MHz
WDW        EM
SSB        0
LB         0.30 Hz
GB         0
PC         1.00
  
```

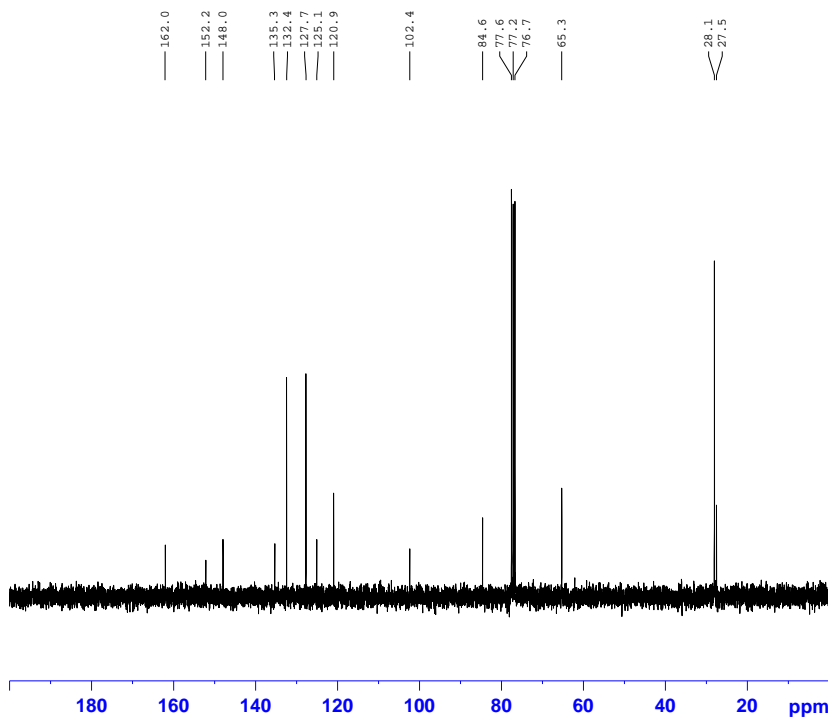

```

NAME      jwq-449c-064g1
EXPNO     11
PROCNO    1
Date_     20130304
Time      18.47
INSTRUM   spect
PROBHD    5 mm DUL 13C-1
PULPROG   zgpg30
TD         65536
SOLVENT   CDCl3
NS         41
DS         4
SWH        17985.611 Hz
FIDRES     0.274439 Hz
AQ         1.8219508 sec
RG         1149.4
DW         27.800 usec
DE         6.50 usec
TE         297.2 K
D1         2.00000000 sec
D11        0.03000000 sec
TD0        1
  
```

```

===== CHANNEL f1 =====
NUC1      13C
P1         12.50 usec
PL1        2.00 dB
SFO1      75.4752953 MHz
  
```

```

===== CHANNEL f2 =====
CPDPRG2   waltz16
NUC2      1H
PCPD2     100.00 usec
PL2        3.00 dB
PL12       22.74 dB
PL13       23.00 dB
SFO2      300.1312005 MHz
SI         32768
SF         75.4677394 MHz
WDW        EM
SSB        0
LB         1.00 Hz
GB         0
PC         1.40
  
```

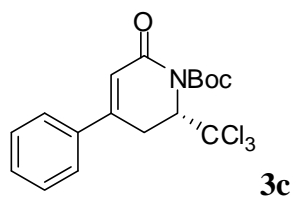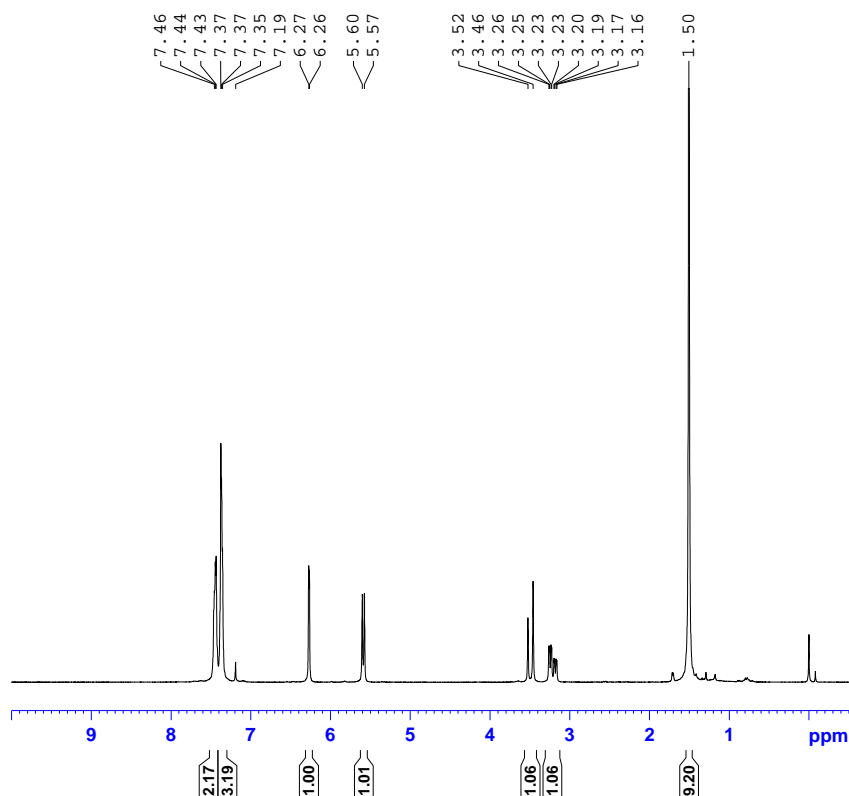

```

NAME      jwq-457a-072g1
EXPNO     11
PROCNO    1
Date_     20130328
Time      0.27
INSTRUM   spect
PROBHD    5 mm DUL 13C-1
PULPROG   zg30
TD         32768
SOLVENT   CDCl3
NS         3
DS         0
SWH        6172.839 Hz
FIDRES     0.188380 Hz
AQ         2.6542580 sec
RG         64
DW         81.000 usec
DE         6.50 usec
TE         295.4 K
D1         1.00000000 sec
TD0        1
  
```

```

===== CHANNEL f1 =====
NUC1      1H
P1         10.30 usec
PL1        3.00 dB
SFO1      300.1318534 MHz
SI         32768
SF         300.1300282 MHz
WDW        EM
SSB        0
LB         0.30 Hz
GB         0
PC         1.00
  
```

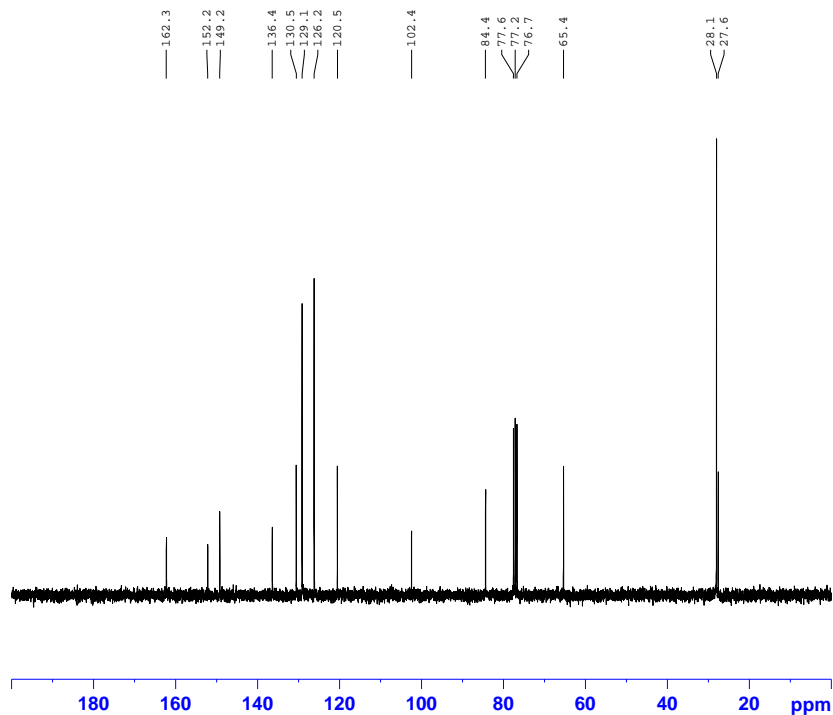

```

NAME      jwq-457a-072g1
EXPNO     10
PROCNO    1
Date_     20130328
Time      0.32
INSTRUM   spect
PROBHD    5 mm DUL 13C-1
PULPROG   zgpg30
TD         65536
SOLVENT   CDCl3
NS         47
DS         4
SWH        17985.611 Hz
FIDRES     0.274439 Hz
AQ         1.8219508 sec
RG         456.1
DW         27.800 usec
DE         6.50 usec
TE         295.8 K
D1         2.00000000 sec
D11        0.03000000 sec
TD0        1
  
```

```

===== CHANNEL f1 =====
NUC1      13C
P1         12.50 usec
PL1        2.00 dB
SFO1      75.4752953 MHz
  
```

```

===== CHANNEL f2 =====
CPDPRG2   waltz16
NUC2      1H
PCPD2     100.00 usec
PL2        3.00 dB
PL12      22.74 dB
PL13      23.00 dB
SFO2      300.1312005 MHz
SI         32768
SF         75.4677441 MHz
WDW        EM
SSB        0
LB         1.00 Hz
GB         0
PC         1.40
  
```



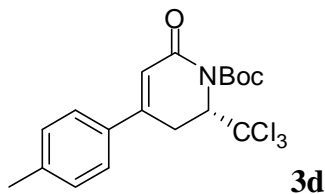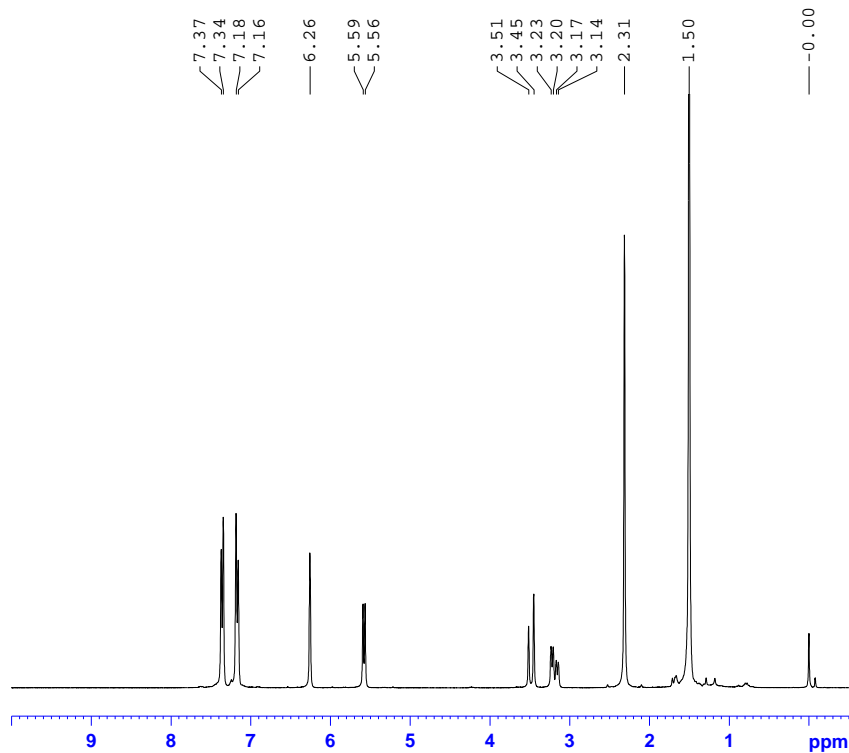

```

NAME      jwq-451a-065g1
EXPNO     10
PROCNO    1
Date_     20130308
Time      13.55
INSTRUM   spect
PROBHD    5 mm DUL 13C-1
PULPROG   zg30
TD         65536
SOLVENT   CDCl3
NS         4
DS         0
SWH        8992.806 Hz
FIDRES     0.137219 Hz
AQ         3.6438515 sec
RG         64
DW         55.600 usec
DE         8.00 usec
TE         296.8 K
D1         1.00000000 sec
TD0        1

===== CHANNEL f1 =====
NUC1      1H
P1        10.30 usec
PL1       3.00 dB
SFO1      300.1324010 MHz
SI        32768
SF        300.1300271 MHz
WDW       EM
SSB       0
LB        0.30 Hz
GB        0
PC        1.00

```

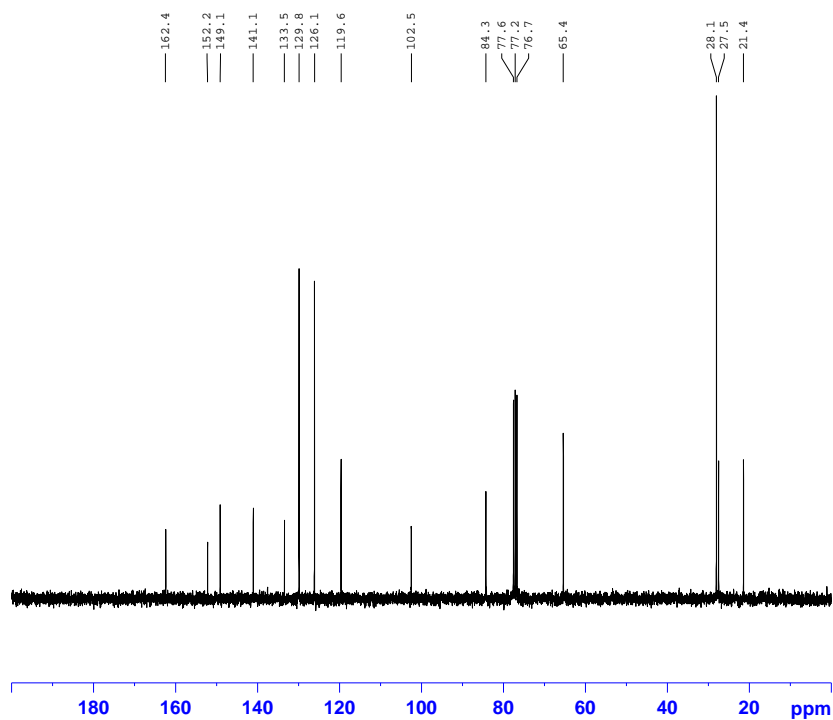

```

NAME      jwq-451a-065g1
EXPNO     11
PROCNO    1
Date_     20130308
Time      13.58
INSTRUM   spect
PROBHD    5 mm DUL 13C-1
PULPROG   zgpg30
TD         65536
SOLVENT   CDCl3
NS         61
DS         4
SWH        17985.611 Hz
FIDRES     0.274439 Hz
AQ         1.8219508 sec
RG         812.7
DW         27.800 usec
DE         6.50 usec
TE         297.2 K
D1         2.00000000 sec
D11        0.03000000 sec
TD0        1

===== CHANNEL f1 =====
NUC1      13C
P1        12.50 usec
PL1       2.00 dB
SFO1      75.4752953 MHz

===== CHANNEL f2 =====
CPDPRG2   waltz16
NUC2      1H
PCPD2     100.00 usec
PL2       3.00 dB
PL12      22.74 dB
PL13      23.00 dB
SFO2      300.1312005 MHz
SI        32768
SF        75.4677425 MHz
WDW       EM
SSB       0
LB        1.00 Hz
GB        0
PC        1.40

```

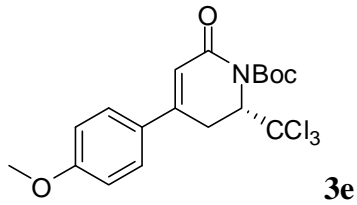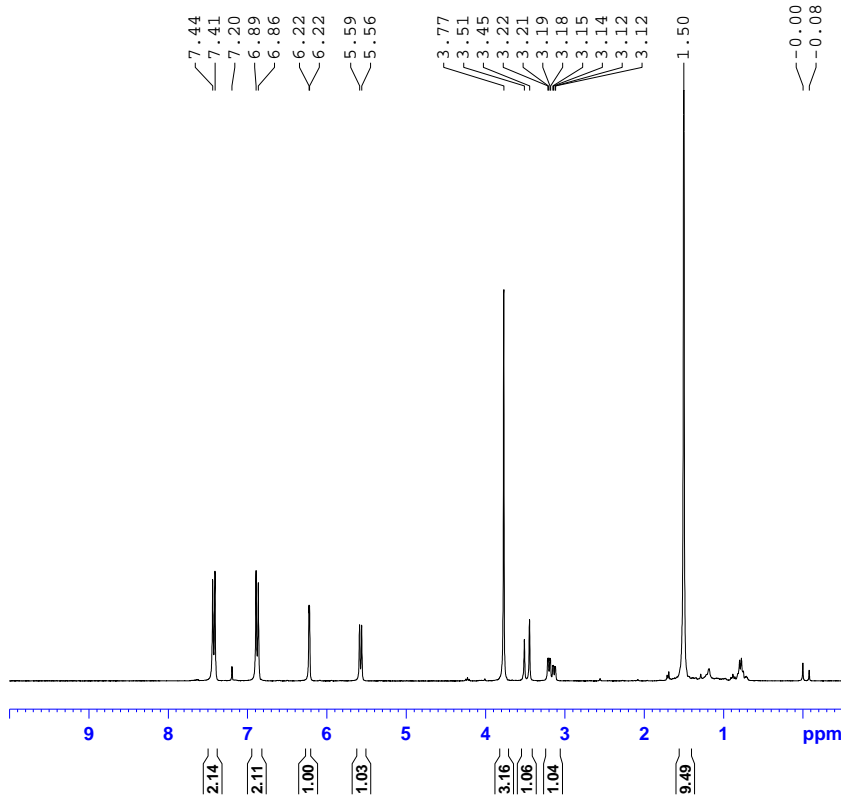

```

NAME      jwq-455a-069g1
EXPNO    10
PROCNO   1
Date_    20130311
Time     13.02
INSTRUM  spect
PROBHD   5 mm DUL 13C-1
PULPROG  zg30
TD       65536
SOLVENT  CDCl3
NS       3
DS       0
SWH      8992.806 Hz
FIDRES   0.137219 Hz
AQ       3.6438515 sec
RG       71.8
DW       55.600 usec
DE       8.00 usec
TE       297.3 K
D1       1.00000000 sec
TD0      1

===== CHANNEL f1 =====
NUC1     1H
P1       10.30 usec
PL1     3.00 dB
SF01    300.1324010 MHz
SI      32768
SF      300.1300251 MHz
WDW     EM
SSB     0
LB      0.30 Hz
GB      0
PC      1.00
  
```

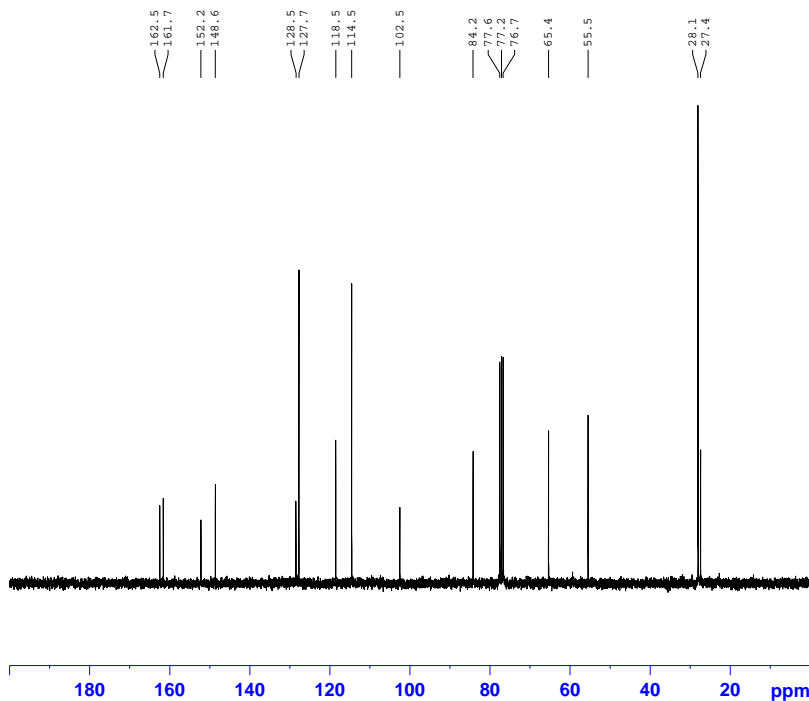

```

NAME      jwq-455a-069g1
EXPNO    11
PROCNO   1
Date_    20130311
Time     13.08
INSTRUM  spect
PROBHD   5 mm DUL 13C-1
PULPROG  zgpg30
TD       65536
SOLVENT  CDCl3
NS       90
DS       4
SWH      17985.611 Hz
FIDRES   0.274439 Hz
AQ       1.8219508 sec
RG       574.7
DW       27.800 usec
DE       6.50 usec
TE       297.8 K
D1       2.00000000 sec
D11     0.03000000 sec
TD0      1

===== CHANNEL f1 =====
NUC1     13C
P1       12.50 usec
PL1     2.00 dB
SF01    75.4752953 MHz

===== CHANNEL f2 =====
CPDPRG2  waltz16
NUC2     1H
PCPD2    100.00 usec
PL2     3.00 dB
PL12    22.74 dB
PL13    23.00 dB
SF02    300.1312005 MHz
SI      32768
SF      75.4677427 MHz
WDW     EM
SSB     0
LB      1.00 Hz
GB      0
PC      1.40
  
```

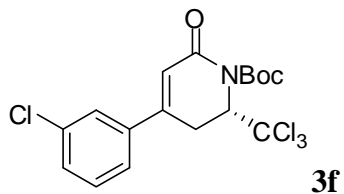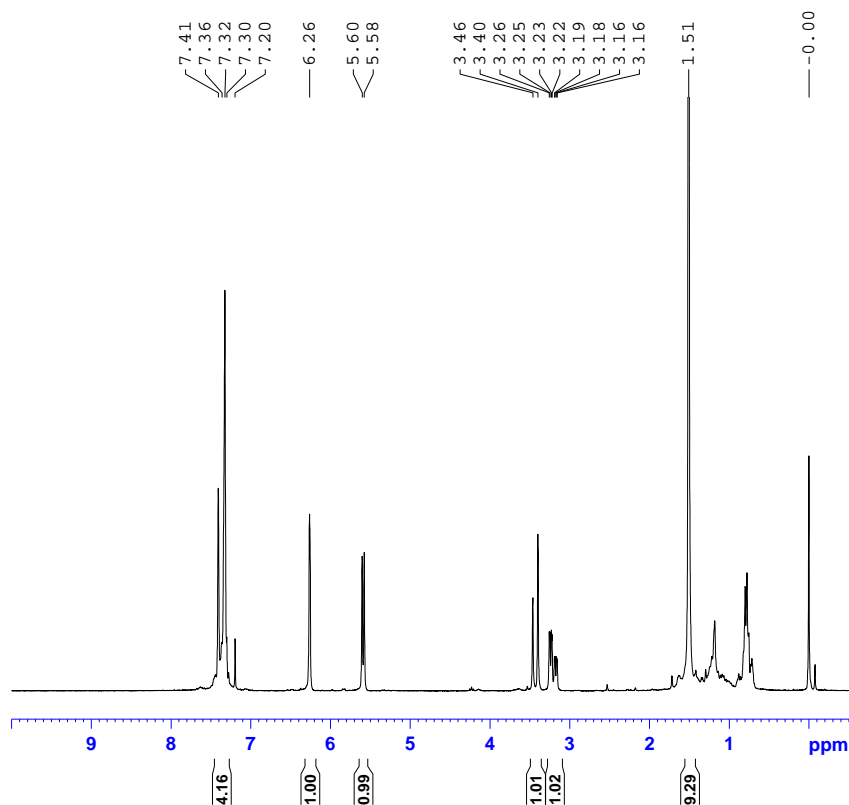

```

NAME      jwq-451d-065g1
EXPNO    10
PROCNO    1
Date_     20130308
Time      21.30
INSTRUM   spect
PROBHD    5 mm DUL 13C-1
PULPROG   zg30
TD         65536
SOLVENT   CDCl3
NS         4
DS         0
SWH       8992.806 Hz
FIDRES    0.137219 Hz
AQ        3.6438515 sec
RG         114
DW        55.600 usec
DE         8.00 usec
TE        296.3 K
D1         1.00000000 sec
TD0        1

===== CHANNEL f1 =====
NUC1      1H
P1        10.30 usec
PL1       3.00 dB
SFO1      300.1324010 MHz
SI        32768
SF        300.1300252 MHz
WDW       EM
SSB       0
LB        0.30 Hz
GB         0
PC         1.00
  
```

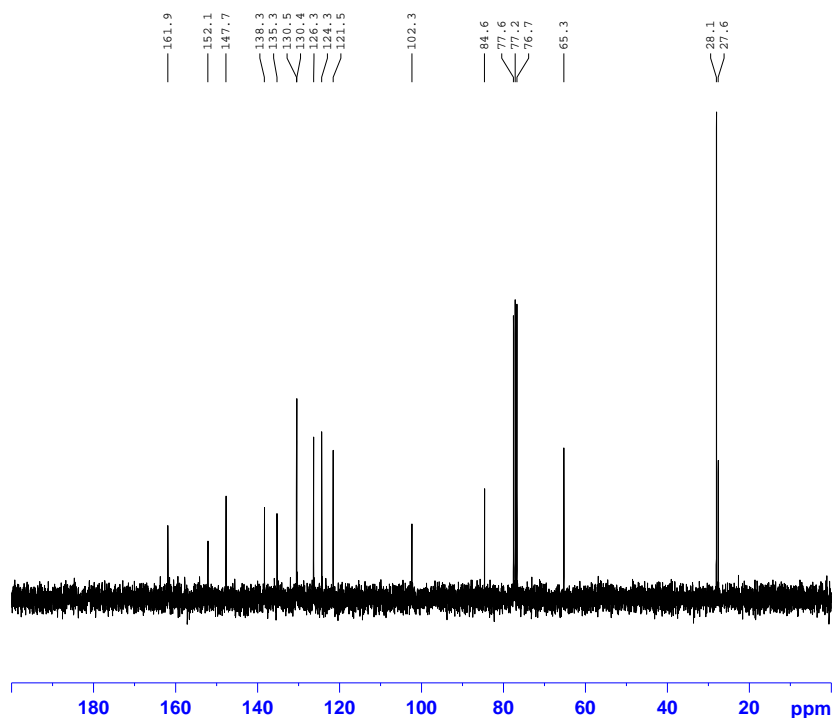

```

NAME      jwq-451d-065g1
EXPNO    11
PROCNO    1
Date_     20130308
Time      21.32
INSTRUM   spect
PROBHD    5 mm DUL 13C-1
PULPROG   zgpg30
TD         65536
SOLVENT   CDCl3
NS         26
DS         4
SWH       17985.611 Hz
FIDRES    0.274439 Hz
AQ        1.8219508 sec
RG         1024
DW        27.800 usec
DE         6.50 usec
TE        296.5 K
D1         2.00000000 sec
D11        0.03000000 sec
TD0        1

===== CHANNEL f1 =====
NUC1      13C
P1        12.50 usec
PL1       2.00 dB
SFO1      75.4752953 MHz

===== CHANNEL f2 =====
CPDPRG2   waltz16
NUC2      1H
PCPD2     100.00 usec
PL2       3.00 dB
PL12      22.74 dB
PL13      23.00 dB
SFO2      300.1312005 MHz
SI        32768
SF        75.4677410 MHz
WDW       EM
SSB       0
LB        1.00 Hz
GB         0
PC         1.40
  
```

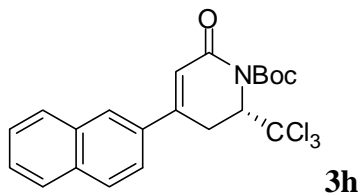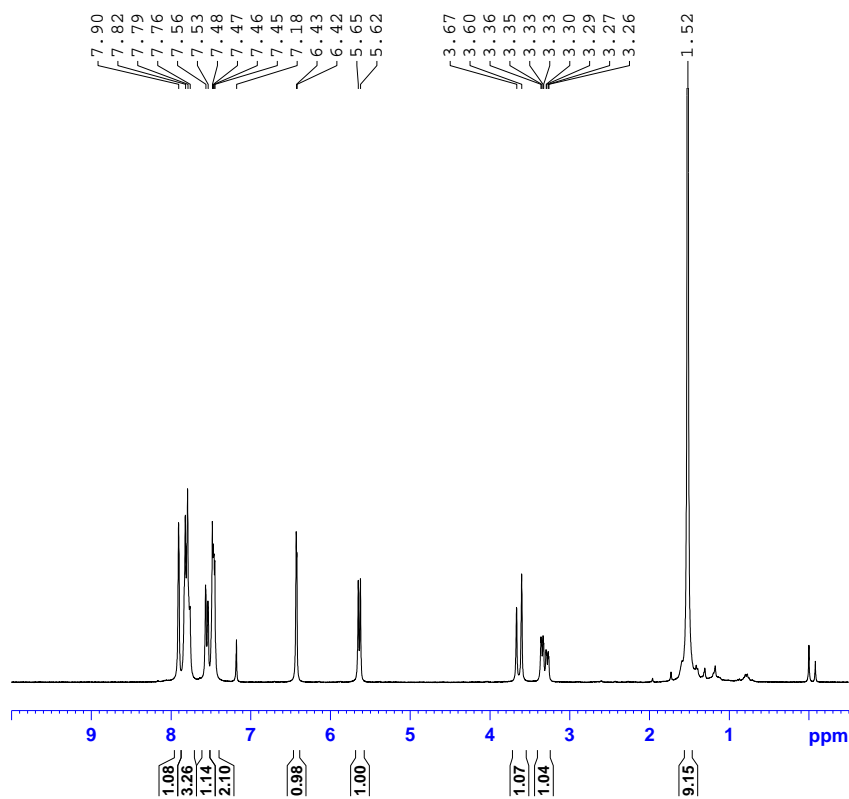

```

NAME      jwq-457e-073g1
EXPNO    11
PROCNO   1
Date_    20130328
Time     0.08
INSTRUM  spect
PROBHD   5 mm DUL 13C-1
PULPROG  zg30
TD       32768
SOLVENT  CDCl3
NS       4
DS       0
SWH      6172.839 Hz
FIDRES   0.188380 Hz
AQ       2.6542580 sec
RG       181
DW       81.000 usec
DE       6.50 usec
TE       295.2 K
D1       1.0000000 sec
TD0      1
  
```

```

===== CHANNEL f1 =====
NUC1     1H
P1       10.30 usec
PL1      3.00 dB
SFO1     300.1318534 MHz
SI       32768
SF       300.1300322 MHz
WDW      EM
SSB      0
LB       0.30 Hz
GB       0
PC       1.00
  
```

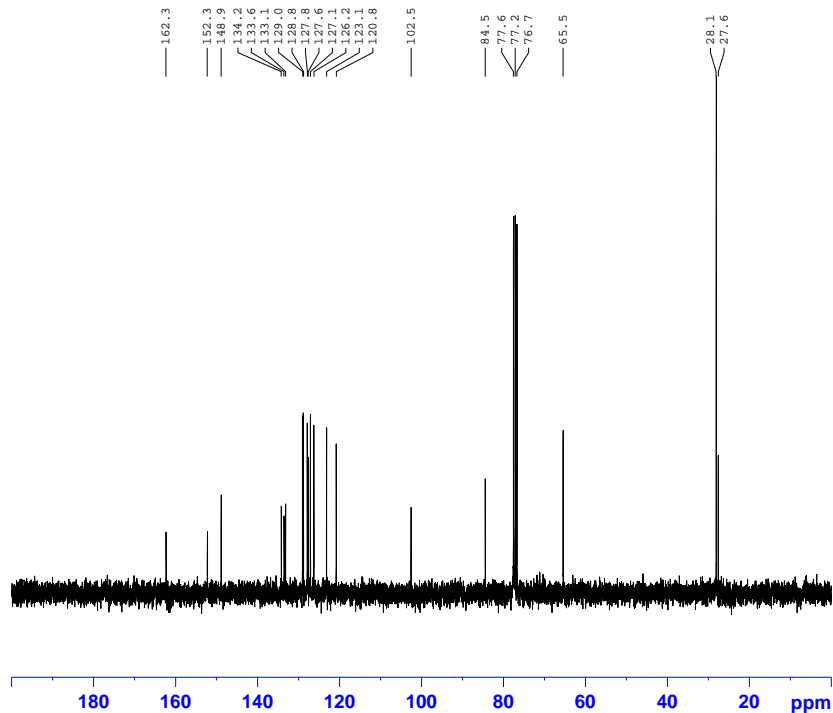

```

NAME      jwq-457e-073g1
EXPNO    10
PROCNO   1
Date_    20130328
Time     0.16
INSTRUM  spect
PROBHD   5 mm DUL 13C-1
PULPROG  zgpg30
TD       65536
SOLVENT  CDCl3
NS       87
DS       4
SWH      17985.611 Hz
FIDRES   0.274439 Hz
AQ       1.8219508 sec
RG       512
DW       27.800 usec
DE       6.50 usec
TE       295.4 K
D1       2.0000000 sec
D11      0.03000000 sec
TD0      1
  
```

```

===== CHANNEL f1 =====
NUC1     13C
P1       12.50 usec
PL1      2.00 dB
SFO1     75.4752953 MHz
  
```

```

===== CHANNEL f2 =====
CPDPRG2  waltz16
NUC2     1H
PCPD2    100.00 usec
PL2      3.00 dB
PL12     22.74 dB
PL13     23.00 dB
SFO2     300.1312005 MHz
SI       32768
SF       75.4677418 MHz
WDW      EM
SSB      0
LB       1.00 Hz
GB       0
PC       1.40
  
```

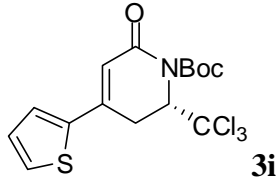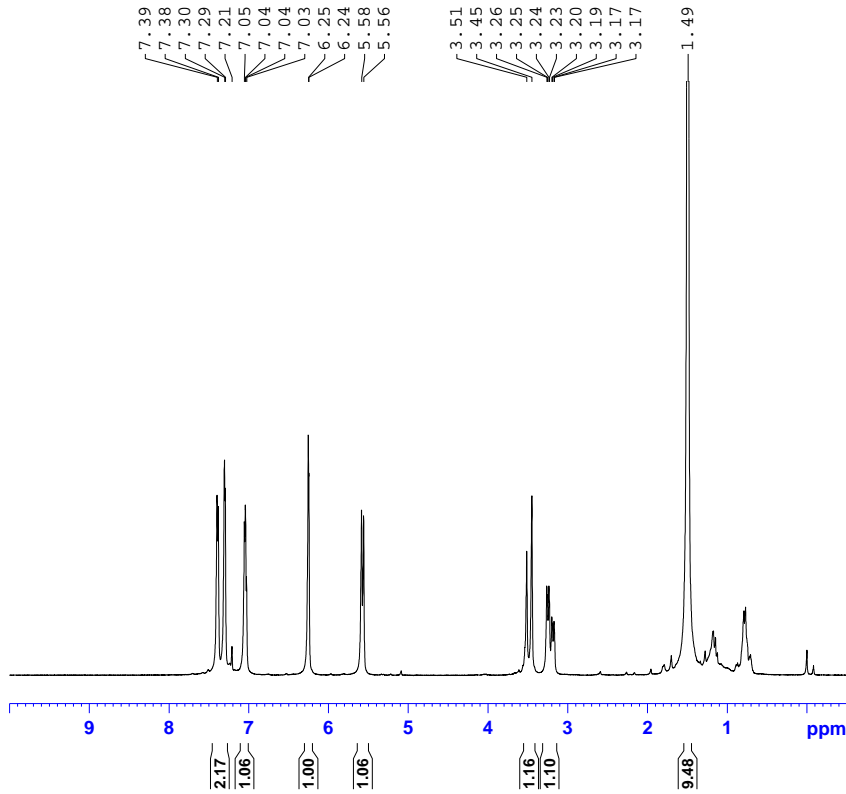

```

NAME      jwq-458a-073g1
EXPNO     20
PROCNO    1
Date_     20130328
Time      0.39
INSTRUM   spect
PROBHD    5 mm DUL 13C-1
PULPROG   zg30
TD         32768
SOLVENT   CDCl3
NS         4
DS         0
SWH       6172.839 Hz
FIDRES    0.188380 Hz
AQ         2.6542580 sec
RG         45.3
DW         81.000 usec
DE         6.50 usec
TE         295.4 K
D1         1.00000000 sec
TD0        1
  
```

```

===== CHANNEL f1 =====
NUC1      1H
P1         10.30 usec
PL1        3.00 dB
SF01      300.1318534 MHz
SI         32768
SF         300.1300227 MHz
WDW        EM
SSB        0
LB         0.30 Hz
GB         0
PC         1.00
  
```

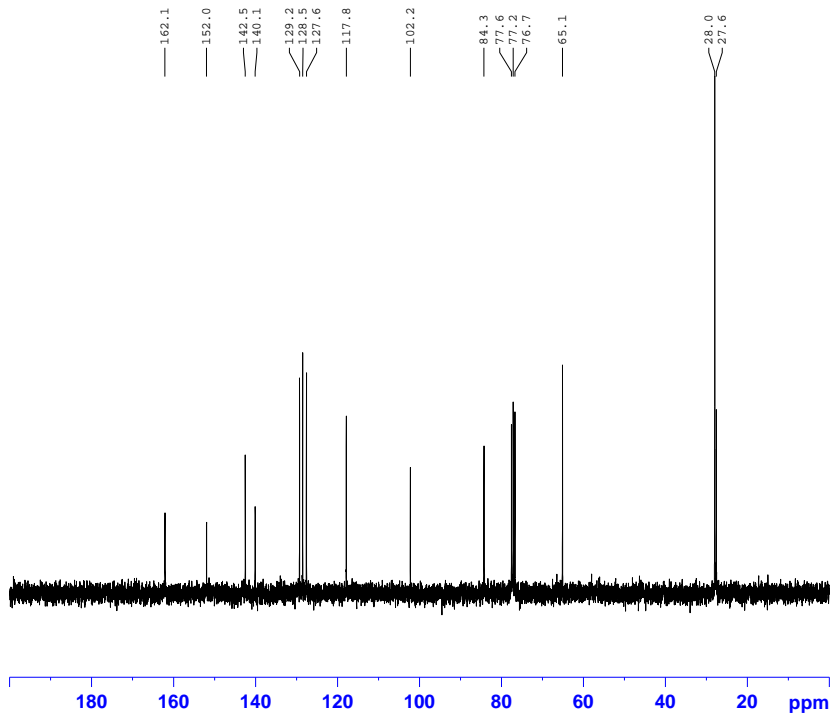

```

NAME      jwq-458a-073g1
EXPNO     21
PROCNO    1
Date_     20130328
Time      0.41
INSTRUM   spect
PROBHD    5 mm DUL 13C-1
PULPROG   zgpg30
TD         65536
SOLVENT   CDCl3
NS         26
DS         4
SWH       17985.611 Hz
FIDRES    0.274439 Hz
AQ         1.8219508 sec
RG         362
DW         27.800 usec
DE         6.50 usec
TE         295.7 K
D1         2.00000000 sec
D11        0.03000000 sec
TD0        1
  
```

```

===== CHANNEL f1 =====
NUC1      13C
P1         12.50 usec
PL1        2.00 dB
SF01      75.4752953 MHz
  
```

```

===== CHANNEL f2 =====
CPDPRG2   waltz16
NUC2      1H
PCPD2     100.00 usec
PL2        3.00 dB
PL12      22.74 dB
PL13      23.00 dB
SF02      300.1312005 MHz
SI         32768
SF         75.4677474 MHz
WDW        EM
SSB        0
LB         1.00 Hz
GB         0
PC         1.40
  
```

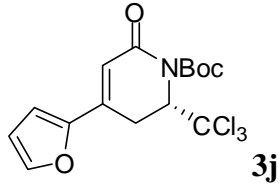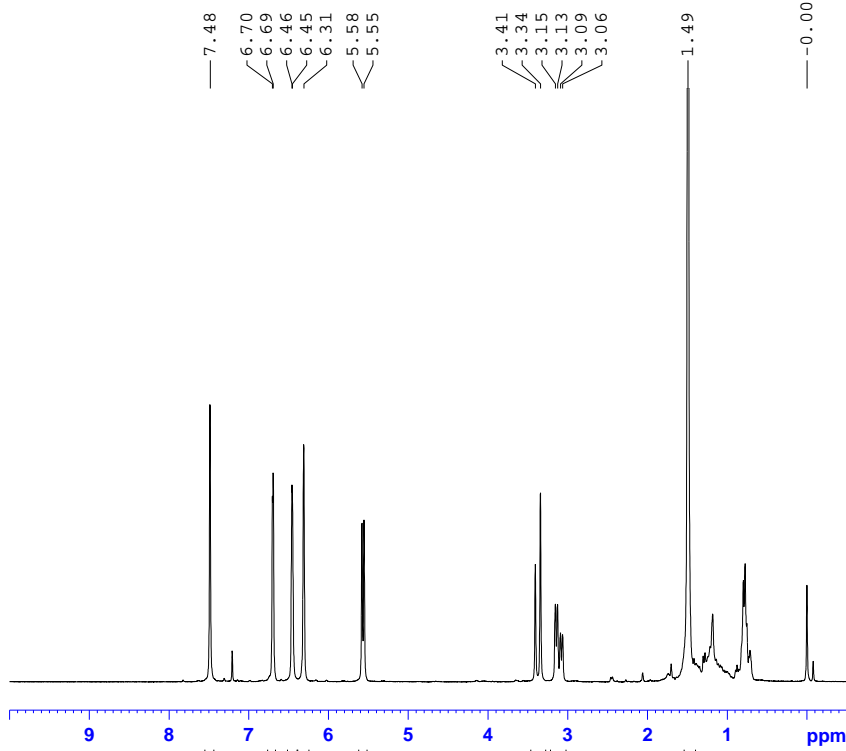

```

NAME      jwq-452d-067g1
EXPNO    10
PROCNO    1
Date_     20130308
Time      21.23
INSTRUM   spect
PROBHD    5 mm DUL 13C-1
PULPROG   zg30
TD         65536
SOLVENT   CDCl3
NS         4
DS         0
SWH        8992.806 Hz
FIDRES     0.137219 Hz
AQ         3.6438515 sec
RG         64
DW         55.600 usec
DE         8.00 usec
TE         296.3 K
D1         1.00000000 sec
TD0        1

===== CHANNEL f1 =====
NUC1      1H
P1         10.30 usec
PL1        3.00 dB
SFO1      300.1324010 MHz
SI         32768
SF         300.1300215 MHz
WDW        EM
SSB        0
LB         0.30 Hz
GB         0
PC         1.00

```

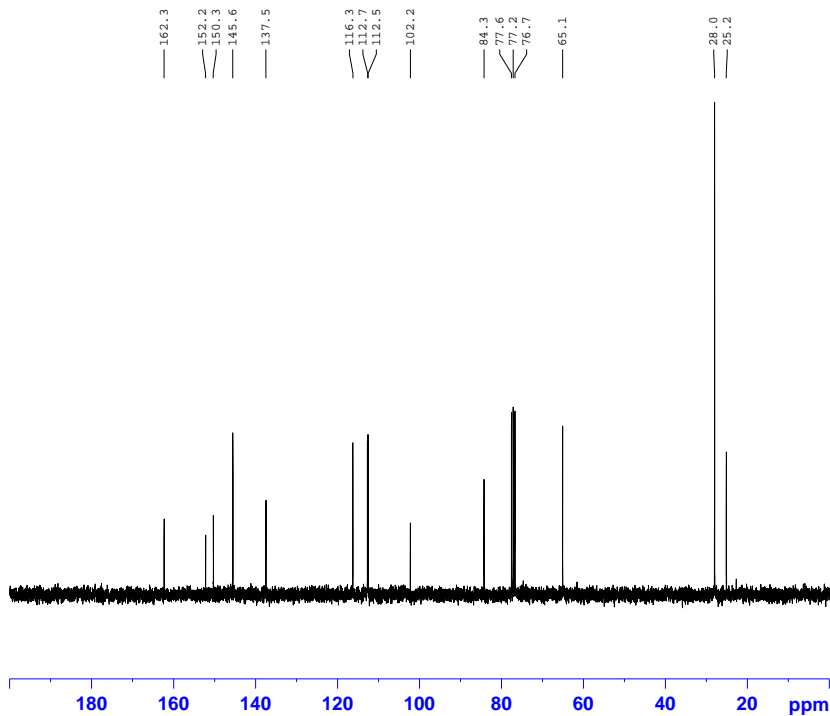

```

NAME      jwq-452d-067g1
EXPNO    11
PROCNO    1
Date_     20130308
Time      21.25
INSTRUM   spect
PROBHD    5 mm DUL 13C-1
PULPROG   zgpg30
TD         65536
SOLVENT   CDCl3
NS         30
DS         4
SWH        17985.611 Hz
FIDRES     0.274439 Hz
AQ         1.8219508 sec
RG         812.7
DW         27.800 usec
DE         6.50 usec
TE         296.5 K
D1         2.00000000 sec
D11        0.03000000 sec
TD0        1

===== CHANNEL f1 =====
NUC1      13C
P1         12.50 usec
PL1        2.00 dB
SFO1      75.4752953 MHz

===== CHANNEL f2 =====
CPDPRG2   waltz16
NUC2      1H
PCPD2     100.00 usec
PL2        3.00 dB
PL12       22.74 dB
PL13       23.00 dB
SFO2      300.1312005 MHz
SI         32768
SF         75.4677430 MHz
WDW        EM
SSB        0
LB         1.00 Hz
GB         0
PC         1.40

```

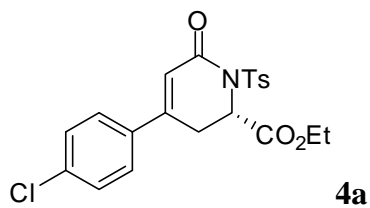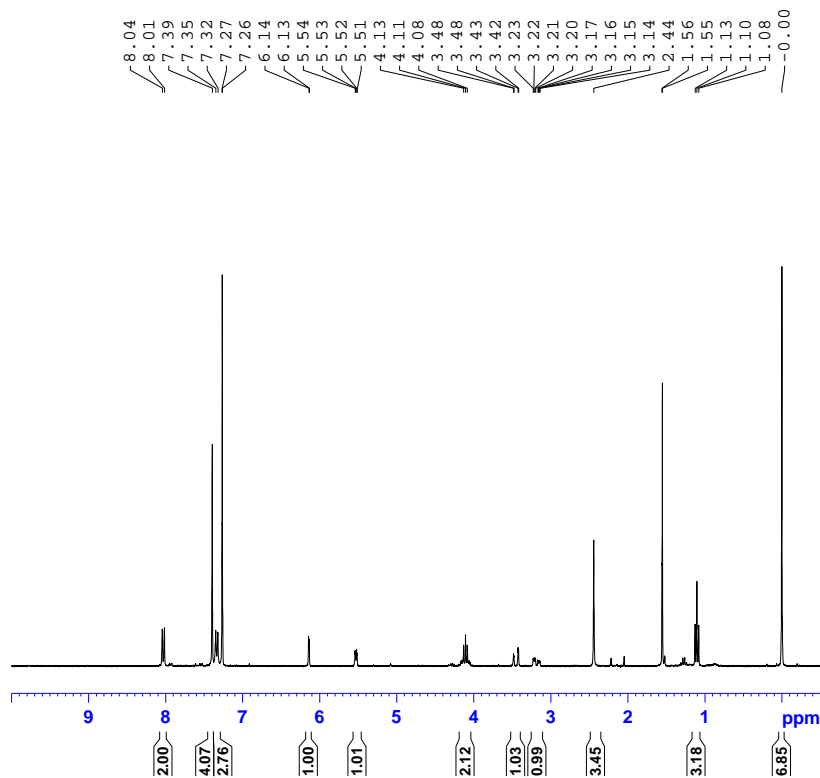

```

NAME      jwq-471b-086g1
EXPNO    10
PROCNO   1
Date_    20130413
Time     16.53
INSTRUM  spect
PROBHD   5 mm DUL 13C-1
PULPROG  zg30
TD        32768
SOLVENT  CDCl3
NS        15
DS        0
SWH       6172.839 Hz
FIDRES    0.188380 Hz
AQ         2.6542580 sec
RG         574.7
DW         81.000 usec
DE         6.50 usec
TE         294.8 K
D1         1.00000000 sec
D11        1
TD0        1

===== CHANNEL f1 =====
NUC1      1H
P1        10.30 usec
PL1       3.00 dB
SFO1     300.1318534 MHz
SI        32768
SF        300.1300064 MHz
WDW       EM
SSB       0
LB        0.30 Hz
GB        0
PC        1.00
  
```

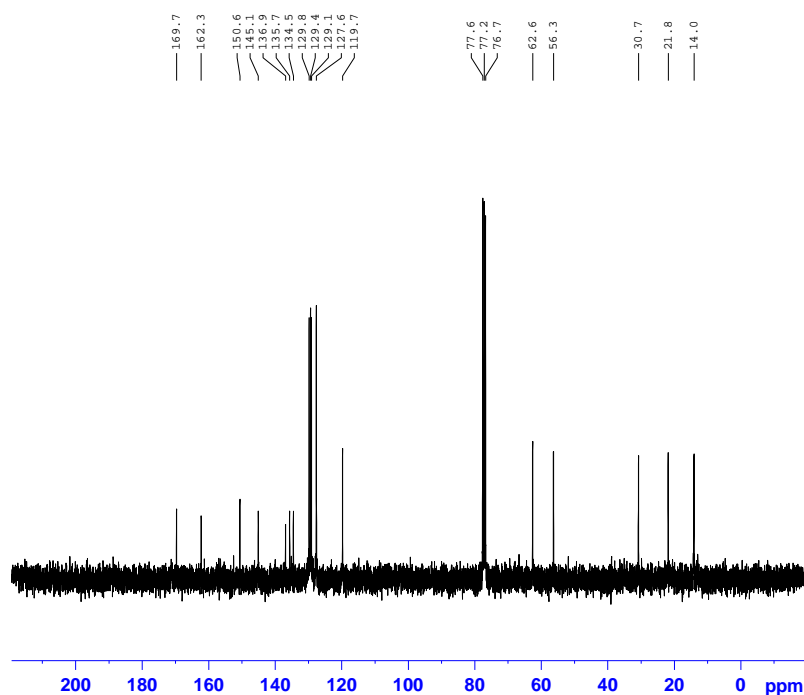

```

NAME      jwq-337a-037g1
EXPNO    20
PROCNO   1
Date_    20121015
Time     18.55
INSTRUM  spect
PROBHD   5 mm DUL 13C-1
PULPROG  zgpg30
TD        65536
SOLVENT  CDCl3
NS        167
DS        4
SWH       17985.611 Hz
FIDRES    0.274439 Hz
AQ         1.8219508 sec
RG         1024
DW         27.800 usec
DE         6.50 usec
TE         296.9 K
D1         2.00000000 sec
D11        0.03000000 sec
TD0        1

===== CHANNEL f1 =====
NUC1      13C
P1        12.50 usec
PL1       2.00 dB
SFO1     75.4752953 MHz

===== CHANNEL f2 =====
CPDPRG2  waltz16
NUC2      1H
PCPD2    100.00 usec
PL2       3.00 dB
PL12     22.74 dB
PL13     23.00 dB
SFO2     300.1312005 MHz
SI        32768
SF        75.4677406 MHz
WDW       EM
SSB       0
LB        1.00 Hz
GB        0
PC        1.40
  
```

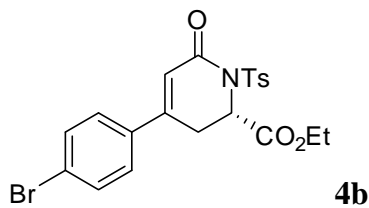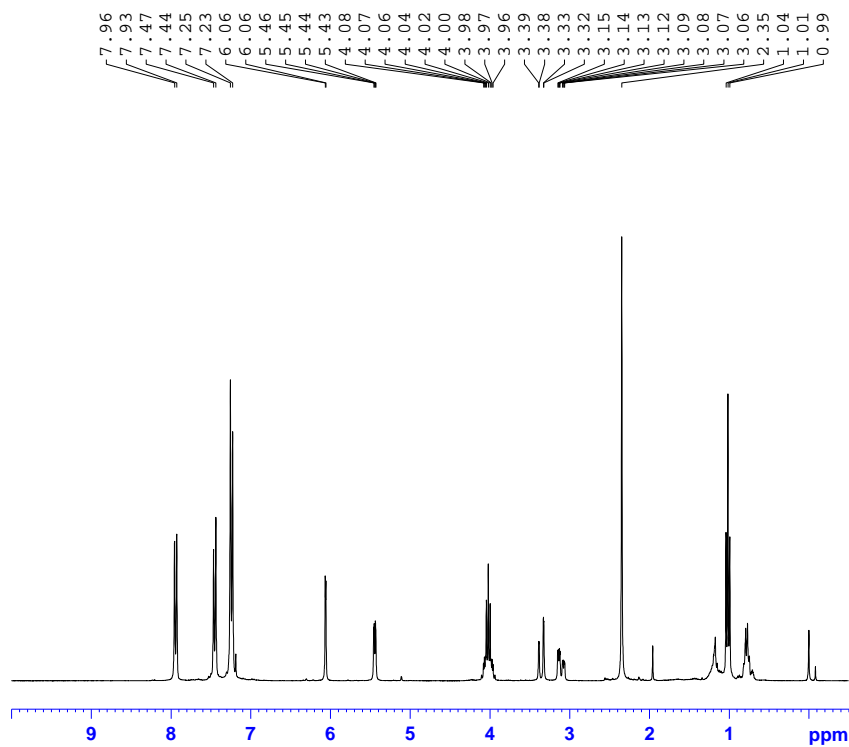

```

NAME      jwq-390c-xxxg1
EXPNO    10
PROCNO   1
Date_    20121128
Time     23.34
INSTRUM  spect
PROBHD   5 mm DUL 13C-1
PULPROG  zg30
TD       65536
SOLVENT  CDCl3
NS       6
DS       0
SWH      8992.806 Hz
FIDRES   0.137219 Hz
AQ       3.6438515 sec
RG       71.8
DW       55.600 usec
DE       8.00 usec
TE       296.6 K
D1       1.00000000 sec
TDO     1
===== CHANNEL f1 =====
NUC1     1H
P1       10.30 usec
PL1      3.00 dB
SFO1    300.1324010 MHz
SI       32768
SF       300.1300276 MHz
WDW      EM
SSB      0
LB       0.30 Hz
GB       0
PC       1.00

```

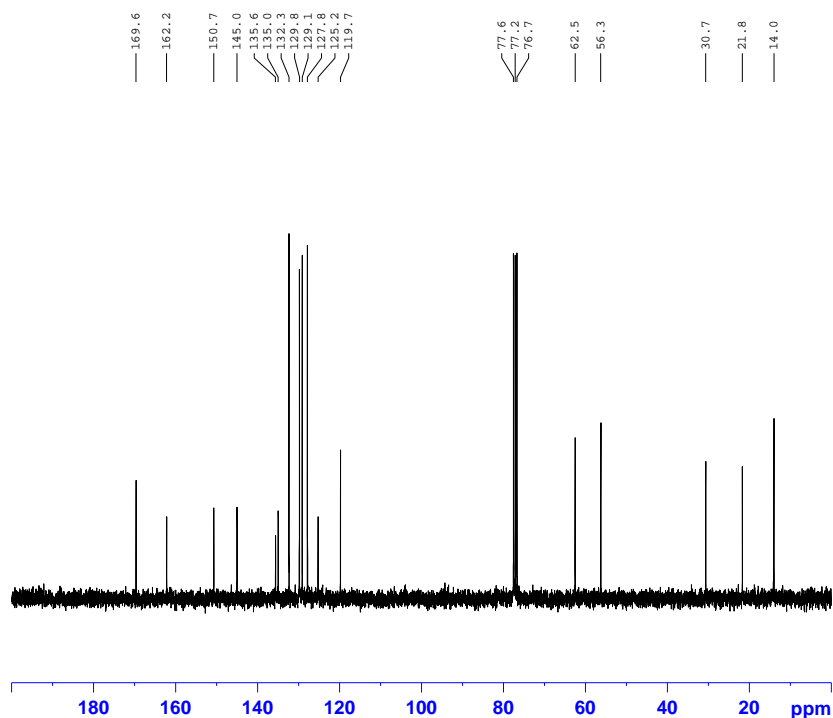

```

NAME      jwq-390c-xxxg1
EXPNO    11
PROCNO   1
Date_    20121128
Time     23.37
INSTRUM  spect
PROBHD   5 mm DUL 13C-1
PULPROG  zgpg30
TD       65536
SOLVENT  CDCl3
NS       48
DS       4
SWH      17985.611 Hz
FIDRES   0.274439 Hz
AQ       1.8219508 sec
RG       512
DW       27.800 usec
DE       6.50 usec
TE       297.0 K
D1       2.00000000 sec
D11     0.03000000 sec
TDO     1
===== CHANNEL f1 =====
NUC1     13C
P1       12.50 usec
PL1      2.00 dB
SFO1    75.4752953 MHz
===== CHANNEL f2 =====
CPDPRG2  waltz16
NUC2     1H
PCPD2    100.00 usec
PL2      3.00 dB
PL12     22.74 dB
PL13     23.00 dB
SFO2    300.1312005 MHz
SI       32768
SF       75.4677448 MHz
WDW      EM
SSB      0
LB       1.00 Hz
GB       0
PC       1.40

```



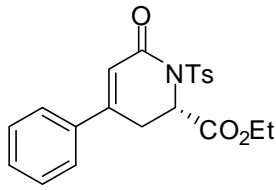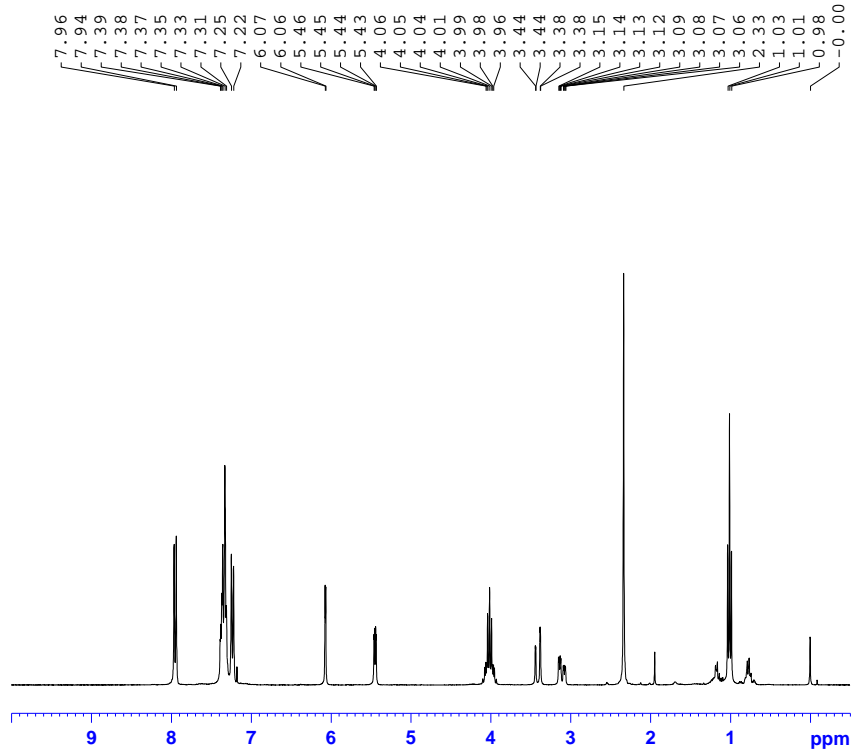

```

NAME      jwq-388a-088g1
EXPNO    10
PROCNO    1
Date_     20121127
Time      12.02
INSTRUM   spect
PROBHD    5 mm DUL 13C-1
PULPROG   zg30
TD         65536
SOLVENT   CDCl3
NS         3
DS         0
SWH        8992.806 Hz
FIDRES     0.137219 Hz
AQ         3.6438515 sec
RG         64
DW         55.600 usec
DE         8.00 usec
TE         297.3 K
D1         1.00000000 sec
TD0        1

===== CHANNEL f1 =====
NUC1       1H
P1         10.30 usec
PL1        3.00 dB
SF01       300.1324010 MHz
SI         32768
SF         300.1300310 MHz
WDW        EM
SSB        0
LB         0.30 Hz
GB         0
PC         1.00

```

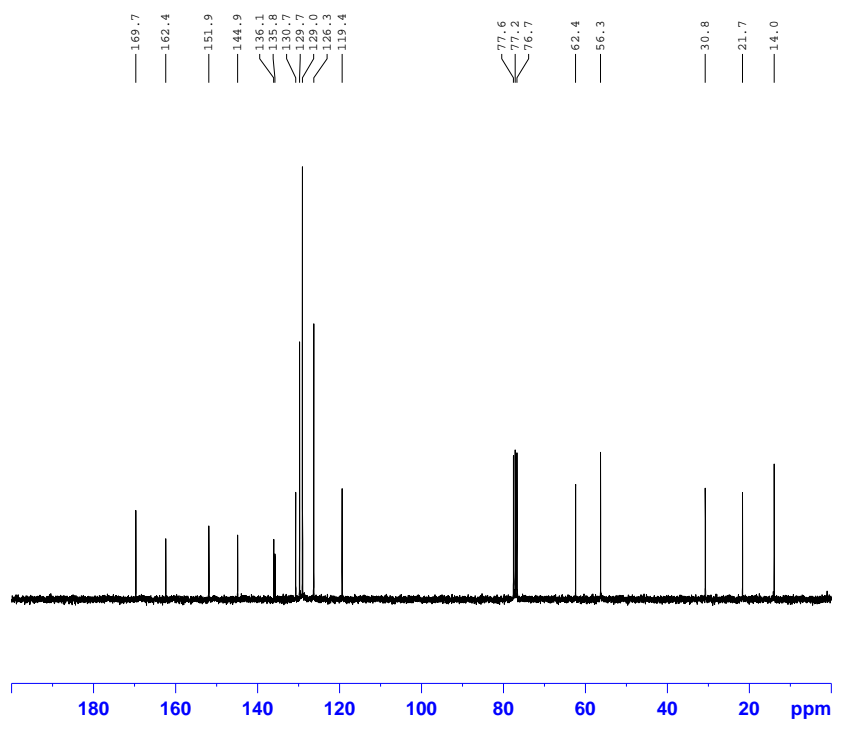

```

NAME      jwq-388a-088g1
EXPNO    11
PROCNO    1
Date_     20121127
Time      12.07
INSTRUM   spect
PROBHD    5 mm DUL 13C-1
PULPROG   zgpg30
TD         65536
SOLVENT   CDCl3
NS         96
DS         4
SWH        17985.611 Hz
FIDRES     0.274439 Hz
AQ         1.8219508 sec
RG         512
DW         27.800 usec
DE         6.50 usec
TE         298.0 K
D1         2.00000000 sec
D11        0.03000000 sec
TD0        1

===== CHANNEL f1 =====
NUC1       13C
P1         12.50 usec
PL1        2.00 dB
SF01       75.4752953 MHz

===== CHANNEL f2 =====
CPDPRG2   waltz16
NUC2       1H
PCPD2     100.00 usec
PL2        3.00 dB
PL12       22.74 dB
PL13       23.00 dB
SF02       300.1312005 MHz
SI         32768
SF         75.4677474 MHz
WDW        EM
SSB        0
LB         1.00 Hz
GB         0
PC         1.40

```

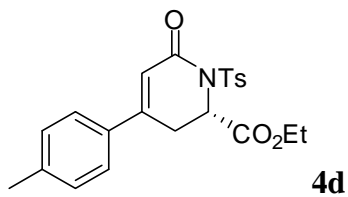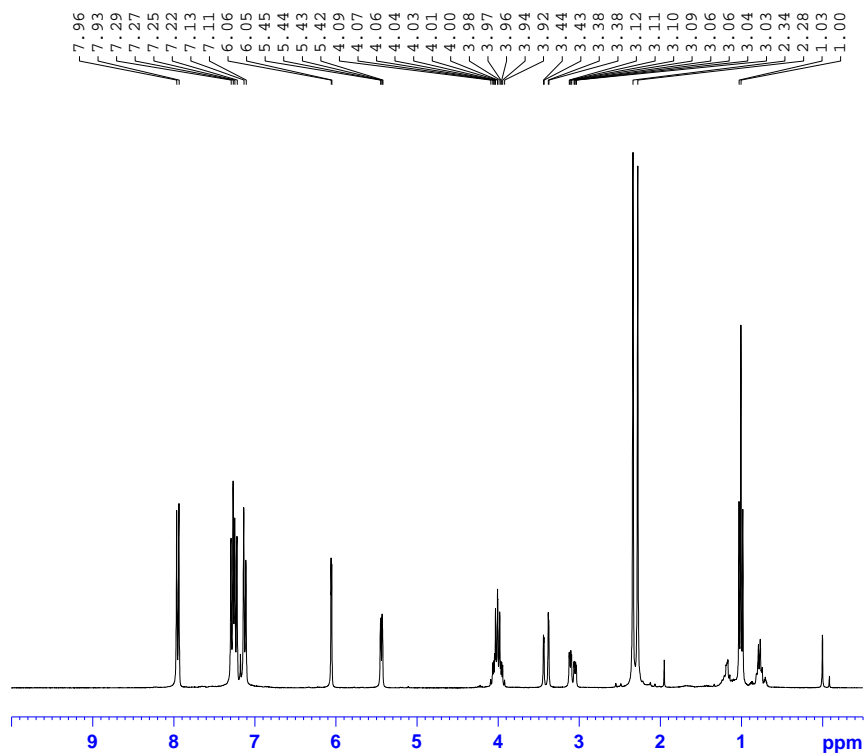

```

NAME      jwq-391c-092g1
EXPNO     10
PROCNO    1
Date_     20121203
Time      13.05
INSTRUM   spect
PROBHD    5 mm DUL 13C-1
PULPROG   zg30
TD         65536
SOLVENT   CDCl3
NS         5
DS         0
SWH        8992.806 Hz
FIDRES     0.137219 Hz
AQ         3.6438515 sec
RG         64
DW         55.600 usec
DE         8.00 usec
TE         295.5 K
D1         1.00000000 sec
TDO        1

===== CHANNEL f1 =====
NUC1      1H
P1         10.30 usec
PL1        3.00 dB
SFO1      300.1324010 MHz
SI         32768
SF         300.1300310 MHz
WDW        EM
SSB        0
LB         0.30 Hz
GB         0
PC         1.00
  
```

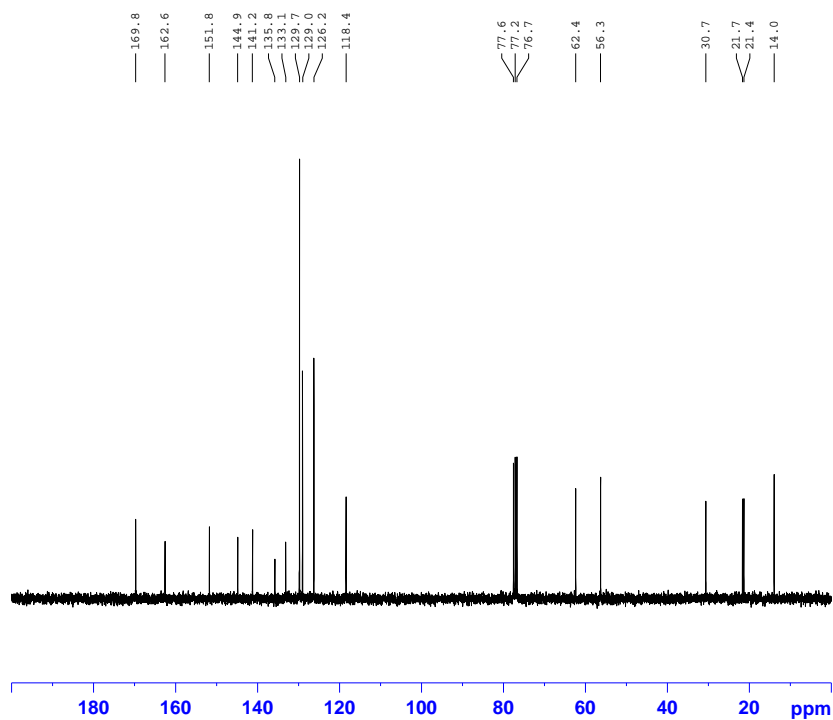

```

NAME      jwq-391c-092g1
EXPNO     11
PROCNO    1
Date_     20121203
Time      13.06
INSTRUM   spect
PROBHD    5 mm DUL 13C-1
PULPROG   zgpg30
TD         65536
SOLVENT   CDCl3
NS         44
DS         4
SWH        17985.611 Hz
FIDRES     0.274439 Hz
AQ         1.8219508 sec
RG         1149.4
DW         27.800 usec
DE         6.50 usec
TE         295.7 K
D1         2.00000000 sec
D11        0.03000000 sec
TDO        1

===== CHANNEL f1 =====
NUC1      13C
P1         12.50 usec
PL1        2.00 dB
SFO1      75.4752953 MHz

===== CHANNEL f2 =====
CPDPRG2   waltz16
NUC2      1H
PCPD2     100.00 usec
PL2        3.00 dB
PL12       22.74 dB
PL13       23.00 dB
SFO2      300.1312005 MHz
SI         32768
SF         75.4677470 MHz
WDW        EM
SSB        0
LB         1.00 Hz
GB         0
PC         1.40
  
```

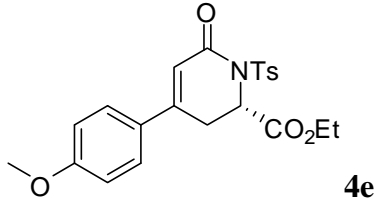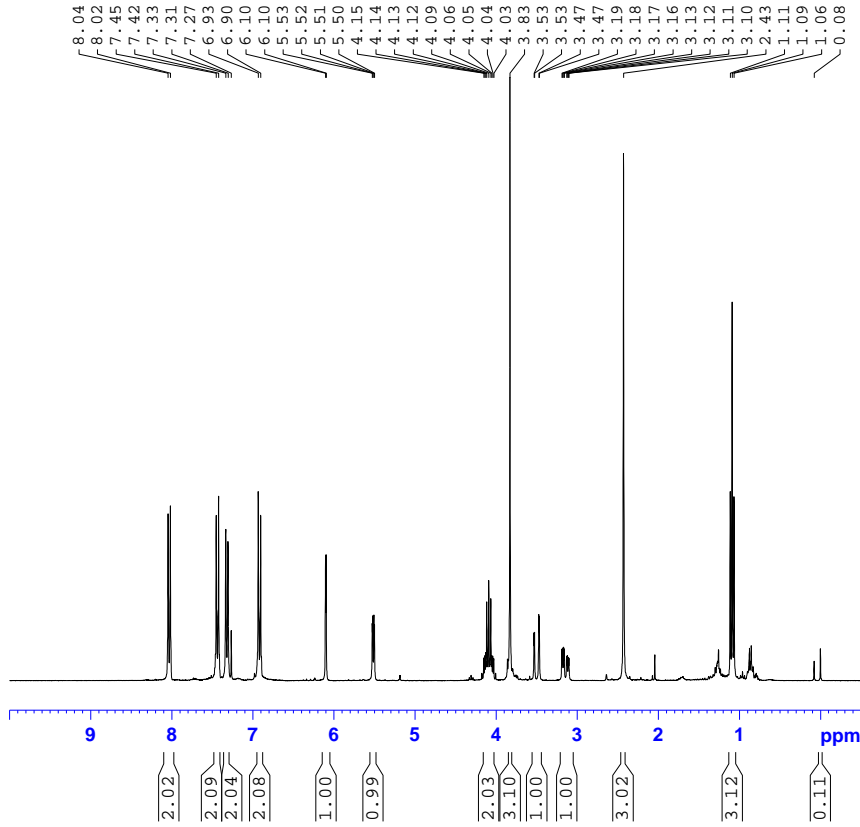

```

NAME      jwq-395a-001g1
EXPNO    10
PROCNO   1
Date_    20121206
Time     20.59
INSTRUM  spect
PROBHD   5 mm DUL 13C-1
PULPROG  zg30
TD        65536
SOLVENT  CDCl3
NS        3
DS        0
SWH      8992.806 Hz
FIDRES   0.137219 Hz
AQ        3.6438515 sec
RG        128
DW        55.600 usec
DE        8.00 usec
TE        295.3 K
D1        1.00000000 sec
TD0       1

===== CHANNEL f1 =====
NUC1      1H
P1        10.30 usec
PL1       3.00 dB
SFO1     300.1324010 MHz
SI        32768
SF        300.1300043 MHz
WDW       EM
SSB       0
LB        0.30 Hz
GB        0
PC        1.00
  
```

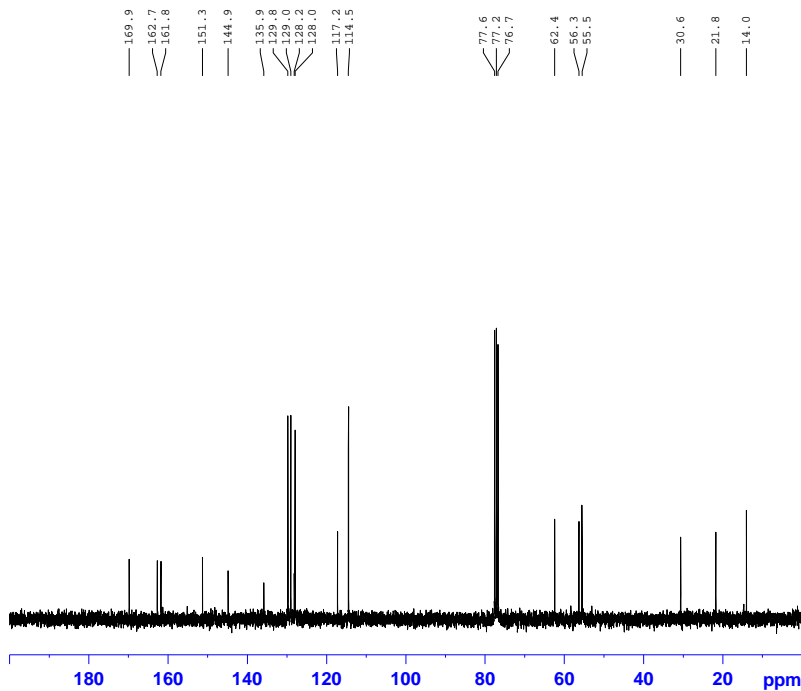

```

NAME      jwq-395a-001g1
EXPNO    11
PROCNO   1
Date_    20121206
Time     21.02
INSTRUM  spect
PROBHD   5 mm DUL 13C-1
PULPROG  zgpg30
TD        65536
SOLVENT  CDCl3
NS        42
DS        4
SWH      17985.611 Hz
FIDRES   0.274439 Hz
AQ        1.8219508 sec
RG        2298.8
DW        27.800 usec
DE        6.50 usec
TE        295.8 K
D1        2.00000000 sec
D11      0.03000000 sec
TD0       1

===== CHANNEL f1 =====
NUC1      13C
P1        12.50 usec
PL1       2.00 dB
SFO1     75.4752953 MHz

===== CHANNEL f2 =====
CPDPRG2  waltz16
NUC2      1H
PCPD2    100.00 usec
PL2       3.00 dB
PL12     22.74 dB
PL13     23.00 dB
SFO2    300.1312005 MHz
SI        32768
SF        75.4677428 MHz
WDW       EM
SSB       0
LB        1.00 Hz
GB        0
PC        1.40
  
```

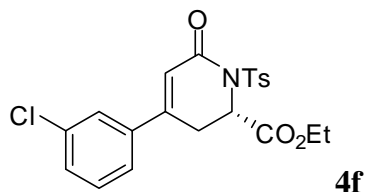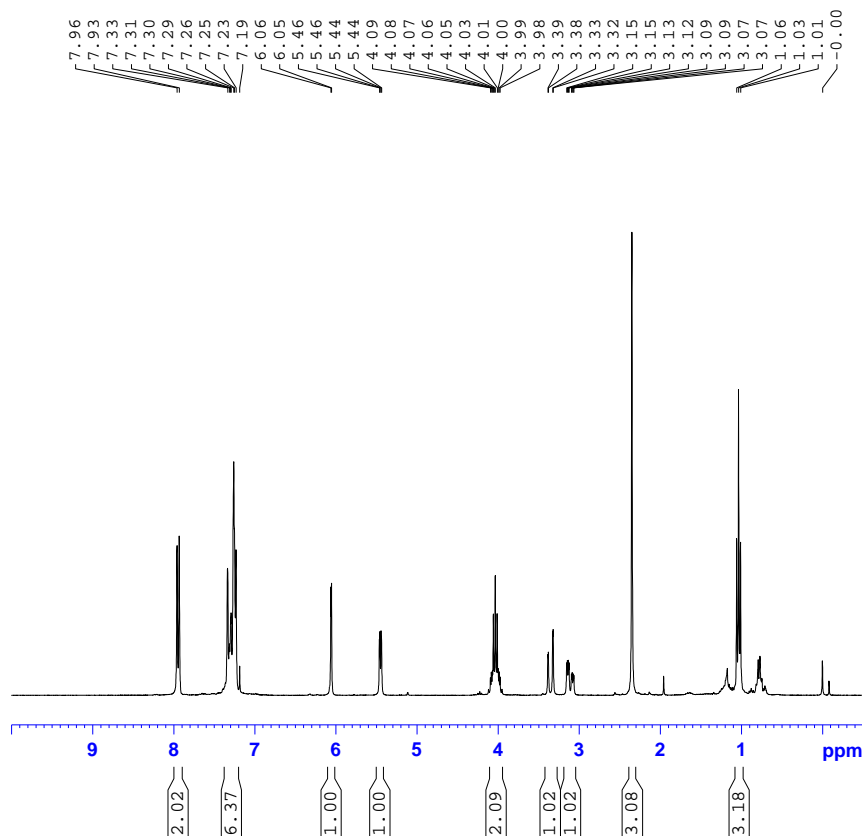

```

NAME      jwq-391a-091g1
EXPNO     10
PROCNO    1
Date_     20121203
Time      18.54
INSTRUM   spect
PROBHD    5 mm DUL 13C-1
PULPROG   zg30
TD        65536
SOLVENT   CDCl3
NS         3
DS         0
SWH        8992.806 Hz
FIDRES     0.137219 Hz
AQ         3.6438515 sec
RG         71.8
DW         55.600 usec
DE         8.00 usec
TE         296.3 K
D1         1.0000000 sec
TD0        1
  
```

```

===== CHANNEL f1 =====
NUC1      1H
P1        10.30 usec
PL1       3.00 dB
SFO1      300.1324010 MHz
SI        32768
SF        300.1300279 MHz
WDW       EM
SSB       0
LB        0.30 Hz
GB        0
PC        1.00
  
```

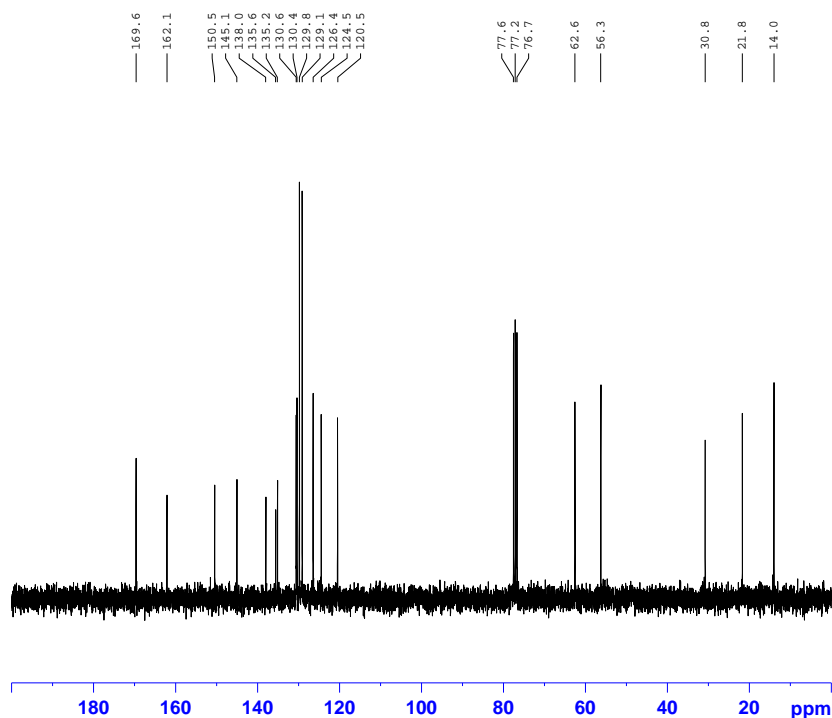

```

NAME      jwq-391a-091g1
EXPNO     11
PROCNO    1
Date_     20121203
Time      18.57
INSTRUM   spect
PROBHD    5 mm DUL 13C-1
PULPROG   zgpg30
TD        65536
SOLVENT   CDCl3
NS         31
DS         4
SWH        17985.611 Hz
FIDRES     0.274439 Hz
AQ         1.8219508 sec
RG         2580.3
DW         27.800 usec
DE         6.50 usec
TE         296.6 K
D1         2.0000000 sec
D11        0.0300000 sec
TD0        1
  
```

```

===== CHANNEL f1 =====
NUC1      13C
P1        12.50 usec
PL1       2.00 dB
SFO1      75.4752953 MHz
  
```

```

===== CHANNEL f2 =====
CPDPRG2   waltz16
NUC2      1H
PCPD2     100.00 usec
PL2       3.00 dB
PL12      22.74 dB
PL13      23.00 dB
SFO2      300.1312005 MHz
SI        32768
SF        75.4677445 MHz
WDW       EM
SSB       0
LB        1.00 Hz
GB        0
PC        1.40
  
```

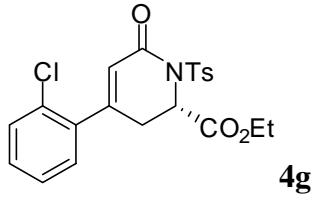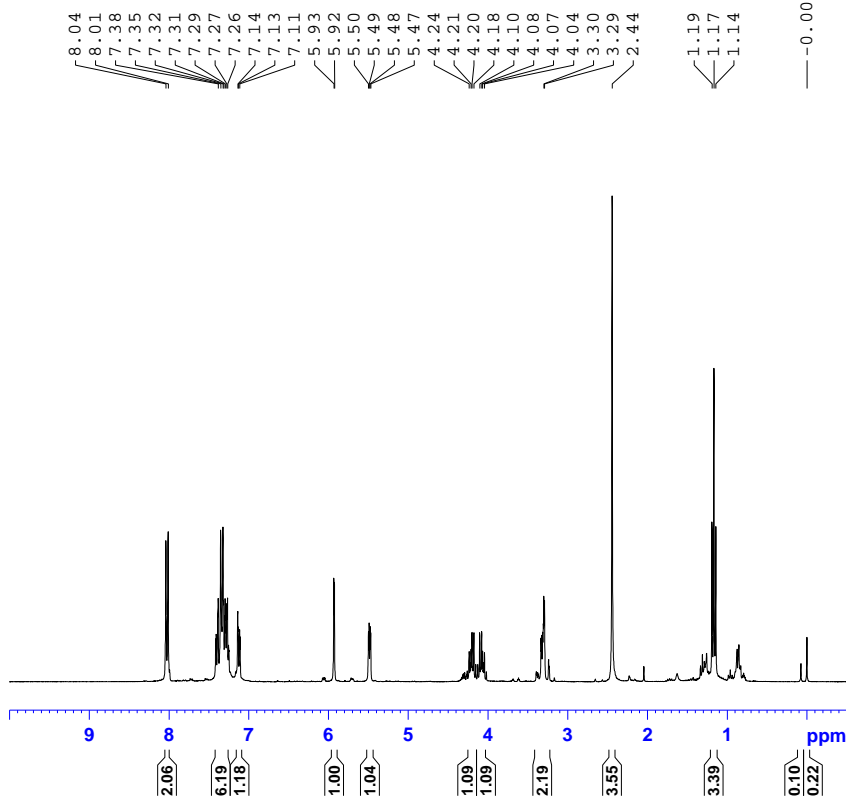

```

NAME      jwq-392c-093g1
EXPNO     10
PROCNO    1
Date_     20121203
Time      18.42
INSTRUM   spect
PROBHD    5 mm DUL 13C-1
PULPROG   zg30
TD        65536
SOLVENT   CDCl3
NS        16
DS        0
SWH       8992.806 Hz
FIDRES    0.137219 Hz
AQ        3.6438515 sec
RG        181
DW        55.600 usec
DE        8.00 usec
TE        296.1 K
D1        1.00000000 sec
TD0       1

===== CHANNEL f1 =====
NUC1      1H
P1        10.30 usec
PL1       3.00 dB
SFO1     300.1324010 MHz
SI        32768
SF        300.1300047 MHz
WDW       EM
SSB       0
LB        0.30 Hz
GB        0
PC        1.00

```

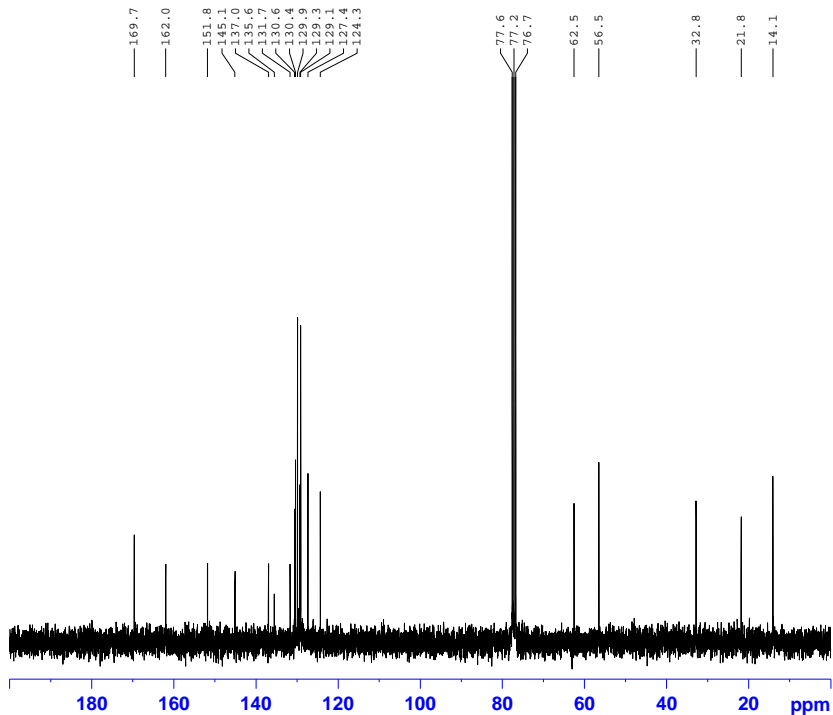

```

NAME      jwq-392c-093g1
EXPNO     10
PROCNO    1
Date_     20121203
Time      18.46
INSTRUM   spect
PROBHD    5 mm DUL 13C-1
PULPROG   zgpg30
TD        65536
SOLVENT   CDCl3
NS        88
DS        4
SWH       17985.611 Hz
FIDRES    0.274439 Hz
AQ        1.8219508 sec
RG        3251
DW        27.800 usec
DE        6.50 usec
TE        296.7 K
D1        2.00000000 sec
D11       0.03000000 sec
TD0       1

===== CHANNEL f1 =====
NUC1      13C
P1        12.50 usec
PL1       2.00 dB
SFO1     75.4752953 MHz

===== CHANNEL f2 =====
CPDPRG2   waltz16
NUC2      1H
PCPD2     100.00 usec
PL2       3.00 dB
PL12     22.74 dB
PL13     23.00 dB
SFO2     300.1312005 MHz
SI        32768
SF        75.4677403 MHz
WDW       EM
SSB       0
LB        1.00 Hz
GB        0
PC        1.40

```

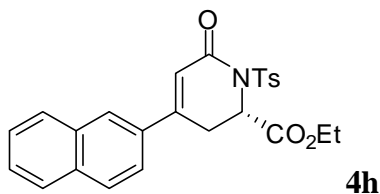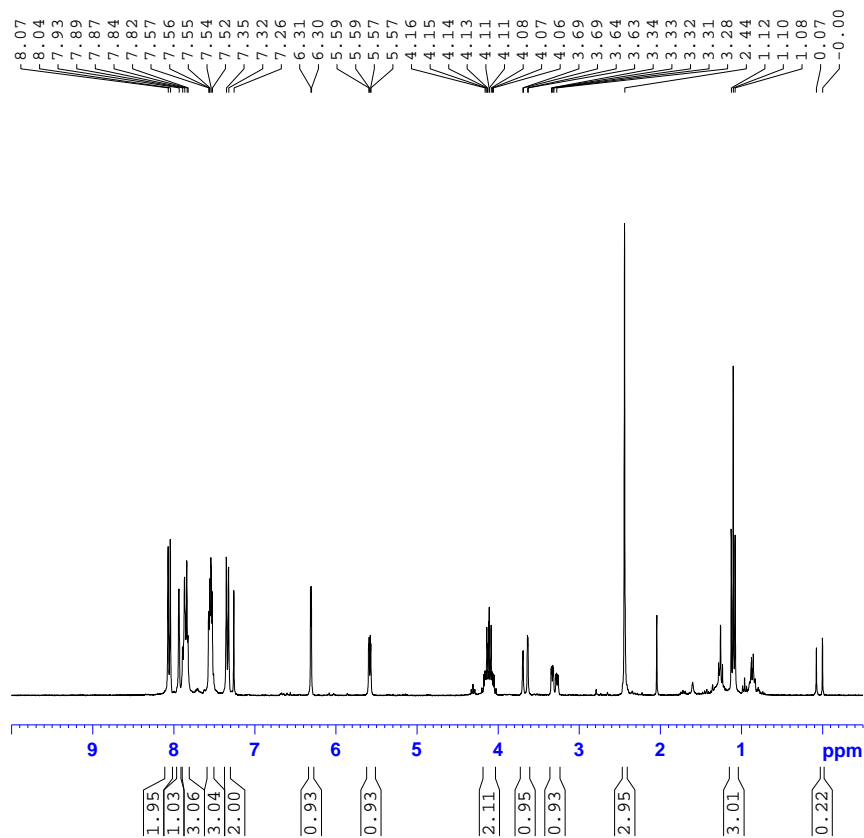

```

NAME      jwq-393d-094g1
EXPNO    10
PROCNO   1
Date_    20121204
Time     13.35
INSTRUM  spect
PROBHD   5 mm DUL 13C-1
PULPROG  zg30
TD       65536
SOLVENT  CDCl3
NS       3
DS       0
SWH      8992.806 Hz
FIDRES   0.137219 Hz
AQ       3.6438515 sec
RG       228.1
DW       55.600 usec
DE       8.00 usec
TE       296.6 K
D1       1.0000000 sec
TD0      1
  
```

```

===== CHANNEL f1 =====
NUC1     1H
P1       10.30 usec
PL1      3.00 dB
SFO1     300.1324010 MHz
SI       32768
SF       300.1300069 MHz
WDW      EM
SSB      0
LB       0.30 Hz
GB       0
PC       1.00
  
```

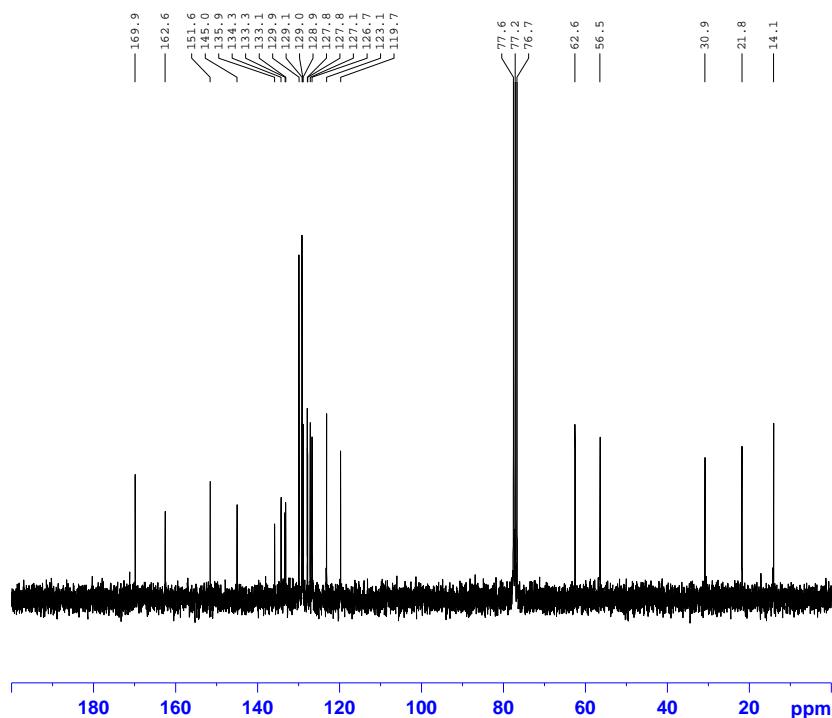

```

NAME      jwq-393d-094g1
EXPNO    11
PROCNO   1
Date_    20121204
Time     13.39
INSTRUM  spect
PROBHD   5 mm DUL 13C-1
PULPROG  zgpg30
TD       65536
SOLVENT  CDCl3
NS       4
DS       247
SWH      17985.611 Hz
FIDRES   0.274439 Hz
AQ       1.8219508 sec
RG       645.1
DW       27.800 usec
DE       6.50 usec
TE       297.2 K
D1       2.0000000 sec
D11      0.03000000 sec
TD0      1
  
```

```

===== CHANNEL f1 =====
NUC1     13C
P1       12.50 usec
PL1      2.00 dB
SFO1     75.4752953 MHz
  
```

```

===== CHANNEL f2 =====
CPDPRG2  waltz16
NUC2     1H
PCPD2    100.00 usec
PL2      3.00 dB
PL12     22.74 dB
PL13     23.00 dB
SFO2     300.1312005 MHz
SI       32768
SF       75.4677391 MHz
WDW      EM
SSB      0
LB       1.00 Hz
GB       0
PC       1.40
  
```

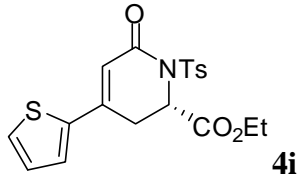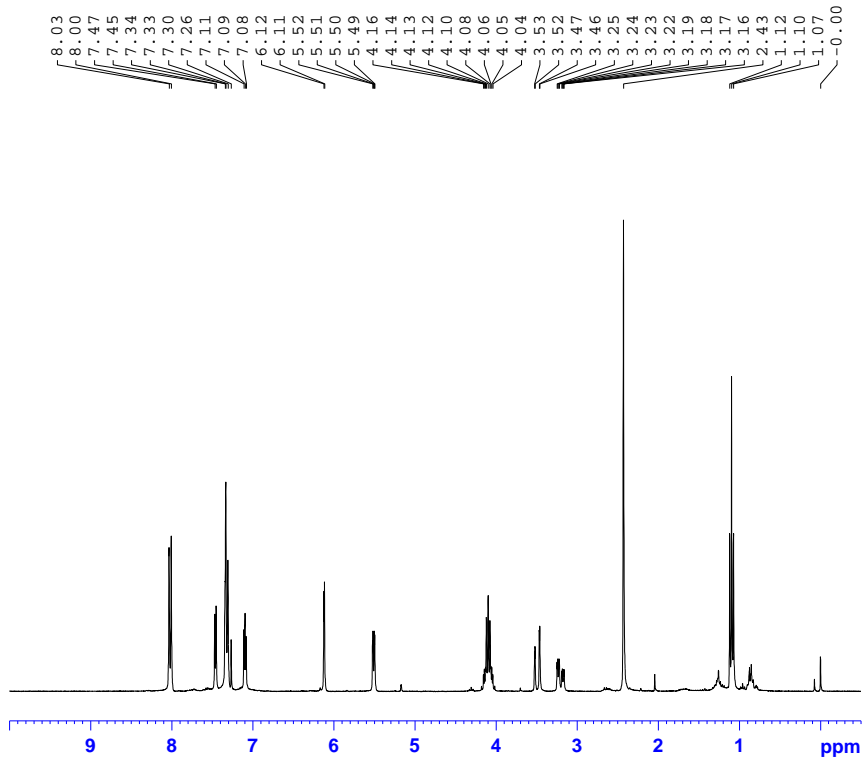

```

NAME      jwq-396a-002g1
EXPNO    10
PROCNO    1
Date_     20121206
Time      21.17
INSTRUM   spect
PROBHD    5 mm DUL 13C-1
PULPROG   zg30
TD         65536
SOLVENT   CDCl3
NS         3
DS         0
SWH       8992.806 Hz
FIDRES    0.137219 Hz
AQ        3.6438515 sec
RG        161.3
DW        55.600 usec
DE        8.00 usec
TE        295.1 K
D1        1.0000000 sec
TD0       1

```

```

===== CHANNEL f1 =====
NUC1      1H
P1        10.30 usec
PL1       3.00 dB
SFO1      300.1324010 MHz
SI        32768
SF        300.1300047 MHz
WDW       EM
SSB       0
LB        0.30 Hz
GB        0
PC        1.00

```

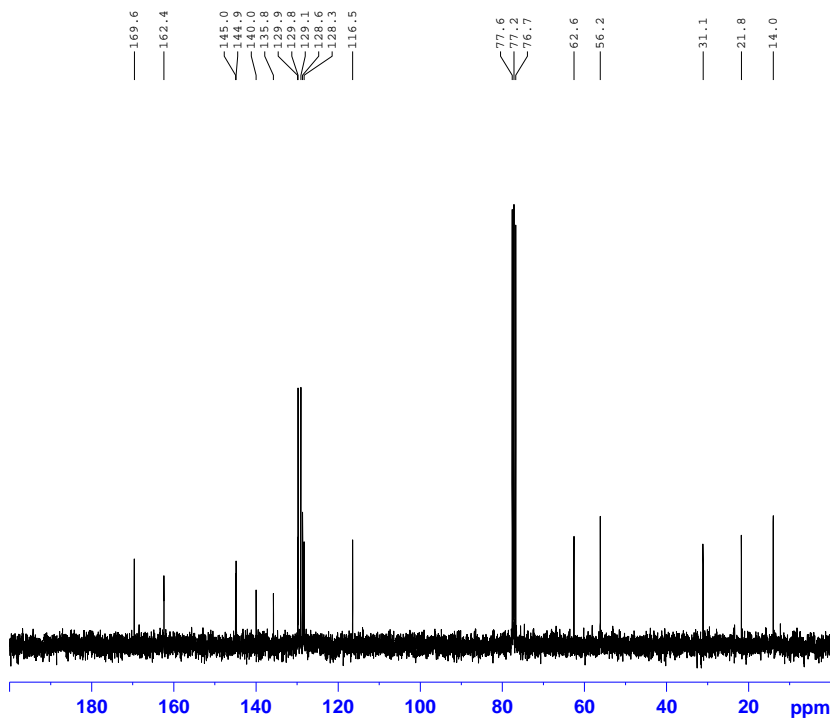

```

NAME      jwq-396a-002g1
EXPNO    1
PROCNO    1
Date_     20121206
Time      21.20
INSTRUM   spect
PROBHD    5 mm DUL 13C-1
PULPROG   zgpg30
TD         65536
SOLVENT   CDCl3
NS         42
DS         4
SWH       17985.611 Hz
FIDRES    0.274439 Hz
AQ        1.8219508 sec
RG        512
DW        27.800 usec
DE        6.50 usec
TE        295.4 K
D1        2.0000000 sec
D11       0.0300000 sec
TD0       1

```

```

===== CHANNEL f1 =====
NUC1      13C
P1        12.50 usec
PL1       2.00 dB
SFO1      75.4752953 MHz

```

```

===== CHANNEL f2 =====
CPDPRG2   waltz16
NUC2      1H
PCPD2     100.00 usec
PL2       3.00 dB
PL12      22.74 dB
PL13      23.00 dB
SFO2      300.1312005 MHz
SI        32768
SF        75.4677417 MHz
WDW       EM
SSB       0
LB        1.00 Hz
GB        0
PC        1.40

```

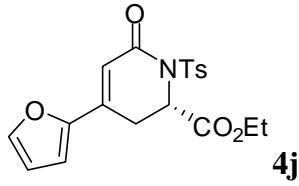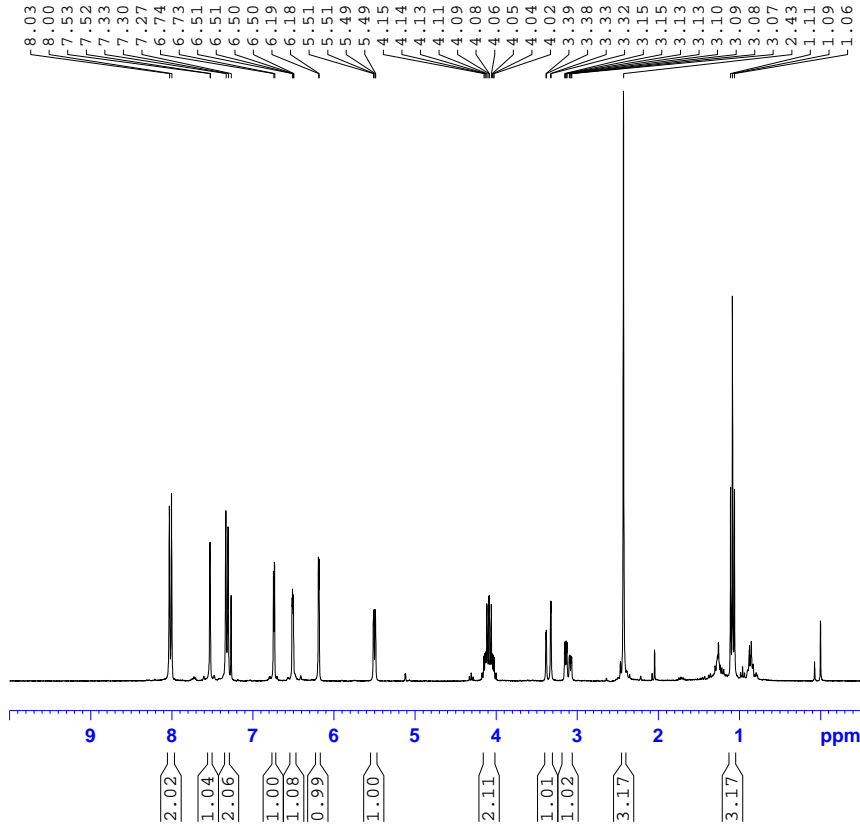

```

NAME      jwq-395c-001g1
EXPNO     10
PROCNO    1
Date_     20121206
Time      21.07
INSTRUM   spect
PROBHD    5 mm DUL 13C-1
PULPROG   zg30
TD        65536
SOLVENT   CDCl3
NS         4
DS         0
SWH       8992.806 Hz
FIDRES    0.137219 Hz
AQ        3.6438515 sec
RG         181
DW        55.600 usec
DE         8.00 usec
TE        295.3 K
D1        1.00000000 sec
TD0       1

===== CHANNEL f1 =====
NUC1      1H
P1        10.30 usec
PL1       3.00 dB
SFO1     300.1324010 MHz
SI        32768
SF        300.1300043 MHz
WDW       EM
SSB       0
LB        0.30 Hz
GB         0
PC         1.00

```

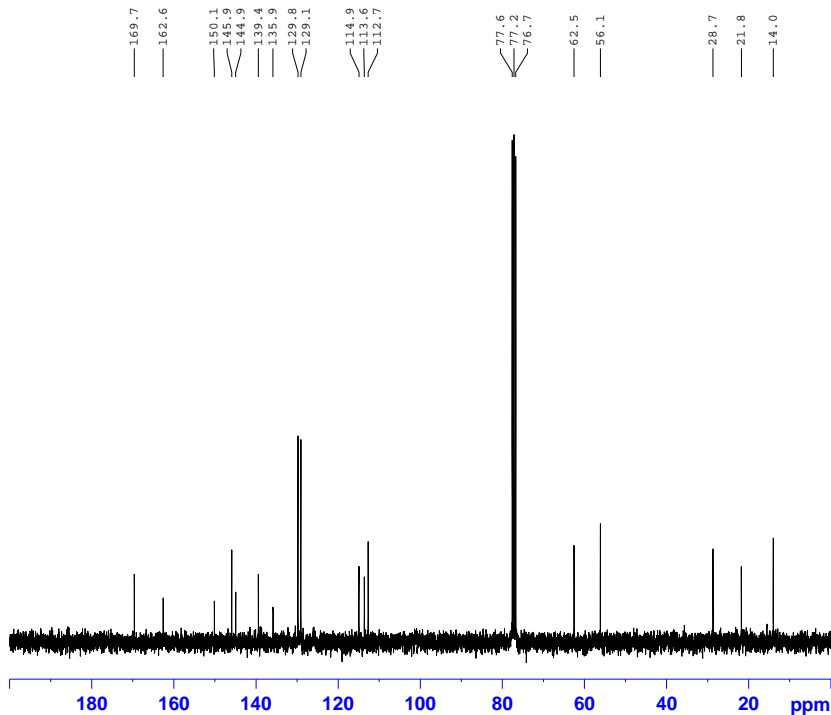

```

NAME      jwq-395c-001g1
EXPNO     1
PROCNO    1
Date_     20121206
Time      21.11
INSTRUM   spect
PROBHD    5 mm DUL 13C-1
PULPROG   zgpg30
TD        65536
SOLVENT   CDCl3
NS         67
DS         4
SWH       17985.611 Hz
FIDRES    0.274439 Hz
AQ        1.8219508 sec
RG         645.1
DW        27.800 usec
DE         6.50 usec
TE        295.7 K
D1        2.00000000 sec
D11       0.03000000 sec
TD0       1

===== CHANNEL f1 =====
NUC1      13C
P1        12.50 usec
PL1       2.00 dB
SFO1     75.4752953 MHz

===== CHANNEL f2 =====
CPDPRG2   waltz16
NUC2      1H
PCPD2     100.00 usec
PL2       3.00 dB
PL12     22.74 dB
PL13     23.00 dB
SFO2     300.1312005 MHz
SI        32768
SF        75.4677401 MHz
WDW       EM
SSB       0
LB        1.00 Hz
GB         0
PC         1.40

```



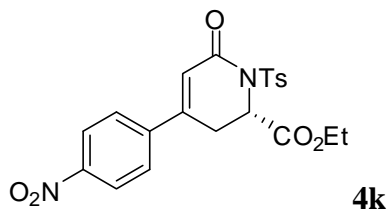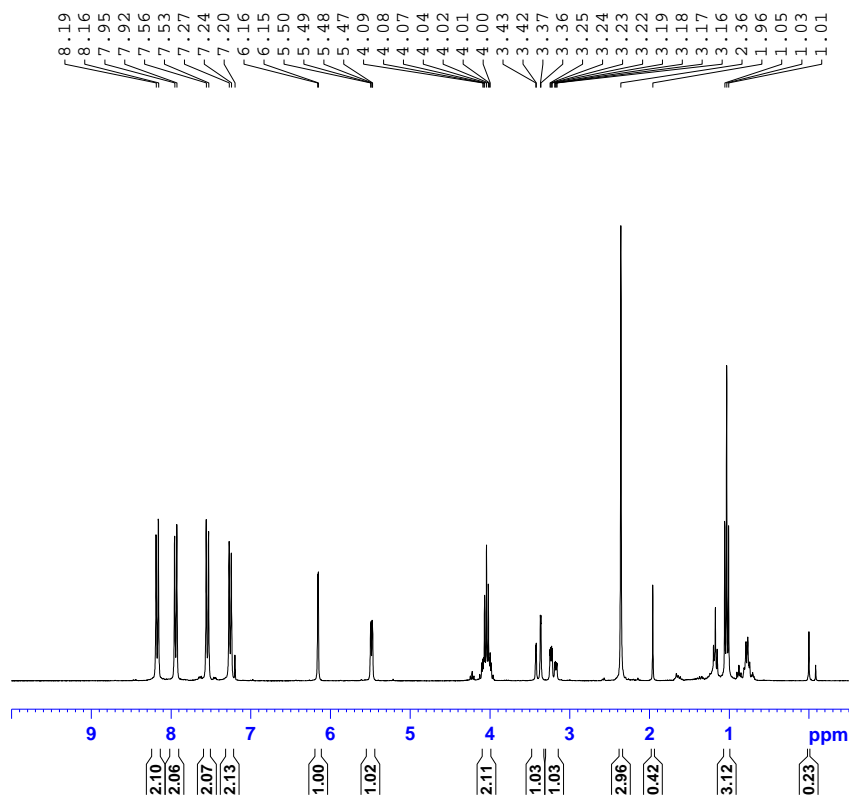

```

NAME      jwq-392a-092g1
EXPNO    10
PROCNO   1
Date_    20121203
Time     19.01
INSTRUM  spect
PROBHD   5 mm DUL 13C-1
PULPROG  zg30
TD       65536
SOLVENT  CDCl3
NS       3
DS       0
SWH      8992.806 Hz
FIDRES   0.137219 Hz
AQ       3.6438515 sec
RG       71.8
DW       55.600 usec
DE       8.00 usec
TE       296.2 K
D1       1.00000000 sec
TD0      1

===== CHANNEL f1 =====
NUC1     1H
P1       10.30 usec
PL1      3.00 dB
SFO1     300.1324010 MHz
SI       32768
SF       300.1300251 MHz
WDW      EM
SSB      0
LB       0.30 Hz
GB       0
PC       1.00

```

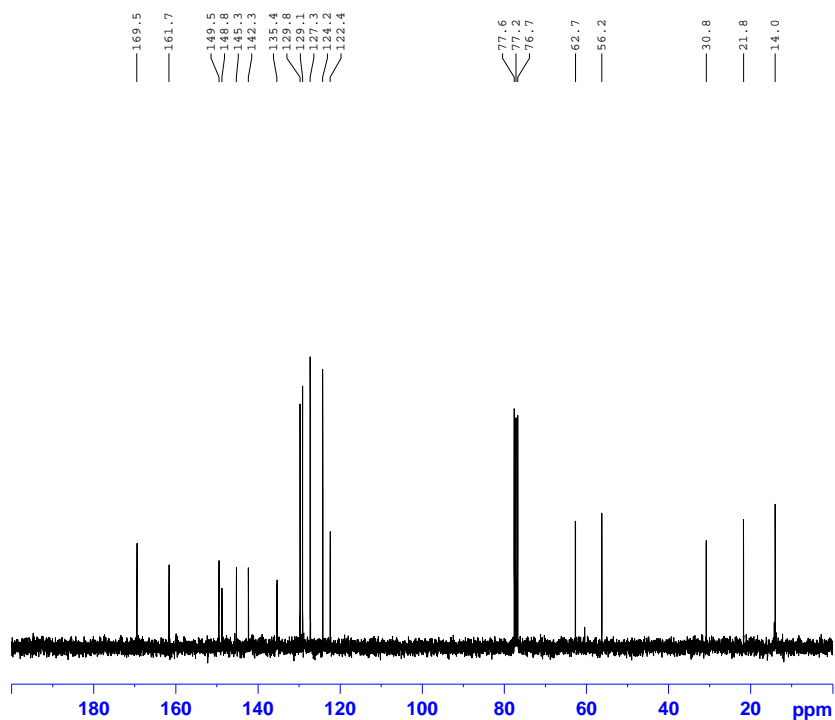

```

NAME      jwq-392a-092g1
EXPNO    1
PROCNO   1
Date_    20121203
Time     19.04
INSTRUM  spect
PROBHD   5 mm DUL 13C-1
PULPROG  zgpg30
TD       65536
SOLVENT  CDCl3
NS       28
DS       4
SWH      17985.611 Hz
FIDRES   0.274439 Hz
AQ       1.8219508 sec
RG       3251
DW       27.800 usec
DE       6.50 usec
TE       296.5 K
D1       2.00000000 sec
D11      0.03000000 sec
TD0      1

===== CHANNEL f1 =====
NUC1     13C
P1       12.50 usec
PL1      2.00 dB
SFO1     75.4752953 MHz

===== CHANNEL f2 =====
CPDPRG2  waltz16
NUC2     1H
PCPD2    100.00 usec
PL2      3.00 dB
PL12     22.74 dB
PL13     23.00 dB
SFO2     300.1312005 MHz
SI       32768
SF       75.4677450 MHz
WDW      EM
SSB      0
LB       1.00 Hz
GB       0
PC       1.40

```

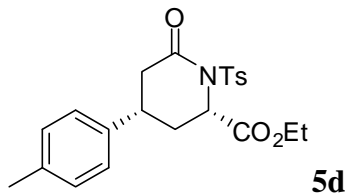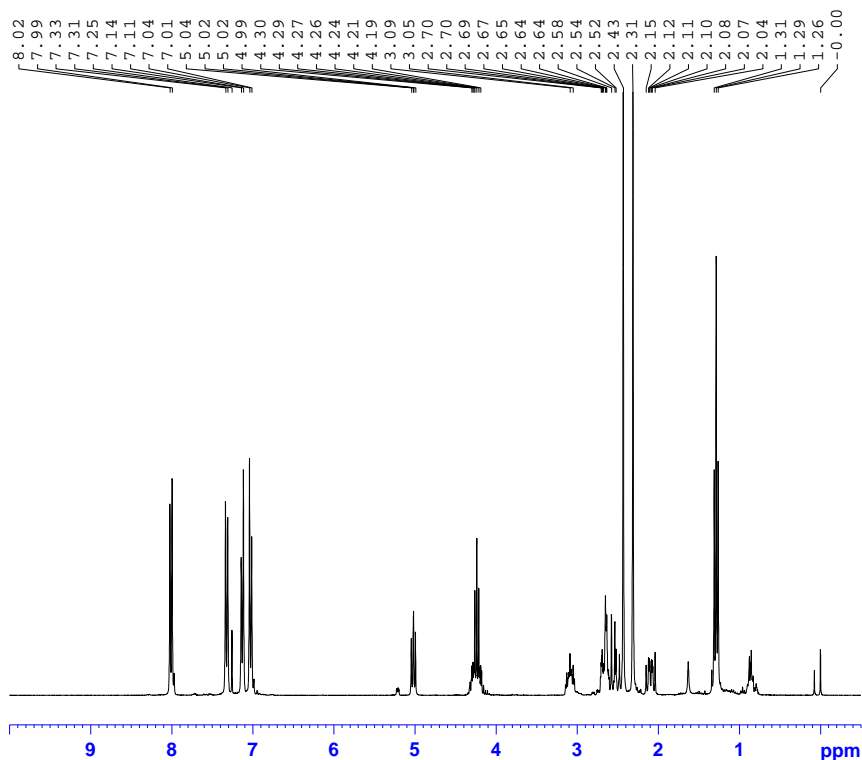

```

NAME      jwq-538b-066g1
EXPNO     10
PROCNO    1
Date_     20130724
Time      13.30
INSTRUM   spect
PROBHD    5 mm DUL 13C-1
PULPROG   zg30
TD        32768
SOLVENT   CDCl3
NS        15
DS        0
SWH       8992.806 Hz
FIDRES    0.274439 Hz
AQ        1.8219508 sec
RG        161.3
DW        55.600 usec
DE        6.50 usec
TE        299.6 K
D1        1.0000000 sec
TD0       1

```

```

===== CHANNEL f1 =====
NUC1      1H
P1        10.30 usec
PL1       3.00 dB
SFO1     300.1318534 MHz
SI        32768
SF        300.1300087 MHz
WDW       EM
SSB       0
LB        0.30 Hz
GB        0
PC        1.00

```

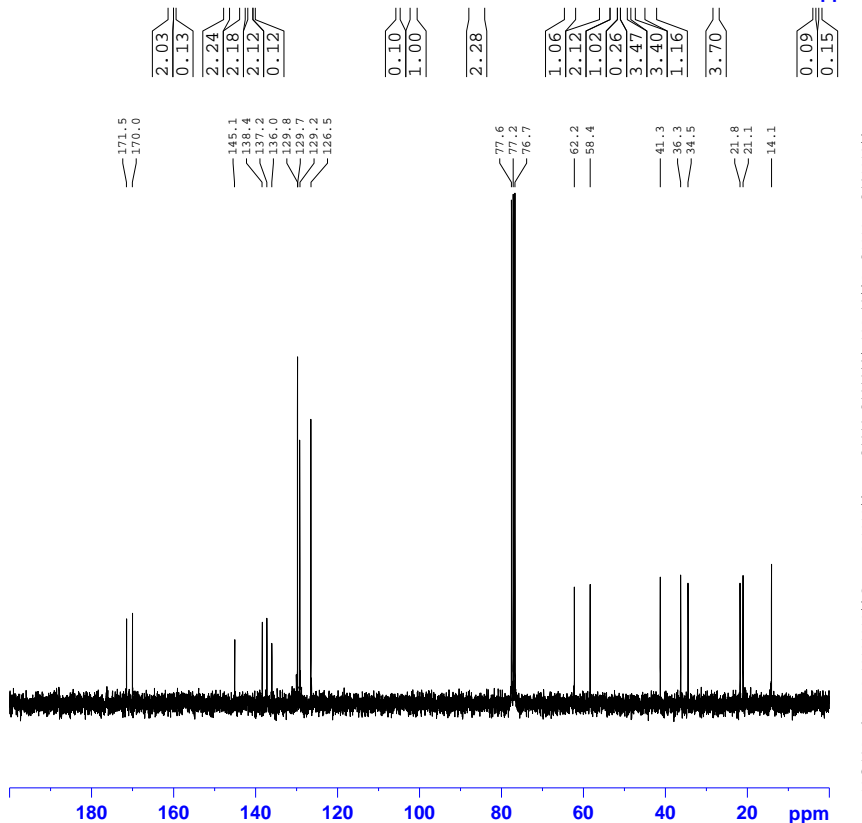

```

NAME      jwq-538b-066g1
EXPNO     11
PROCNO    1
Date_     20130724
Time      13.36
INSTRUM   spect
PROBHD    5 mm DUL 13C-1
PULPROG   zgpg30
TD        65536
SOLVENT   CDCl3
NS        82
DS        4
SWH       17985.611 Hz
FIDRES    0.274439 Hz
AQ        1.8219508 sec
RG        362
DW        27.800 usec
DE        6.50 usec
TE        300.2 K
D1        2.0000000 sec
D11       0.0300000 sec
TD0       1

```

```

===== CHANNEL f1 =====
NUC1      13C
P1        12.50 usec
PL1       2.00 dB
SFO1     75.4752953 MHz

```

```

===== CHANNEL f2 =====
CPDPRG2   waltz16
NUC2      1H
PCPD2     100.00 usec
PL2       3.00 dB
PL12      22.74 dB
PL13      23.00 dB
SFO2     300.1312005 MHz
SI        32768
SF        75.4677405 MHz
WDW       EM
SSB       0
LB        1.00 Hz
GB        0
PC        1.40

```

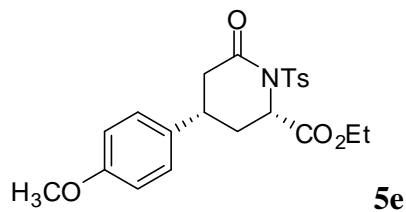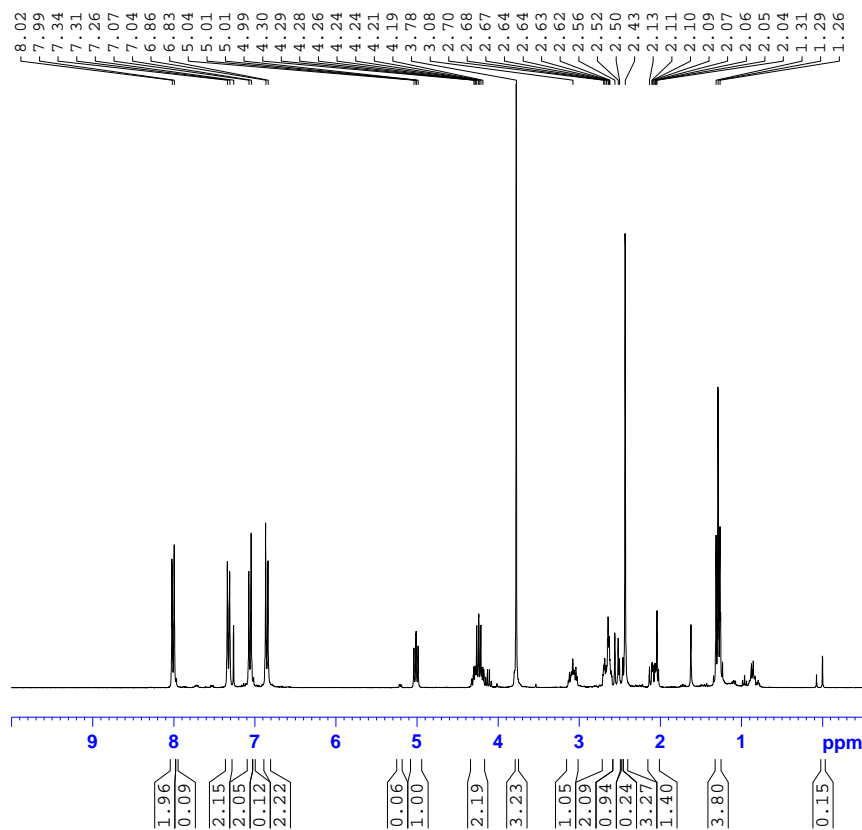

```

NAME      jwq-538c-066g1
EXPNO    14
PROCNO   1
Date_    20130724
Time     14.08
INSTRUM  spect
PROBHD   5 mm DUL 13C-1
PULPROG  zg30
TD       32768
SOLVENT  CDCl3
NS       11
DS       0
SWH      8992.806 Hz
FIDRES   0.274439 Hz
AQ       1.8219508 sec
RG       256
DW       55.600 usec
DE       6.50 usec
TE       299.9 K
D1       1.0000000 sec
TD0      1
  
```

```

===== CHANNEL f1 =====
NUC1     1H
P1       10.30 usec
PL1      3.00 dB
SFO1    300.1318534 MHz
SI       32768
SF       300.1300072 MHz
WDW      EM
SSB      0
LB       0.30 Hz
GB       0
PC       1.00
  
```

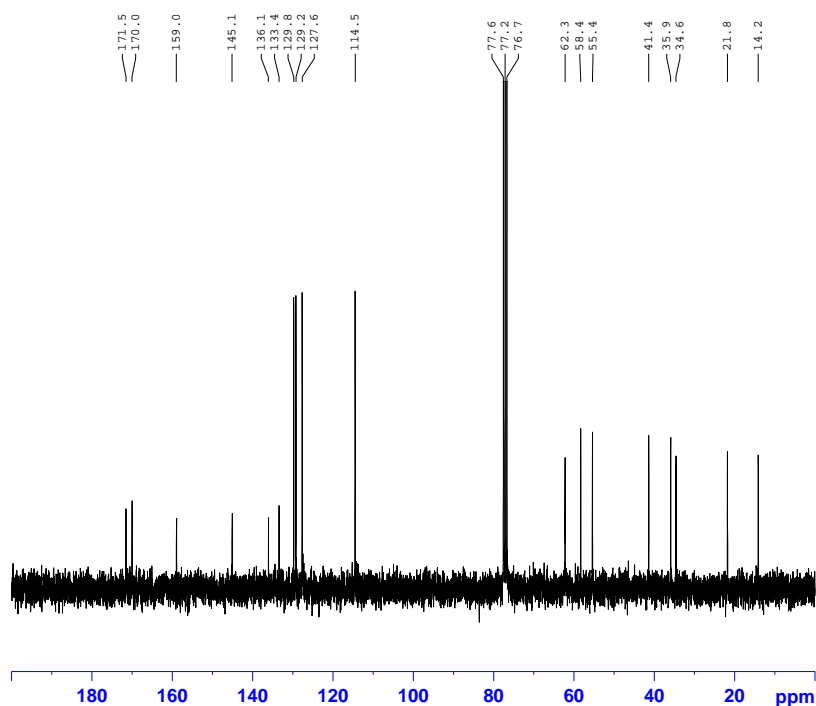

```

NAME      jwq-538c-066g1
EXPNO    11
PROCNO   1
Date_    20130724
Time     13.43
INSTRUM  spect
PROBHD   5 mm DUL 13C-1
PULPROG  zgpg30
TD       65536
SOLVENT  CDCl3
NS       196
DS       4
SWH      17985.611 Hz
FIDRES   0.274439 Hz
AQ       1.8219508 sec
RG       812.7
DW       27.800 usec
DE       6.50 usec
TE       300.0 K
D1       2.0000000 sec
D11      0.0300000 sec
TD0      1
  
```

```

===== CHANNEL f1 =====
NUC1     13C
P1       12.50 usec
PL1      2.00 dB
SFO1    75.4752953 MHz
  
```

```

===== CHANNEL f2 =====
CPDPRG2  waltz16
NUC2     1H
PCPD2    100.00 usec
PL2      3.00 dB
PL12     22.74 dB
PL13     23.00 dB
SFO2    300.1312005 MHz
SI       32768
SF       75.4677397 MHz
WDW      EM
SSB      0
LB       1.00 Hz
GB       0
PC       1.40
  
```

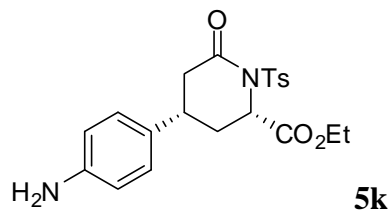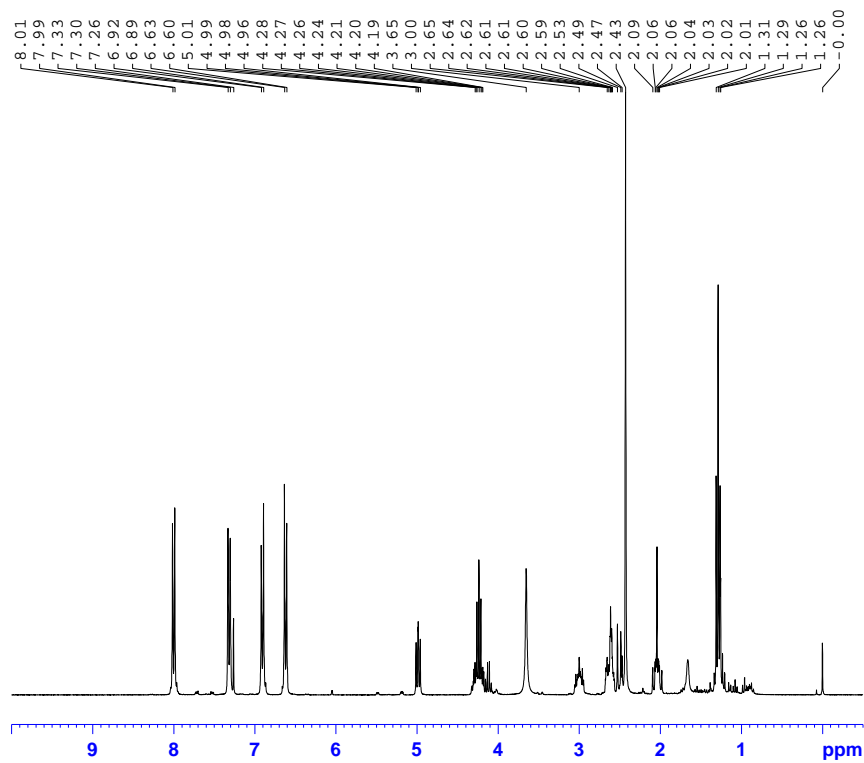

```

NAME      jwq-531b-059g1
EXPNO     10
PROCNO    1
Date_     20130718
Time      16.05
INSTRUM   spect
PROBHD    5 mm DUL 13C-1
PULPROG   zg30
TD         32768
SOLVENT   CDCl3
NS         11
DS         0
SWH        8992.806 Hz
FIDRES     0.274439 Hz
AQ         1.8219508 sec
RG         128
DW         55.600 usec
DE         6.50 usec
TE         300.4 K
D1         1.00000000 sec
TD0        1

===== CHANNEL f1 =====
NUC1      1H
P1         10.30 usec
PL1        3.00 dB
SFO1      300.1318534 MHz
SI         32768
SF         300.1300071 MHz
WDW        EM
SSB        0
LB         0.30 Hz
GB         0
PC         1.00

```

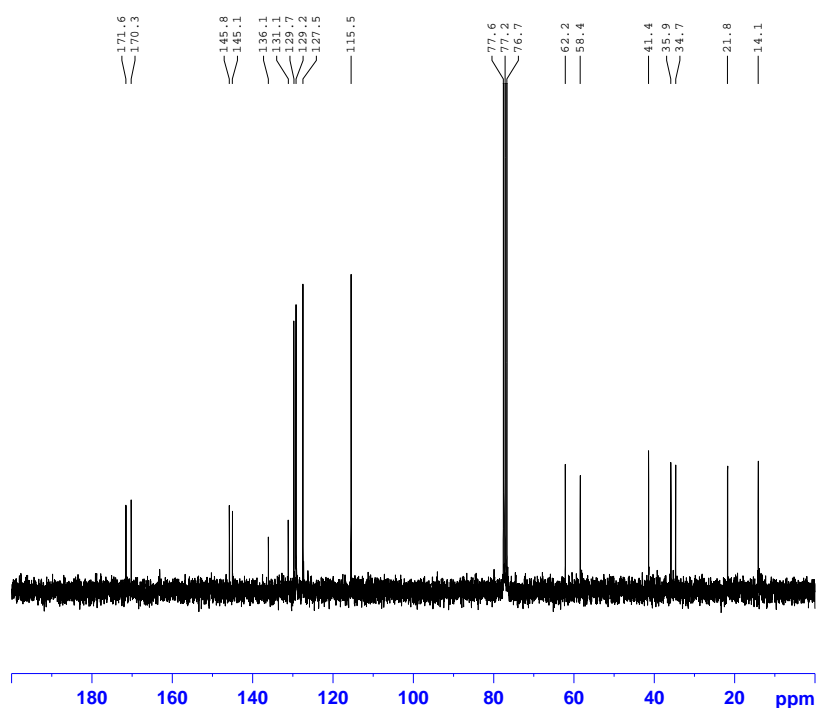

```

NAME      jwq-531b-059g1
EXPNO     11
PROCNO    1
Date_     20130718
Time      16.13
INSTRUM   spect
PROBHD    5 mm DUL 13C-1
PULPROG   zgpg30
TD         65536
SOLVENT   CDCl3
NS         114
DS         4
SWH        17985.611 Hz
FIDRES     0.274439 Hz
AQ         1.8219508 sec
RG         574.7
DW         27.800 usec
DE         6.50 usec
TE         301.3 K
D1         2.00000000 sec
D11        0.03000000 sec
TD0        1

===== CHANNEL f1 =====
NUC1      13C
P1         12.50 usec
PL1        2.00 dB
SFO1      75.4752953 MHz

===== CHANNEL f2 =====
CPDPRG2   waltz16
NUC2      1H
PCPD2     100.00 usec
PL2        3.00 dB
PL12       22.74 dB
PL13       23.00 dB
SFO2      300.1312005 MHz
SI         32768
SF         75.4677403 MHz
WDW        EM
SSB        0
LB         1.00 Hz
GB         0
PC         1.40

```

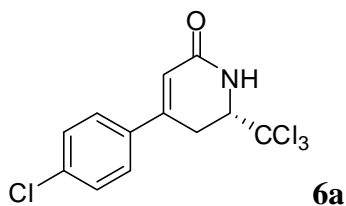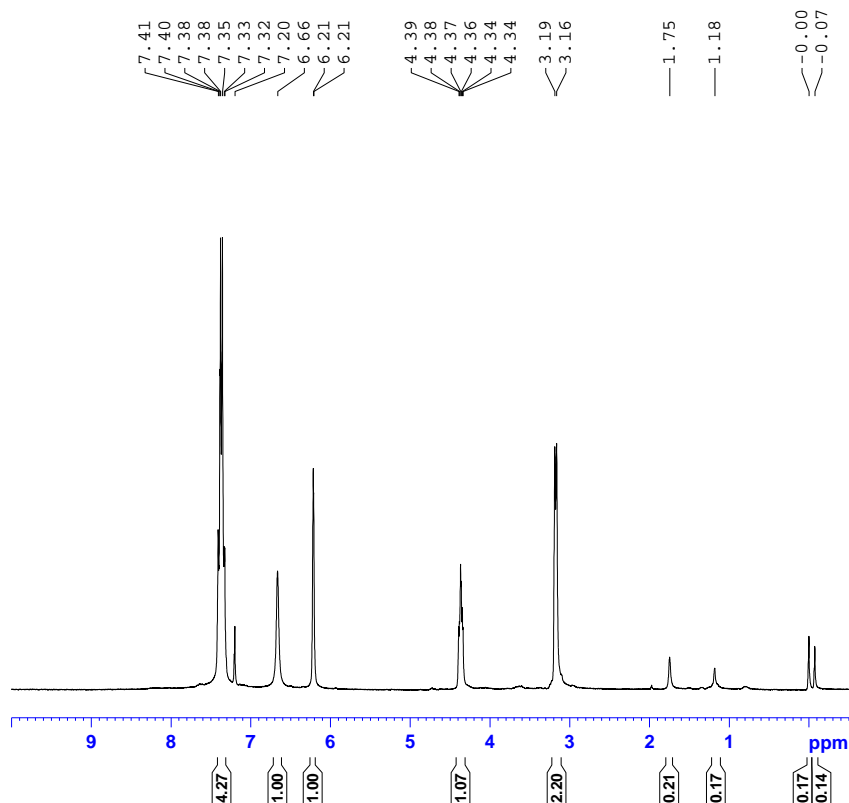

```

NAME      jwq-459c-076rg2
EXPNO     40
PROCNO    1
Date_     20130403
Time      19.39
INSTRUM   spect
PROBHD    5 mm DUL 13C-1
PULPROG   zg30
TD        32768
SOLVENT   CDCl3
NS        7
DS        0
SWH       6172.839 Hz
FIDRES    0.188880 Hz
AQ        2.6542580 sec
RG        181
DW        81.000 usec
DE        6.50 usec
TE        295.8 K
D1        1.00000000 sec
TD0       1

===== CHANNEL f1 =====
NUC1      1H
P1        10.30 usec
PL1       3.00 dB
SFO1     300.1318534 MHz
SI        32768
SF        300.1300259 MHz
WDW       EM
SSB       0
LB        0.30 Hz
GB        0
PC        1.00
  
```

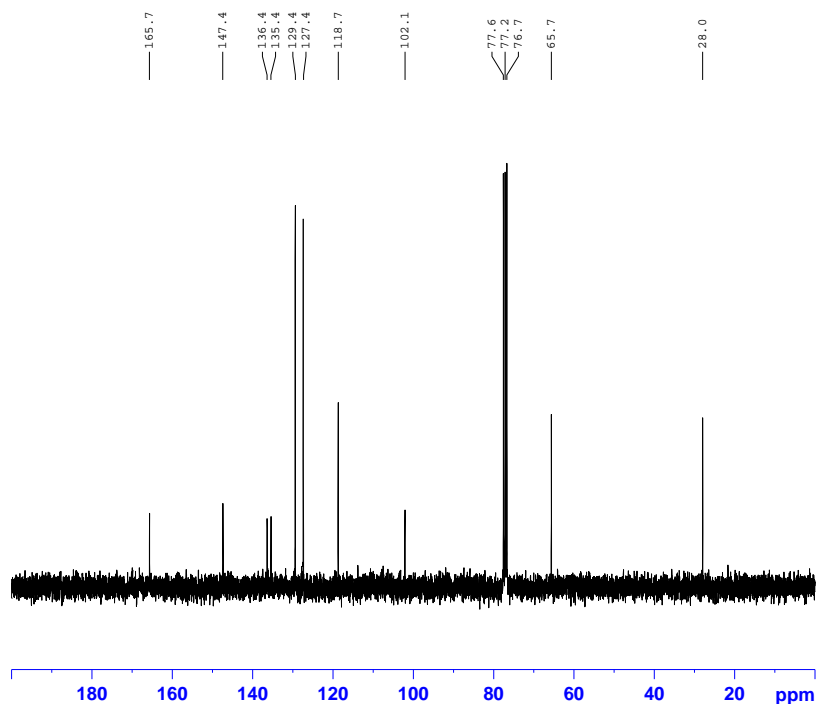

```

NAME      jwq-459c-076rg2
EXPNO     22
PROCNO    1
Date_     20130402
Time      11.43
INSTRUM   spect
PROBHD    5 mm DUL 13C-1
PULPROG   zgpg30
TD        65536
SOLVENT   CDCl3
NS        101
DS        4
SWH       17985.611 Hz
FIDRES    0.274439 Hz
AQ        1.8219508 sec
RG        512
DW        27.800 usec
DE        6.50 usec
TE        296.2 K
D1        2.00000000 sec
D11       0.03000000 sec
TD0       1

===== CHANNEL f1 =====
NUC1      13C
P1        12.50 usec
PL1       2.00 dB
SFO1     75.4752953 MHz

===== CHANNEL f2 =====
CPDPRG2   waltz16
NUC2      1H
PCPD2     100.00 usec
PL2       3.00 dB
PL12     22.74 dB
PL13     23.00 dB
SFO2     300.1312005 MHz
SI        32768
SF        75.4677405 MHz
WDW       EM
SSB       0
LB        1.00 Hz
GB        0
PC        1.40
  
```

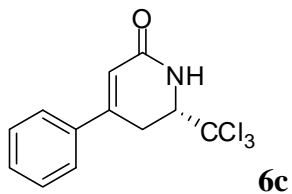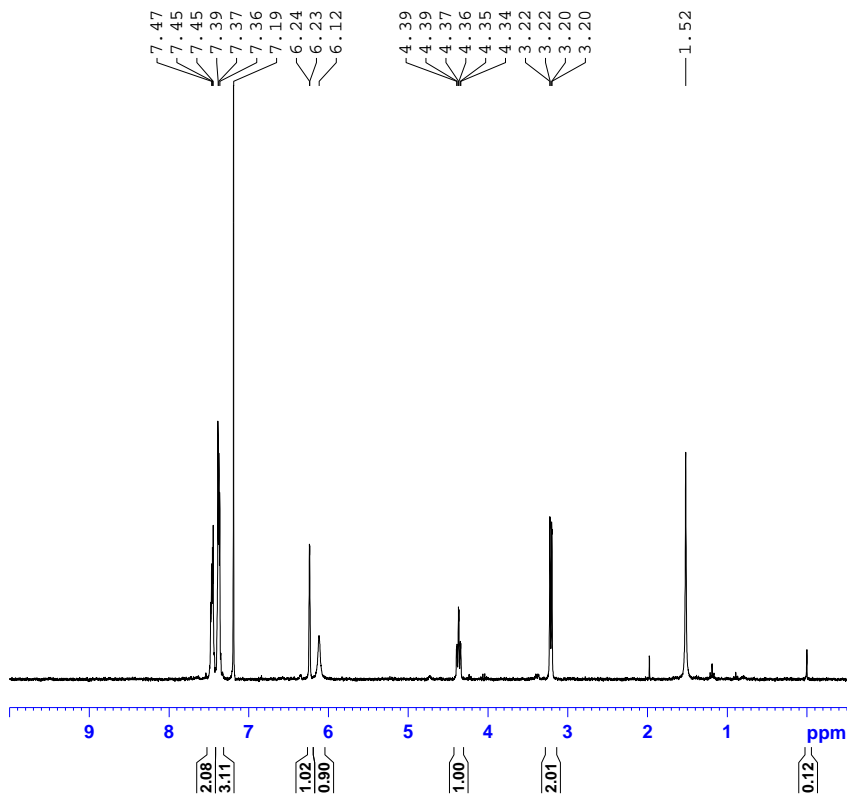

```

NAME      jwq-484a-004g1
EXPNO     10
PROCNO    1
Date_     20130507
Time      7.22
INSTRUM   spect
PROBHD    5 mm DUL 13C-1
PULPROG   zg30
TD         32768
SOLVENT   CDCl3
NS         6
DS         0
SWH       8992.806 Hz
FIDRES    0.274439 Hz
AQ         1.8219508 sec
RG         574.7
DW         55.600 usec
DE         6.50 usec
TE         298.2 K
D1         1.00000000 sec
TD0        1
  
```

```

===== CHANNEL f1 =====
NUC1      1H
P1         10.30 usec
PL1        3.00 dB
SFO1      300.1318534 MHz
SI         32768
SF         300.1300278 MHz
WDW        EM
SSB         0
LB         0.30 Hz
GB         0
PC         1.00
  
```

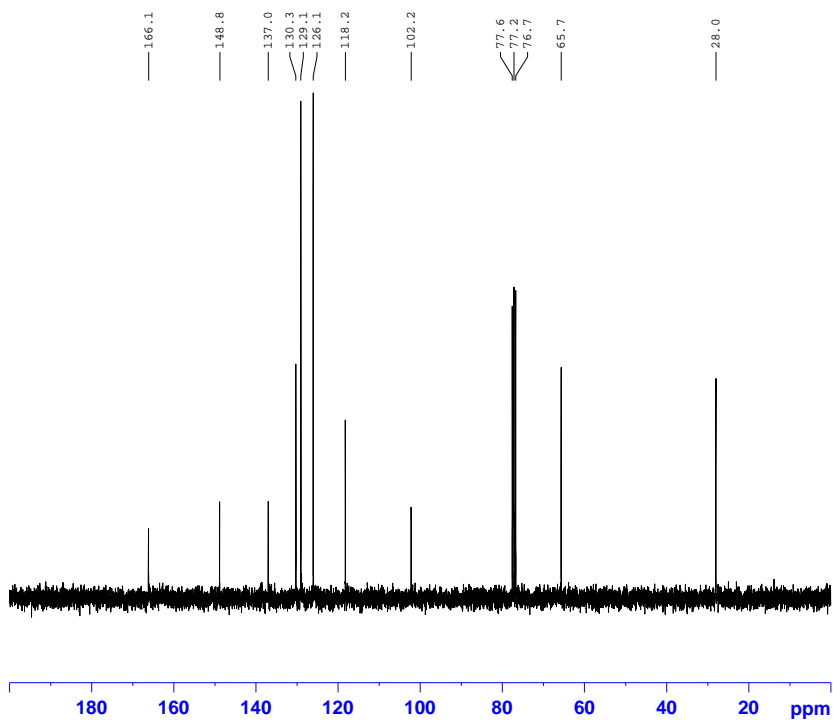

```

NAME      jwq-484b-005g1
EXPNO     11
PROCNO    1
Date_     20130506
Time      12.38
INSTRUM   spect
PROBHD    5 mm DUL 13C-1
PULPROG   zgpg30
TD         65536
SOLVENT   CDCl3
NS         34
DS         4
SWH       17985.611 Hz
FIDRES    0.274439 Hz
AQ         1.8219508 sec
RG         812.7
DW         27.800 usec
DE         6.50 usec
TE         299.1 K
D1         2.00000000 sec
D11        0.03000000 sec
TD0        1
  
```

```

===== CHANNEL f1 =====
NUC1      13C
P1         12.50 usec
PL1        2.00 dB
SFO1      75.4752953 MHz
  
```

```

===== CHANNEL f2 =====
CPDPRG2   waltz16
NUC2      1H
PCPD2     100.00 usec
PL2        3.00 dB
PL12       22.74 dB
PL13       23.00 dB
SFO2      300.1312005 MHz
SI         32768
SF         75.4677431 MHz
WDW        EM
SSB         0
LB         1.00 Hz
GB         0
PC         1.40
  
```

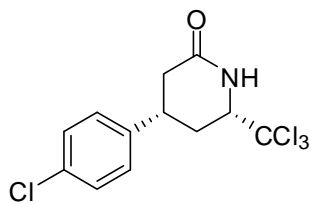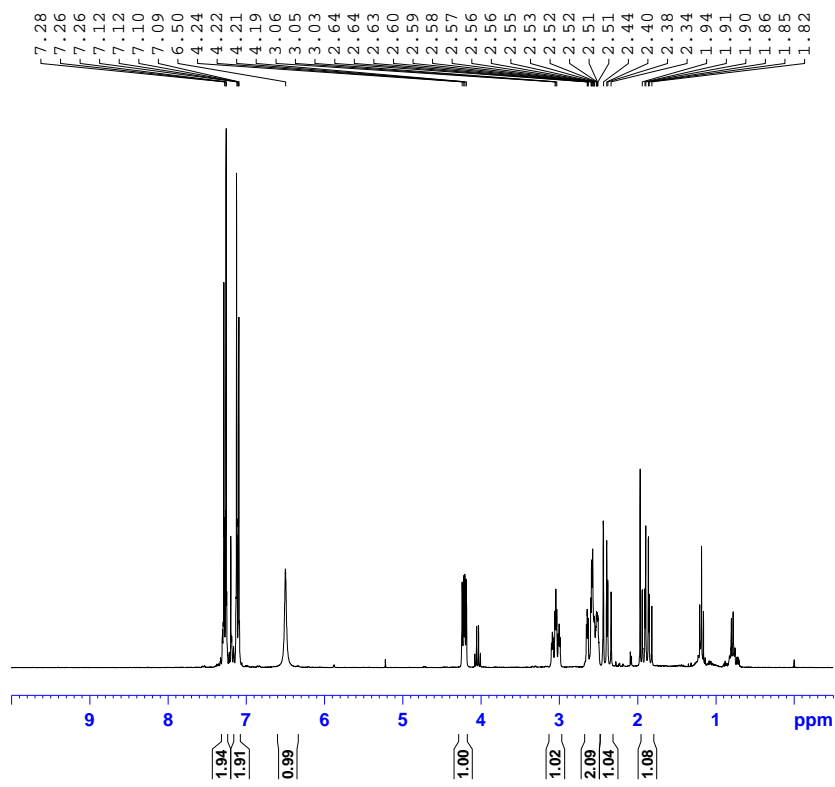

```

NAME      jwq-496a-031rg1
EXPNO     10
PROCNO    1
Date_     20130522
Time      18.28
INSTRUM   spect
PROBHD    5 mm DUL 13C-1
PULPROG   zg30
TD        32768
SOLVENT   CDCl3
NS         6
DS         0
SWH       8992.806 Hz
FIDRES    0.274439 Hz
AQ        1.8219508 sec
RG         128
DW        55.600 usec
DE        6.50 usec
TE        299.9 K
D1        1.00000000 sec
D11       1
TDO       1

===== CHANNEL f1 =====
NUC1      1H
P1        10.30 usec
PL1       3.00 dB
SF01     300.1318534 MHz
SI        32768
SF        300.1300263 MHz
WDW       EM
SSB       0
LB        0.30 Hz
GB        0
PC        1.00

```

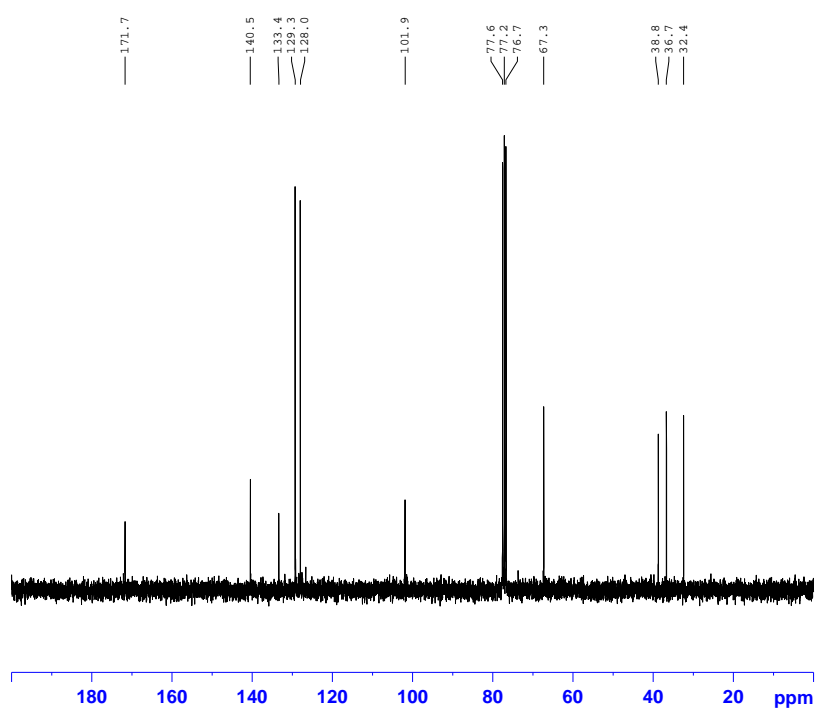

```

NAME      jwq-496a-031rg1
EXPNO     11
PROCNO    1
Date_     20130522
Time      18.32
INSTRUM   spect
PROBHD    5 mm DUL 13C-1
PULPROG   zgpg30
TD        65536
SOLVENT   CDCl3
NS         47
DS         4
SWH       17985.611 Hz
FIDRES    0.274439 Hz
AQ        1.8219508 sec
RG         645.1
DW        27.800 usec
DE        6.50 usec
TE        300.3 K
D1        2.00000000 sec
D11       0.03000000 sec
TDO       1

===== CHANNEL f1 =====
NUC1      13C
P1        12.50 usec
PL1       2.00 dB
SF01     75.4752953 MHz

===== CHANNEL f2 =====
CPDPRG2   waltz16
NUC2      1H
PCPD2     100.00 usec
PL2       3.00 dB
PL12     22.74 dB
PL13     23.00 dB
SF02     300.1312005 MHz
SI        32768
SF        75.4677407 MHz
WDW       EM
SSB       0
LB        1.00 Hz
GB        0
PC        1.40

```

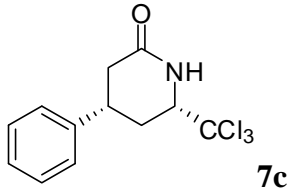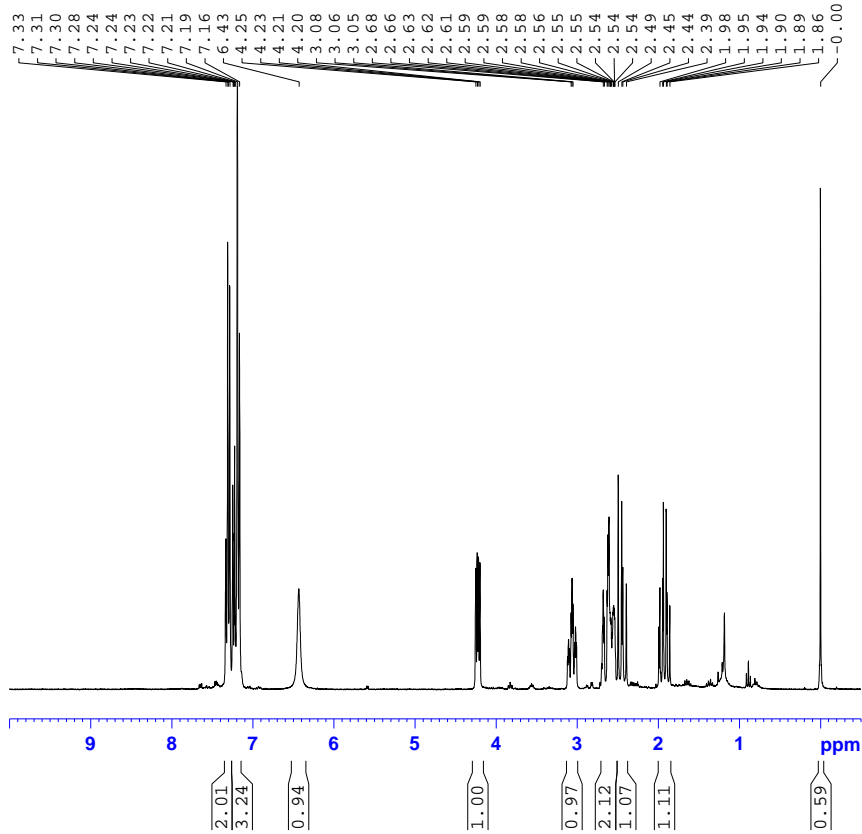

```

NAME      jwq-491c-014w1
EXPNO     10
PROCNO    1
Date_     20130513
Time      14.56
INSTRUM   spect
PROBHD    5 mm DUL 13C-1
PULPROG   zg30
TD         32768
SOLVENT   CDCl3
NS         7
DS         0
SWH        8992.806 Hz
FIDRES     0.274439 Hz
AQ         1.8219508 sec
RG         228.1
DW         55.600 usec
DE         6.50 usec
TE         298.7 K
D1         1.0000000 sec
TD0        1
  
```

```

===== CHANNEL f1 =====
NUC1      1H
P1        10.30 usec
PL1       3.00 dB
SFO1     300.1318534 MHz
SI        32768
SF        300.1300285 MHz
WDW       EM
SSB       0
LB        0.30 Hz
GB        0
PC        1.00
  
```

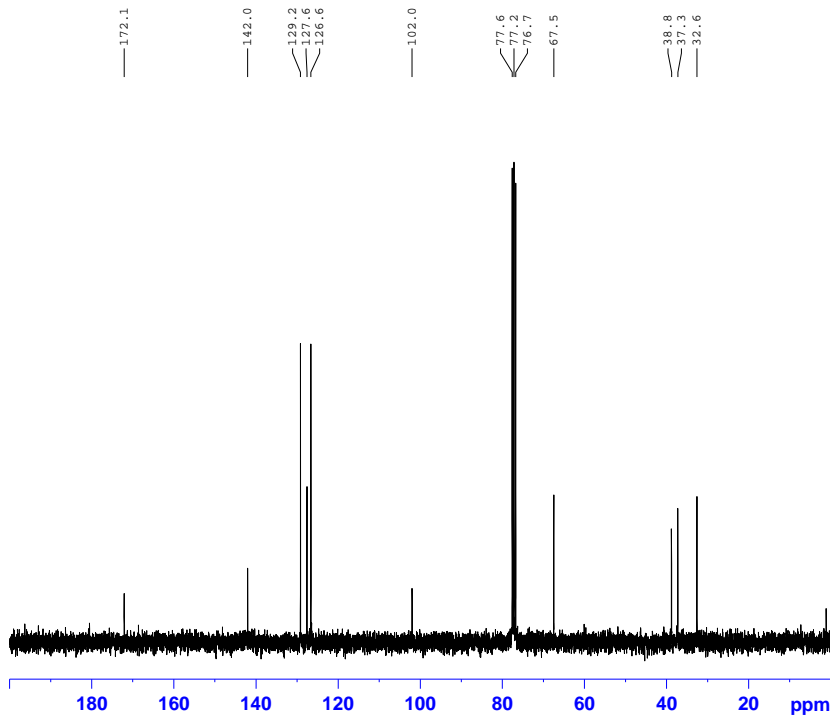

```

NAME      jwq-491c-014w1
EXPNO     11
PROCNO    1
Date_     20130513
Time      14.58
INSTRUM   spect
PROBHD    5 mm DUL 13C-1
PULPROG   zgpg30
TD         65536
SOLVENT   CDCl3
NS         76
DS         4
SWH        17985.611 Hz
FIDRES     0.274439 Hz
AQ         1.8219508 sec
RG         256
DW         27.800 usec
DE         6.50 usec
TE         299.0 K
D1         2.0000000 sec
D11        0.0300000 sec
TD0        1
  
```

```

===== CHANNEL f1 =====
NUC1      13C
P1        12.50 usec
PL1       2.00 dB
SFO1     75.4752953 MHz
  
```

```

===== CHANNEL f2 =====
CPDPRG2   waltz16
NUC2      1H
PCPD2     100.00 usec
PL2       3.00 dB
PL12      22.74 dB
PL13      23.00 dB
SFO2     300.1312005 MHz
SI        32768
SF        75.4677400 MHz
WDW       EM
SSB       0
LB        1.00 Hz
GB        0
PC        1.40
  
```



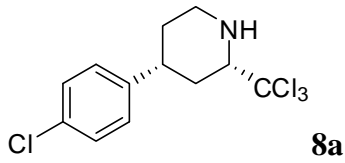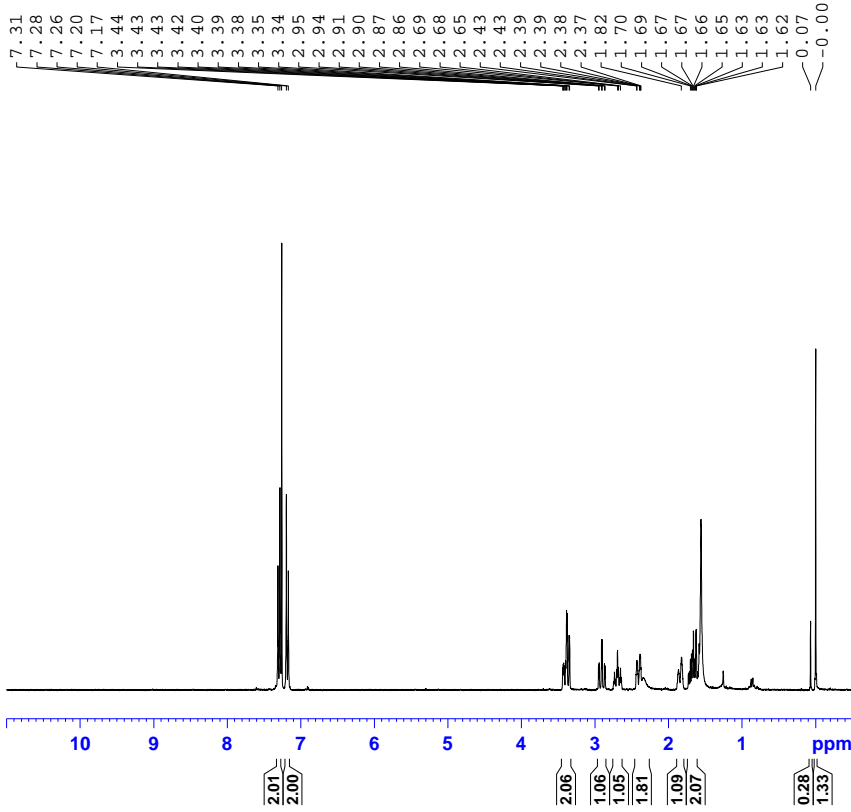

```

NAME      jwq-505b-045g1
EXPNO    10
PROCNO   1
Date_    20130605
Time     18.09
INSTRUM  spect
PROBHD   5 mm DUL 13C-1
PULPROG  zg30
TD       32768
SOLVENT  CDCl3
NS       12
DS       0
SWH      8992.806 Hz
FIDRES   0.274439 Hz
AQ       1.8219508 sec
RG       456.1
DW       55.600 usec
DE       6.50 usec
TE       299.3 K
D1       1.00000000 sec
TD0      1

===== CHANNEL f1 =====
NUC1     1H
P1       10.30 usec
PL1      3.00 dB
SFO1     300.1318534 MHz
SI       32768
SF       300.1300069 MHz
WDW      EM
SSB      0
LB       0.30 Hz
GB       0
PC       1.00
  
```

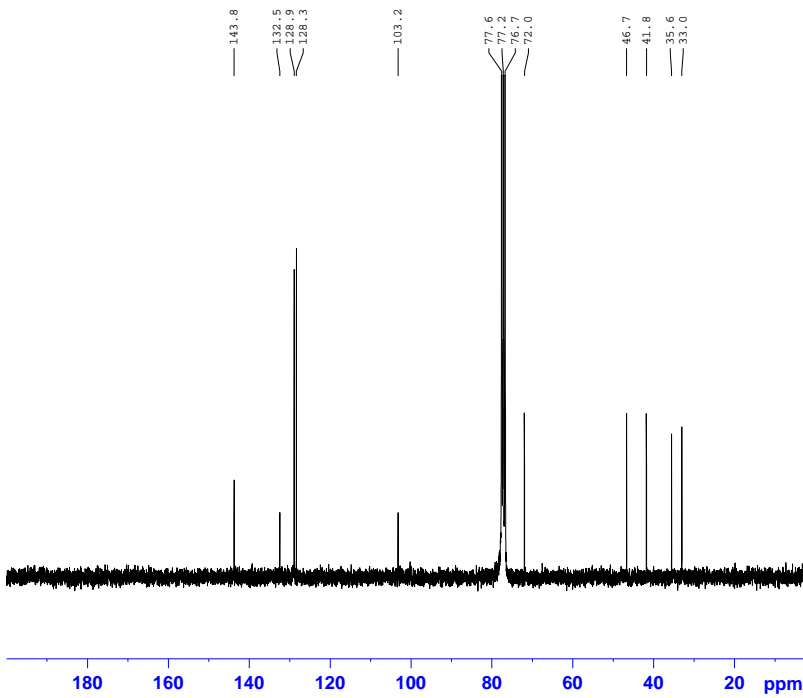

```

NAME      jwq-505b-045g1
EXPNO    40
PROCNO   1
Date_    20130605
Time     23.32
INSTRUM  spect
PROBHD   5 mm DUL 13C-1
PULPROG  zgpg30
TD       65536
SOLVENT  CDCl3
NS       7822
DS       4
SWH      17985.611 Hz
FIDRES   0.274439 Hz
AQ       1.8219508 sec
RG       645.1
DW       27.800 usec
DE       6.50 usec
TE       299.9 K
D1       2.00000000 sec
D11      0.03000000 sec
TD0      1

===== CHANNEL f1 =====
NUC1     13C
P1       12.50 usec
PL1      2.00 dB
SFO1     75.4752953 MHz

===== CHANNEL f2 =====
CPDPRG2  waltz16
NUC2     1H
PCPD2    100.00 usec
PL2      3.00 dB
PL12     22.74 dB
PL13     23.00 dB
SFO2     300.1312005 MHz
SI       32768
SF       75.4677364 MHz
WDW      EM
SSB      0
LB       1.00 Hz
GB       0
PC       1.40
  
```

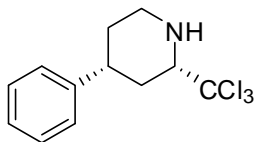

8c

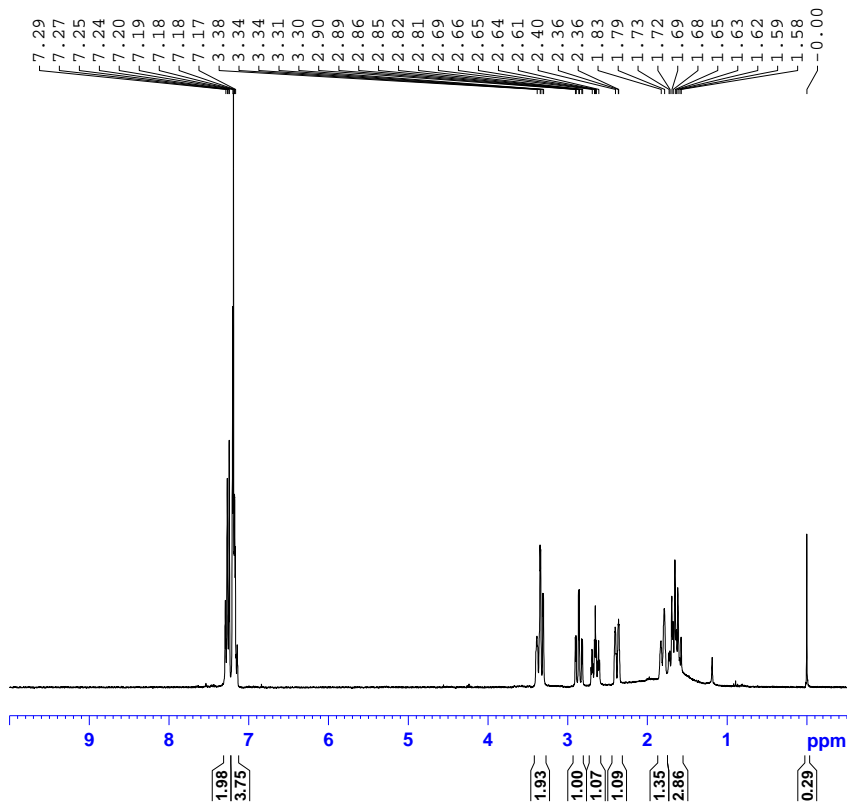

```

NAME      jwq-502b-029g1
EXPNO     10
PROCNO    1
Date_     20130521
Time      12.10
INSTRUM   spect
PROBHD    5 mm DUL 13C-1
PULPROG   zg30
TD        32768
SOLVENT   CDCl3
NS        12
DS        0
SWH       8992.806 Hz
FIDRES    0.274439 Hz
AQ        1.8219508 sec
RG        456.1
DW        55.600 usec
DE        6.50 usec
TE        299.1 K
D1        1.00000000 sec
TD0       1

===== CHANNEL f1 =====
NUC1      1H
P1        10.30 usec
PL1       3.00 dB
SFO1     300.1318534 MHz
SI        32768
SF        300.1300282 MHz
WDW       EM
SSB       0
LB        0.30 Hz
GB        0
PC        1.00

```

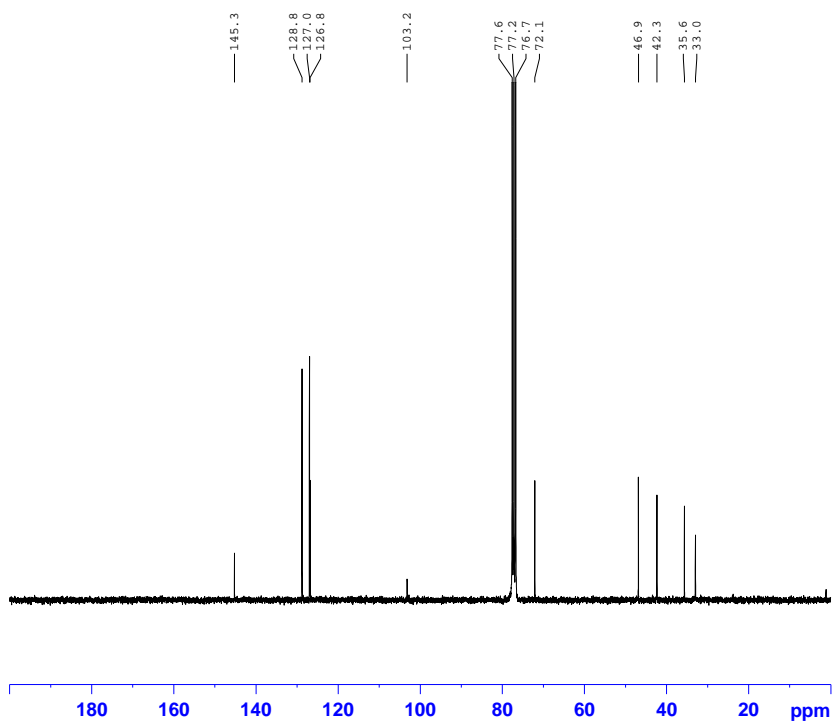

```

NAME      jwq-502b-029g1
EXPNO     20
PROCNO    1
Date_     20130523
Time      7.22
INSTRUM   spect
PROBHD    5 mm DUL 13C-1
PULPROG   zgpg30
TD        65536
SOLVENT   CDCl3
NS        7556
DS        4
SWH       17985.611 Hz
FIDRES    0.274439 Hz
AQ        1.8219508 sec
RG        812.7
DW        27.800 usec
DE        6.50 usec
TE        301.1 K
D1        2.00000000 sec
D11       0.03000000 sec
TD0       1

===== CHANNEL f1 =====
NUC1      13C
P1        12.50 usec
PL1       2.00 dB
SFO1     75.4752953 MHz

===== CHANNEL f2 =====
CPDPRG2   waltz16
NUC2      1H
PCPD2     100.00 usec
PL2       3.00 dB
PL12     22.74 dB
PL13     23.00 dB
SFO2     300.1312005 MHz
SI        32768
SF        75.4677365 MHz
WDW       EM
SSB       0
LB        1.00 Hz
GB        0
PC        1.40

```

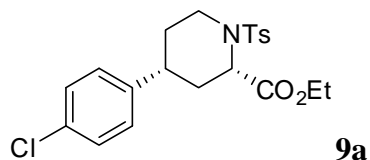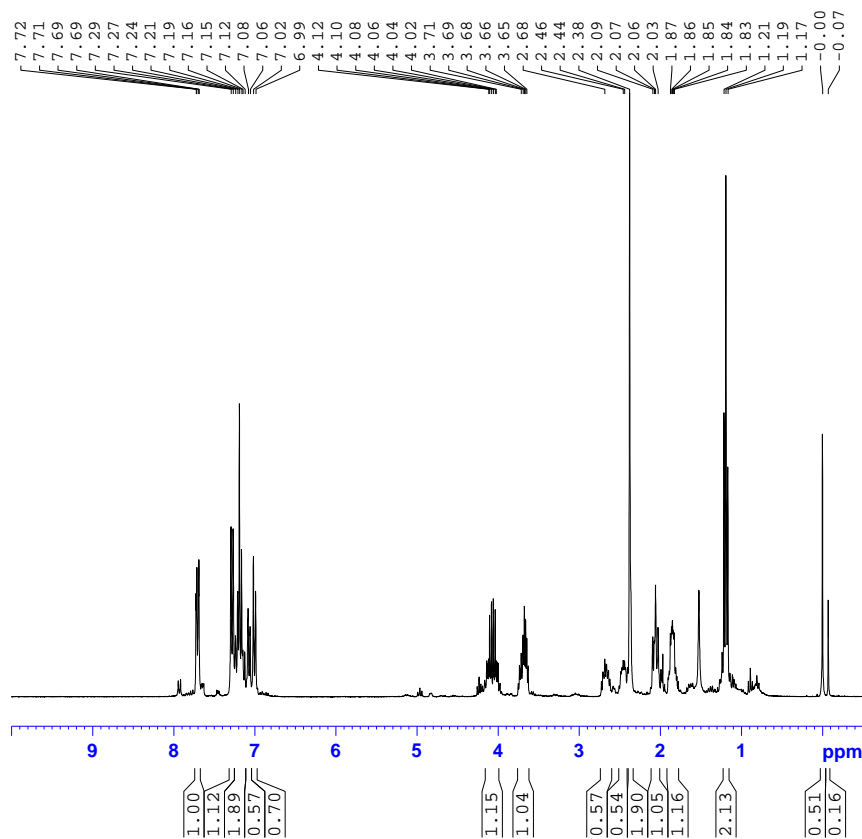

```

NAME      jwq-547b-074g1
EXPNO    10
PROCNO   1
Date_    20130730
Time     17.04
INSTRUM  spect
PROBHD   5 mm DUL 13C-1
PULPROG  zg30
TD        32768
SOLVENT  CDCl3
NS        16
DS        0
SWH       8992.806 Hz
FIDRES    0.274439 Hz
AQ        1.8219508 sec
RG         256
DW         55.600 usec
DE         6.50 usec
TE         301.3 K
D1         1.00000000 sec
TD0        1

===== CHANNEL f1 =====
NUC1      1H
P1        10.30 usec
PL1       3.00 dB
SFO1      300.1318534 MHz
SI        32768
SF        300.1300288 MHz
WDW       EM
SSB       0
LB        0.30 Hz
GB        0
PC        1.00
  
```

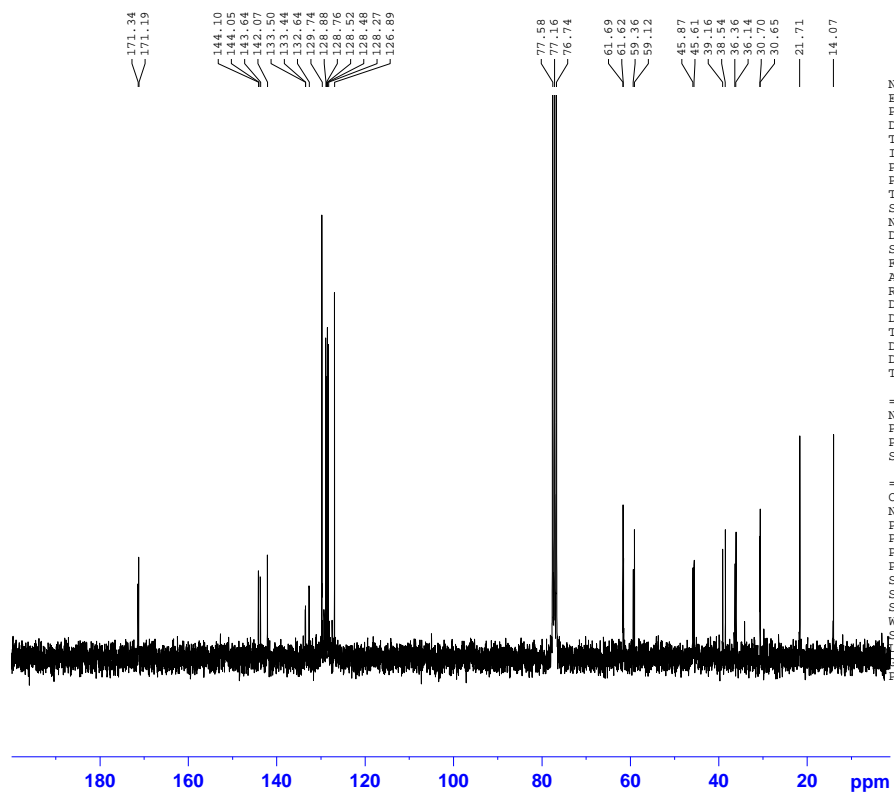

```

NAME      jwq-547b-074g1
EXPNO    20
PROCNO   1
Date_    20130801
Time     12.17
INSTRUM  spect
PROBHD   5 mm DUL 13C-1
PULPROG  zgpg30
TD        65536
SOLVENT  CDCl3
NS        688
DS        4
SWH       17985.611 Hz
FIDRES    0.274439 Hz
AQ        1.8219508 sec
RG         256
DW         27.800 usec
DE         6.50 usec
TE         299.9 K
D1         2.00000000 sec
D11       0.03000000 sec
TD0        1

===== CHANNEL f1 =====
NUC1      13C
P1        12.50 usec
PL1       2.00 dB
SFO1      75.4752953 MHz

===== CHANNEL f2 =====
CPDPRG2  waltz16
NUC2      1H
PCPD2    100.00 usec
PL2       3.00 dB
PL12     22.74 dB
PL13     23.00 dB
SFO2     300.1312005 MHz
SI        32768
SF        75.4677380 MHz
WDW       EM
SSB       0
LB        1.00 Hz
GB        0
PC        1.40
  
```

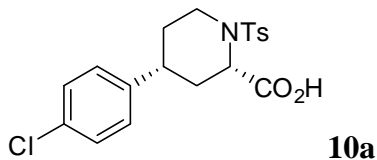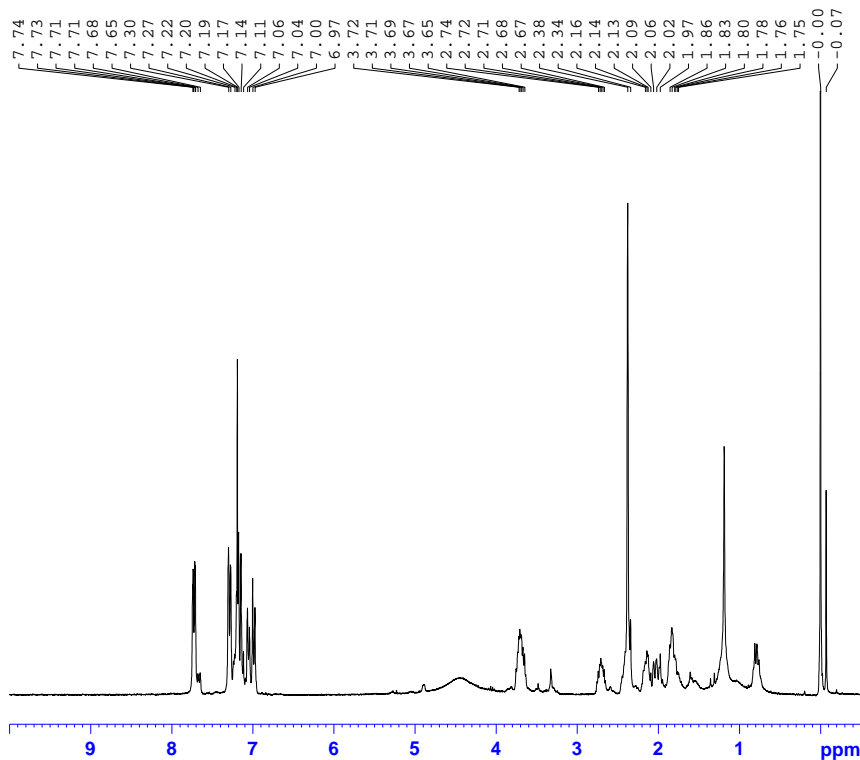

```

NAME      jwq-549a-075cg1
EXPNO    10
PROCNO   1
Date_    20130803
Time     12.10
INSTRUM  spect
PROBHD   5 mm DUL 13C-1
PULPROG  zg30
TD       32768
SOLVENT  CDCl3
NS       16
DS       0
SWH      8992.806 Hz
FIDRES   0.274439 Hz
AQ       1.8219508 sec
RG       456.1
DW       55.600 usec
DE       6.50 usec
TE       300.7 K
D1       1.00000000 sec
TDO      1
===== CHANNEL f1 =====
NUC1     1H
P1       10.30 usec
PL1     3.00 dB
SFO1    300.1318534 MHz
SI       32768
SF       300.1300287 MHz
WDW      EM
SSB      0
LB       0.30 Hz
GB       0
PC       1.00
  
```

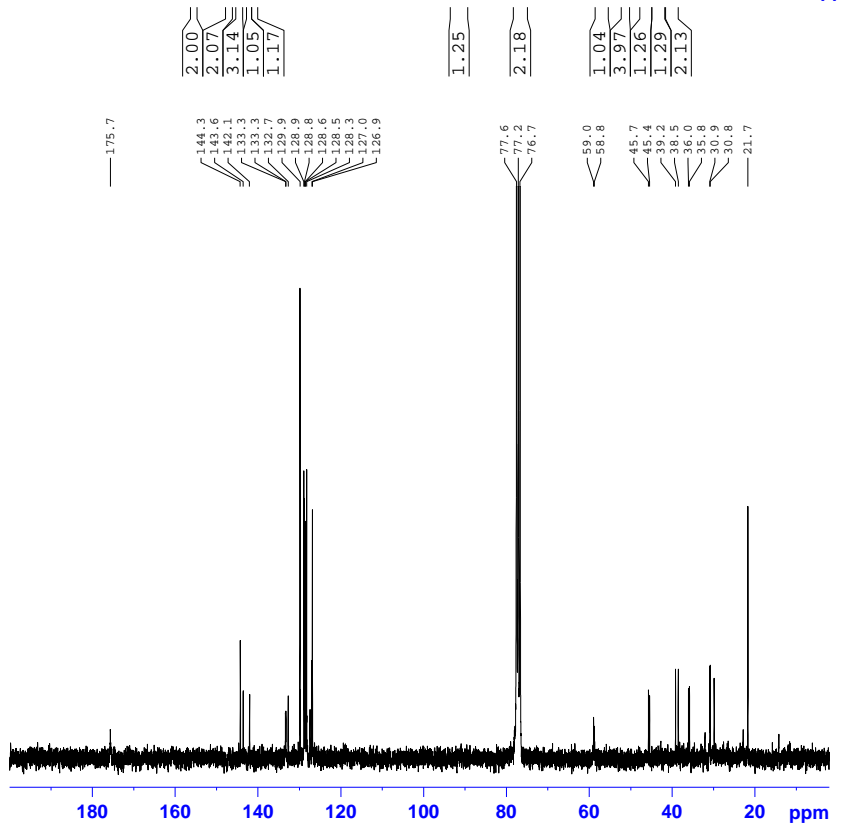

```

NAME      jwq-549a-075cg1
EXPNO    21
PROCNO   1
Date_    20130815
Time     8.02
INSTRUM  spect
PROBHD   5 mm DUL 13C-1
PULPROG  zgpg30
TD       65536
SOLVENT  CDCl3
NS       8378
DS       4
SWH      17985.611 Hz
FIDRES   0.274439 Hz
AQ       1.8219508 sec
RG       512
DW       27.800 usec
DE       6.50 usec
TE       303.3 K
D1       2.00000000 sec
D11      0.03000000 sec
TDO      1
===== CHANNEL f1 =====
NUC1     13C
P1       12.50 usec
PL1     2.00 dB
SFO1    75.4752953 MHz
===== CHANNEL f2 =====
CPDPRG2  waltz16
NUC2     1H
PCPD2    100.00 usec
PL2     3.00 dB
PL12    22.74 dB
PL13    23.00 dB
SFO2    300.1312005 MHz
SI       32768
SF       75.4677363 MHz
WDW      EM
SSB      0
LB       1.00 Hz
GB       0
PC       1.40
  
```

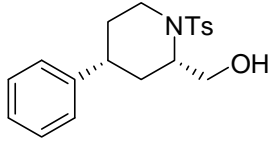

11c

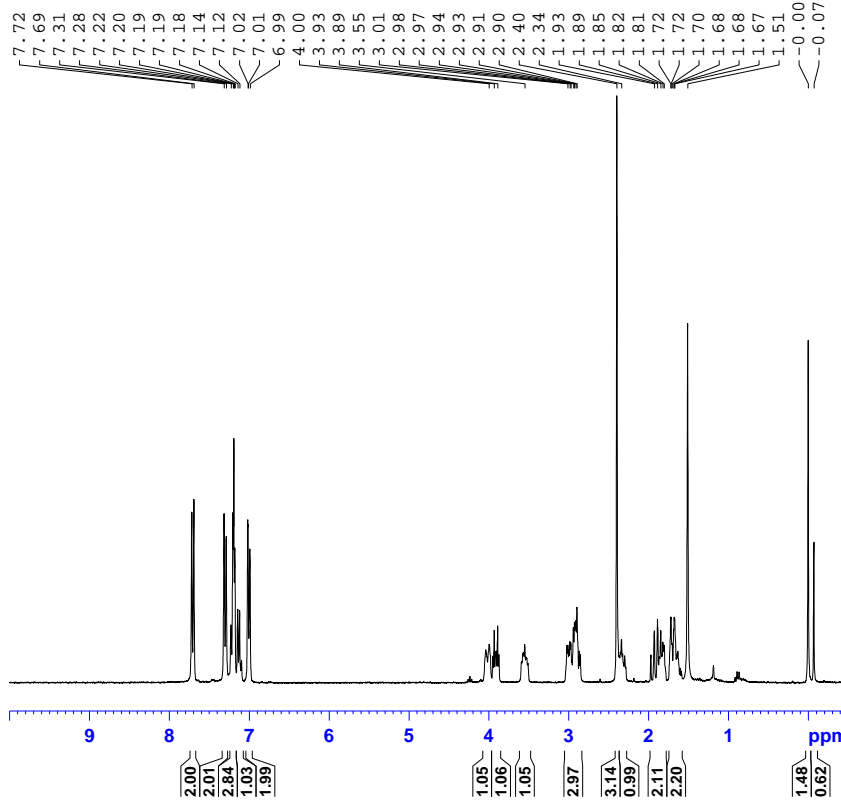

```

NAME      jwq-546b-072g1
EXPNO    30
PROCNO   1
Date_    20130730
Time     18.11
INSTRUM  spect
PROBHD   5 mm DUL 13C-1
PULPROG  zg30
TD       32768
SOLVENT  CDCl3
NS       13
DS       0
SWH      8992.806 Hz
FIDRES   0.274439 Hz
AQ       1.8219508 sec
RG       456.1
DW       55.600 usec
DE       6.50 usec
TE       301.3 K
D1       1.00000000 sec
TDO      1

===== CHANNEL f1 =====
NUC1     1H
P1       10.30 usec
PL1     3.00 dB
SFO1    300.1318534 MHz
SI       32768
SF      300.1300285 MHz
WDW      EM
SSB      0
LB       0.30 Hz
GB       0
PC       1.00

```

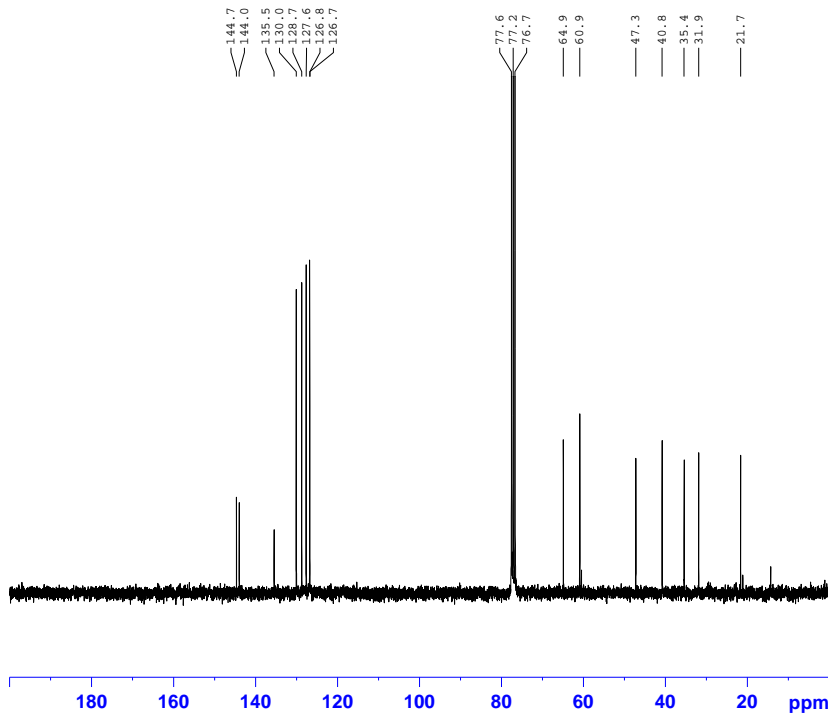

```

NAME      jwq-546b-072g1
EXPNO    11
PROCNO   1
Date_    20130729
Time     12.43
INSTRUM  spect
PROBHD   5 mm DUL 13C-1
PULPROG  zgpg30
TD       65536
SOLVENT  CDCl3
NS       699
DS       4
SWH      17985.611 Hz
FIDRES   0.274439 Hz
AQ       1.8219508 sec
RG       456.1
DW       27.800 usec
DE       6.50 usec
TE       302.2 K
D1       2.00000000 sec
D11      0.03000000 sec
TDO      1

===== CHANNEL f1 =====
NUC1     13C
P1       12.50 usec
PL1     2.00 dB
SFO1    75.4752953 MHz

===== CHANNEL f2 =====
CPDPRG2  waltz16
NUC2     1H
PCPD2    100.00 usec
PL2     3.00 dB
PL12    22.74 dB
PL13    23.00 dB
SFO2    300.1312005 MHz
SI       32768
SF      75.4677375 MHz
WDW      EM
SSB      0
LB       1.00 Hz
GB       0
PC       1.40

```

### Part III HPLC Spectra

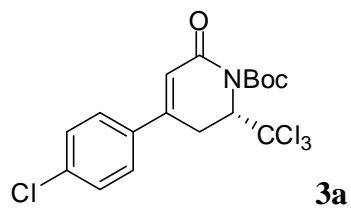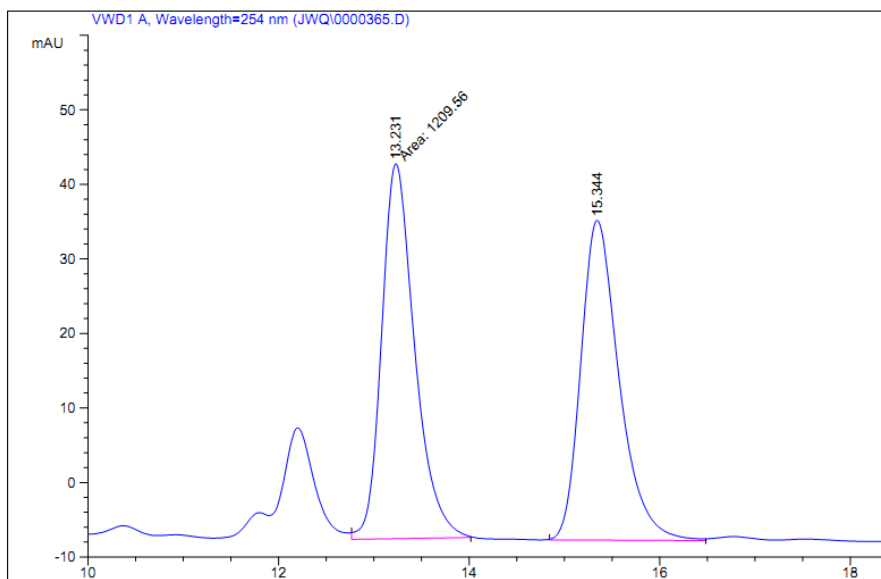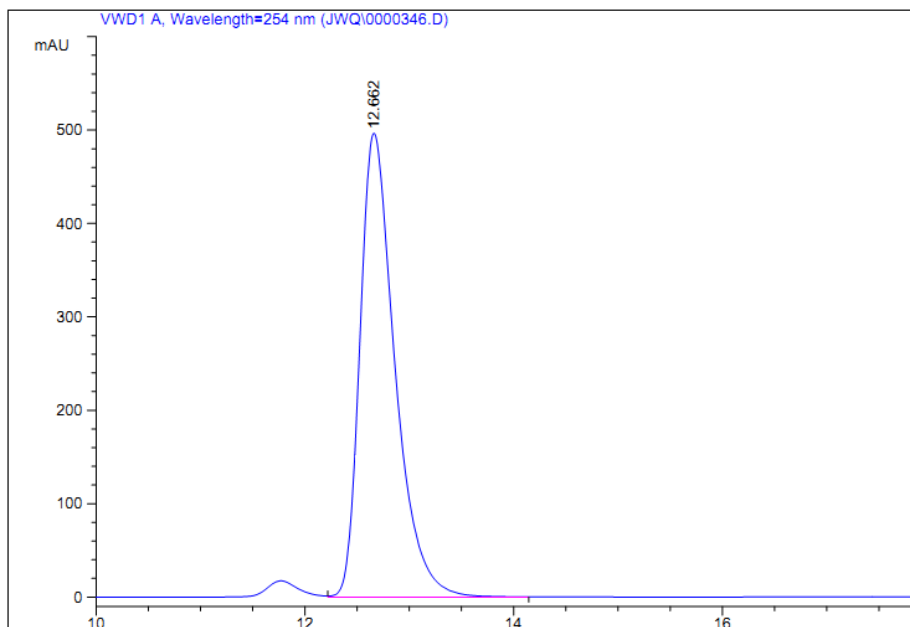

| Peak # | RetTime [min] | Type | Width [min] | Area mAU *s | Height [mAU] | Area %   |
|--------|---------------|------|-------------|-------------|--------------|----------|
| 1      | 12.662        | VB   | 0.3521      | 1.15151e4   | 496.60318    | 100.0000 |

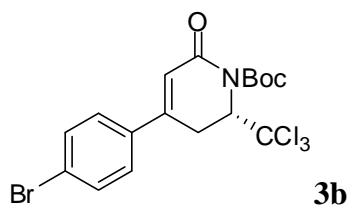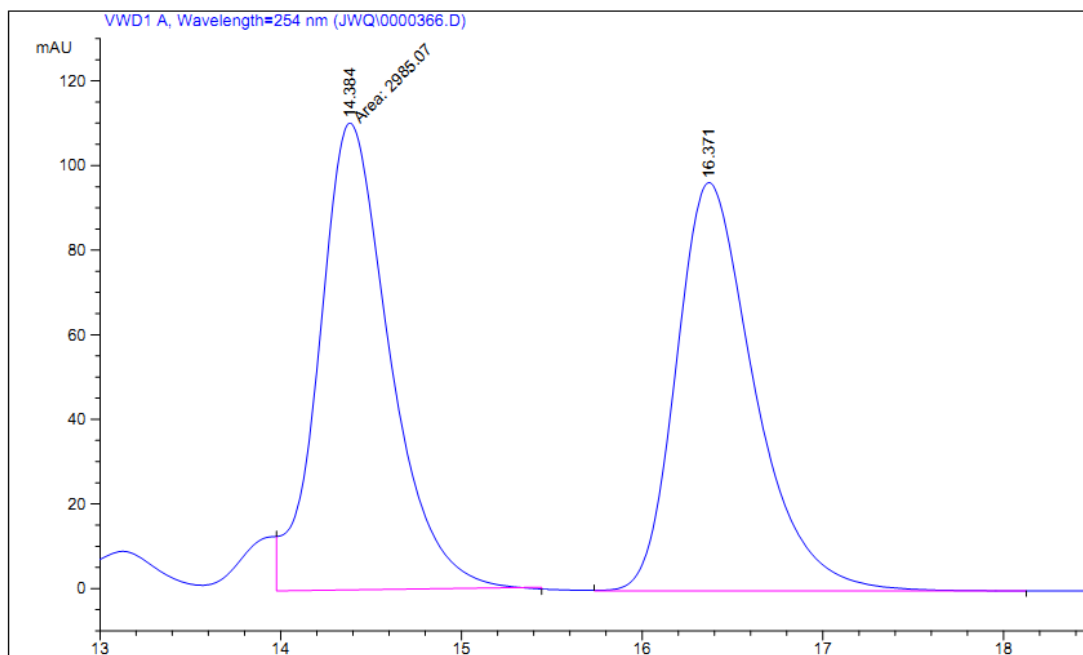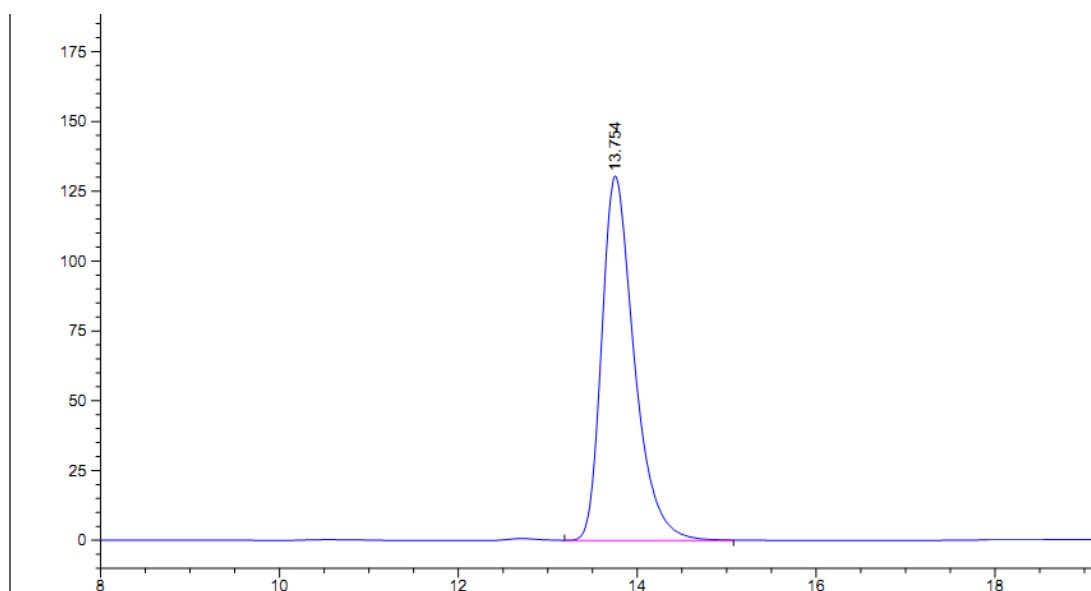

| Peak # | RetTime [min] | Type | Width [min] | Area mAU   | Height [mAU] | Area %   |
|--------|---------------|------|-------------|------------|--------------|----------|
| 1      | 13.754        | VB   | 0.3818      | 3293.33813 | 130.49788    | 100.0000 |

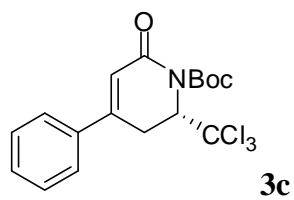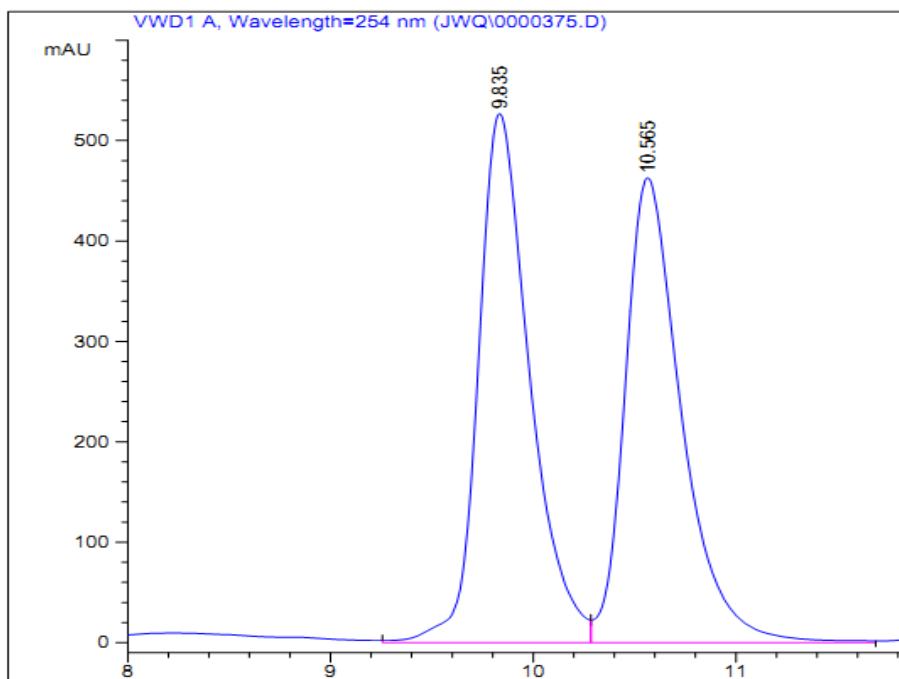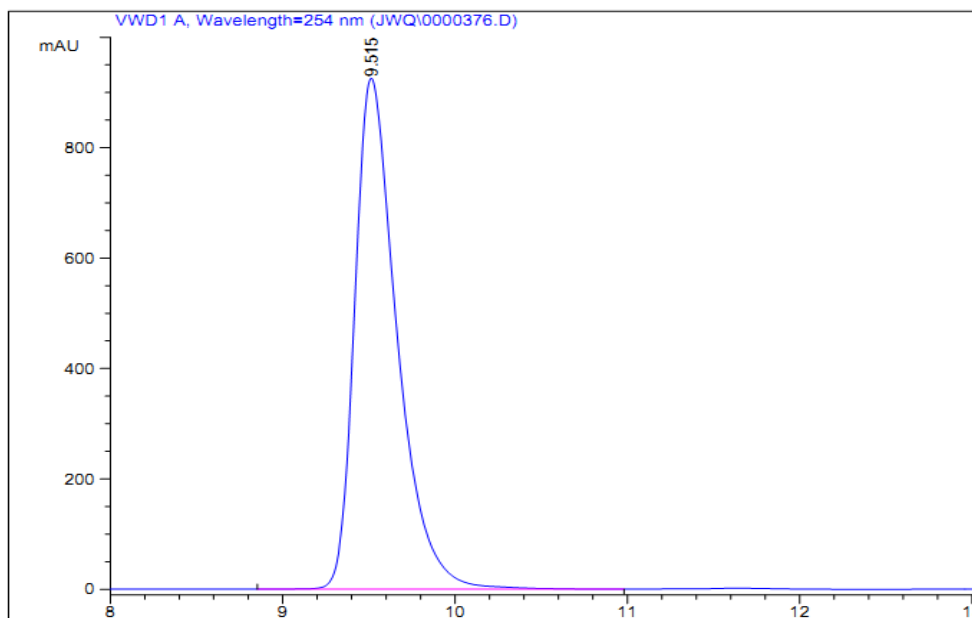

| Peak # | RetTime [min] | Type | Width [min] | Area mAU *s | Height [mAU] | Area %   |
|--------|---------------|------|-------------|-------------|--------------|----------|
| 1      | 9.515         | VB   | 0.2576      | 1.58108e4   | 925.36346    | 100.0000 |



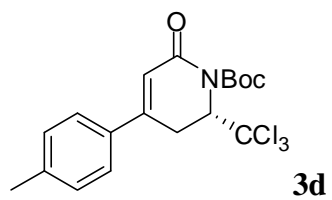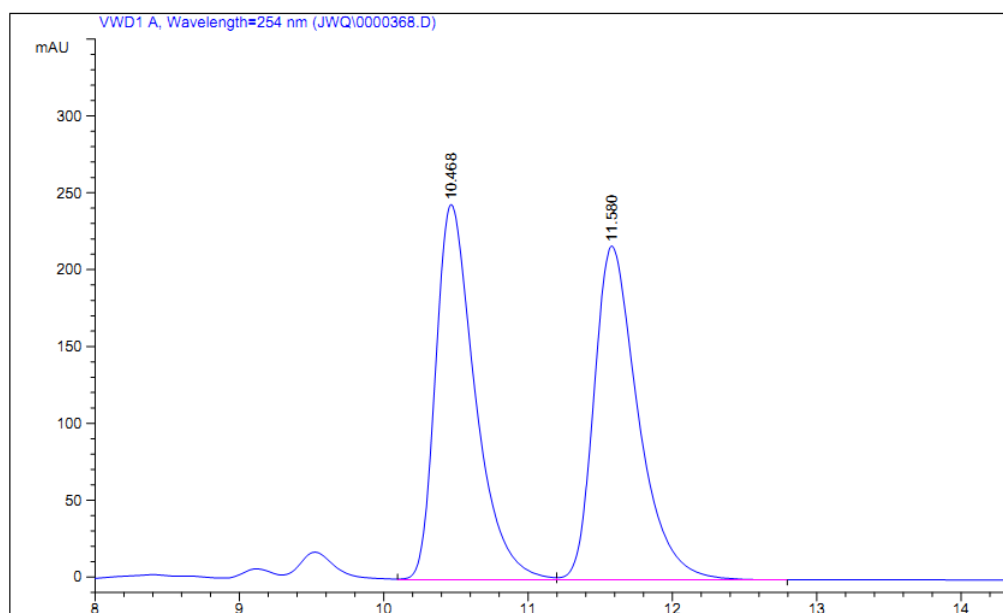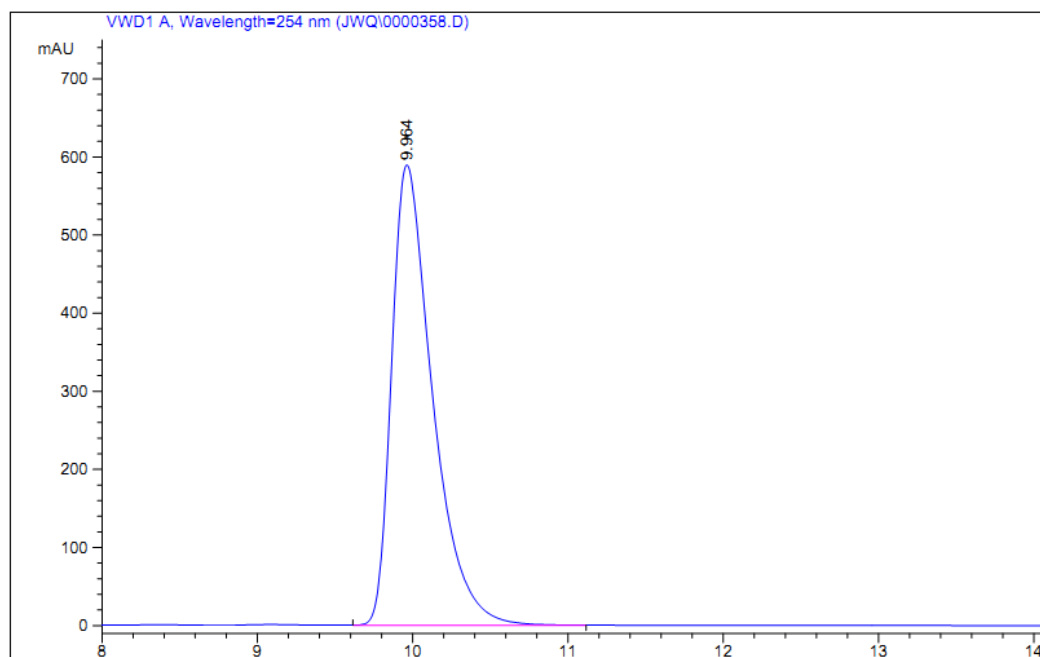

| Peak # | RetTime [min] | Type | Width [min] | Area mAU *s | Height [mAU] | Area %   |
|--------|---------------|------|-------------|-------------|--------------|----------|
| 1      | 9.964         | VB   | 0.2775      | 1.07845e4   | 589.50562    | 100.0000 |

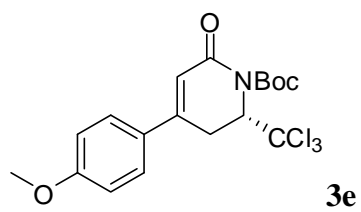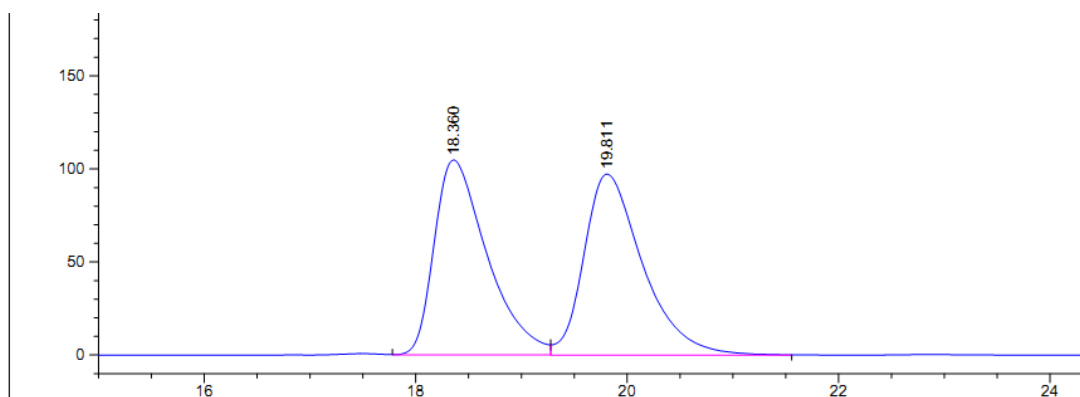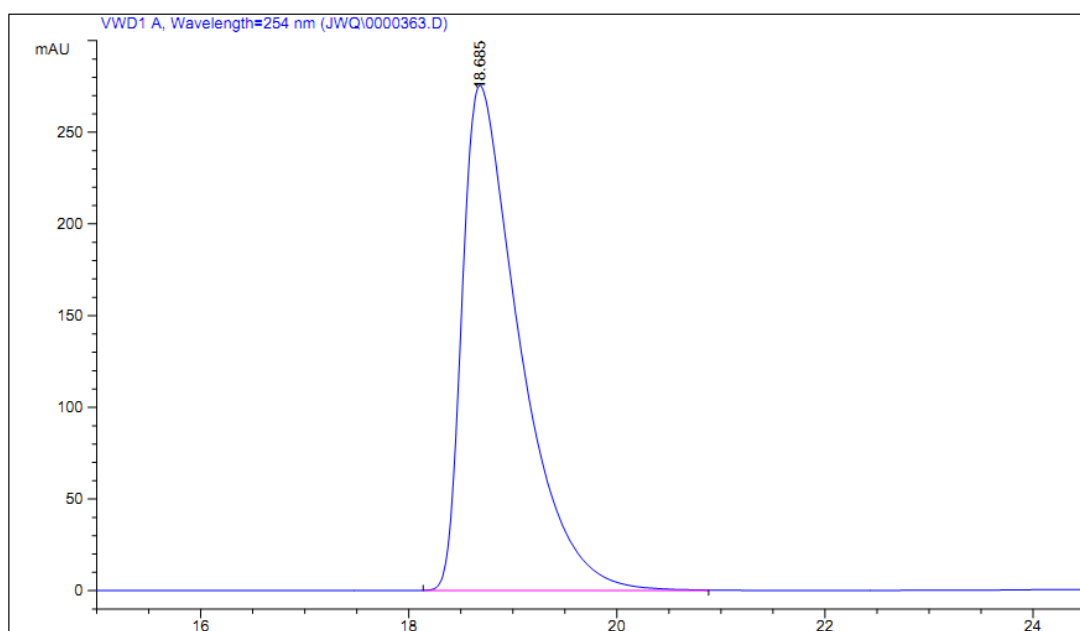

| Peak # | RetTime [min] | Type | Width [min] | Area mAU *s | Height [mAU] | Area %   |
|--------|---------------|------|-------------|-------------|--------------|----------|
| 1      | 18.685        | BB   | 0.5643      | 1.04982e4   | 275.30875    | 100.0000 |

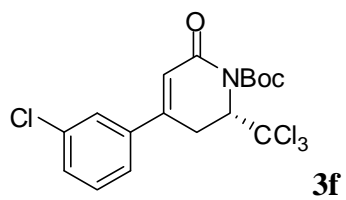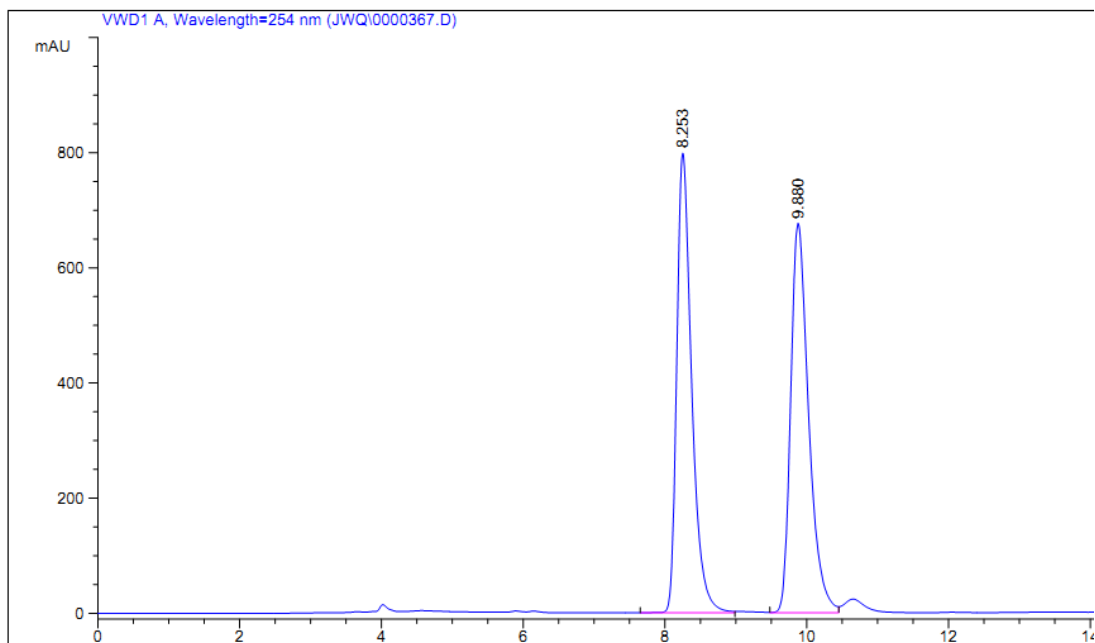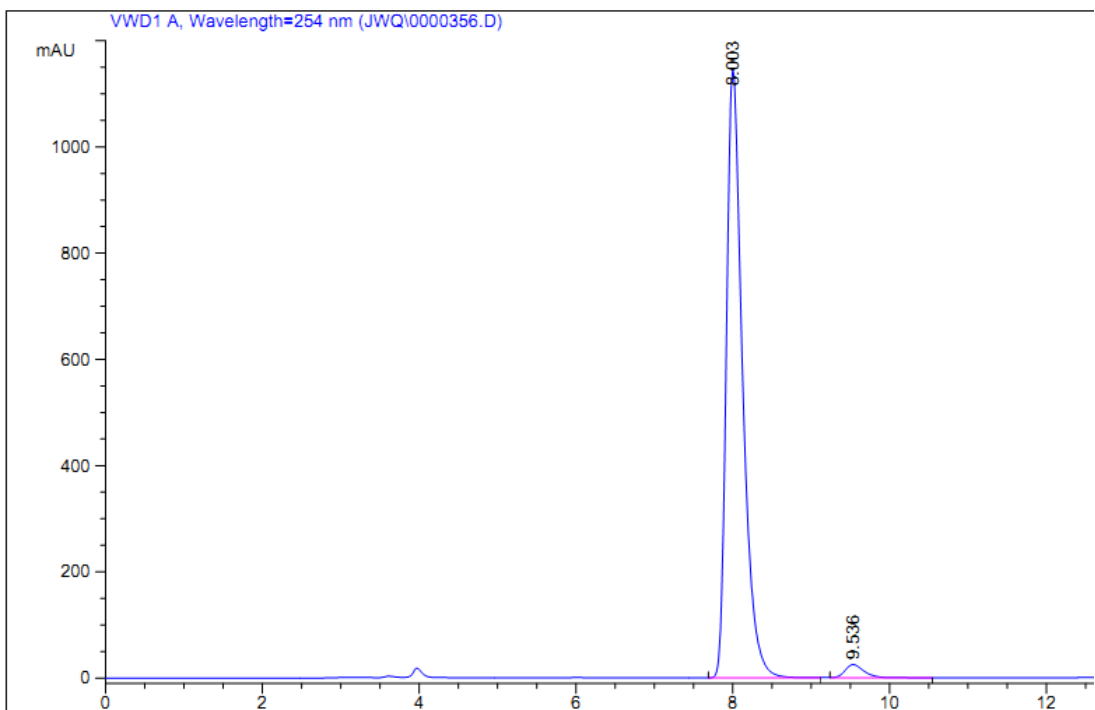

| Peak # | RetTime [min] | Type | Width [min] | Area mAU *s | Height [mAU] | Area %  |
|--------|---------------|------|-------------|-------------|--------------|---------|
| 1      | 8.003         | BB   | 0.2162      | 1.63734e4   | 1145.80591   | 97.3796 |
| 2      | 9.536         | BB   | 0.2642      | 440.59320   | 25.31360     | 2.6204  |

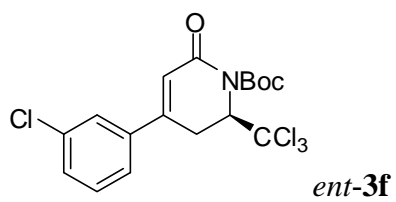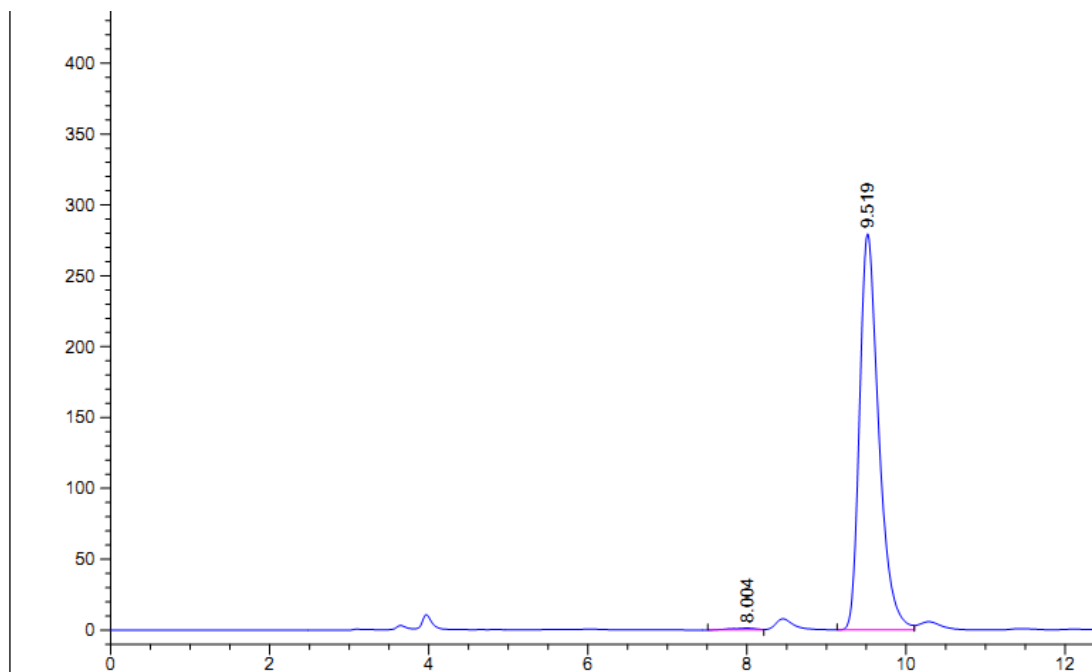

| Peak # | RetTime [min] | Type | Width [min] | Area mAU *s | Height [mAU] | Area %  |
|--------|---------------|------|-------------|-------------|--------------|---------|
| 1      | 8.004         | BV   | 0.2950      | 29.84758    | 1.40183      | 0.6342  |
| 2      | 9.519         | VV   | 0.2534      | 4676.70117  | 279.50513    | 99.3658 |

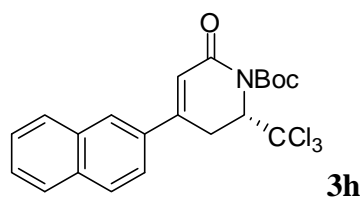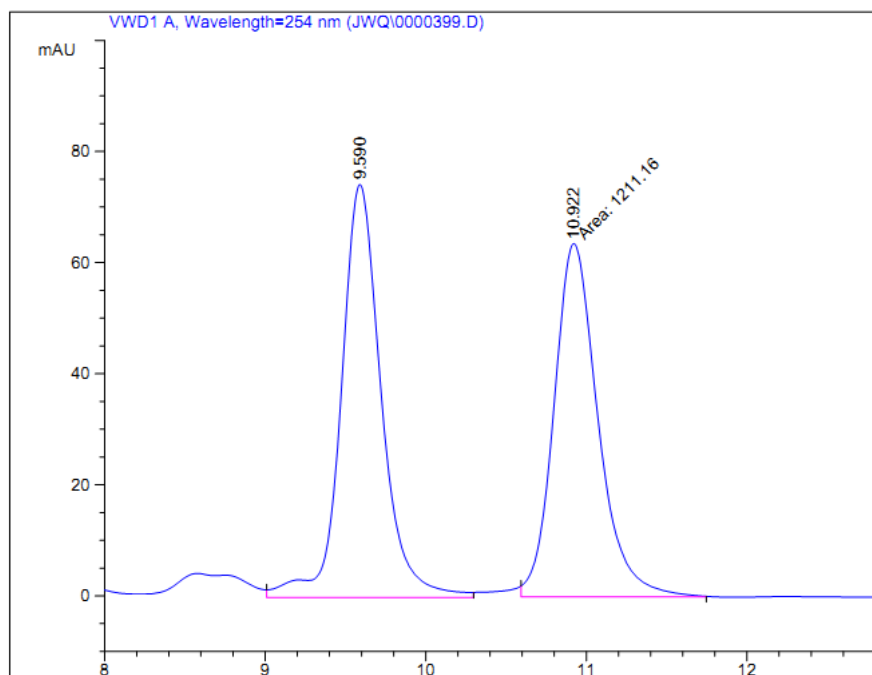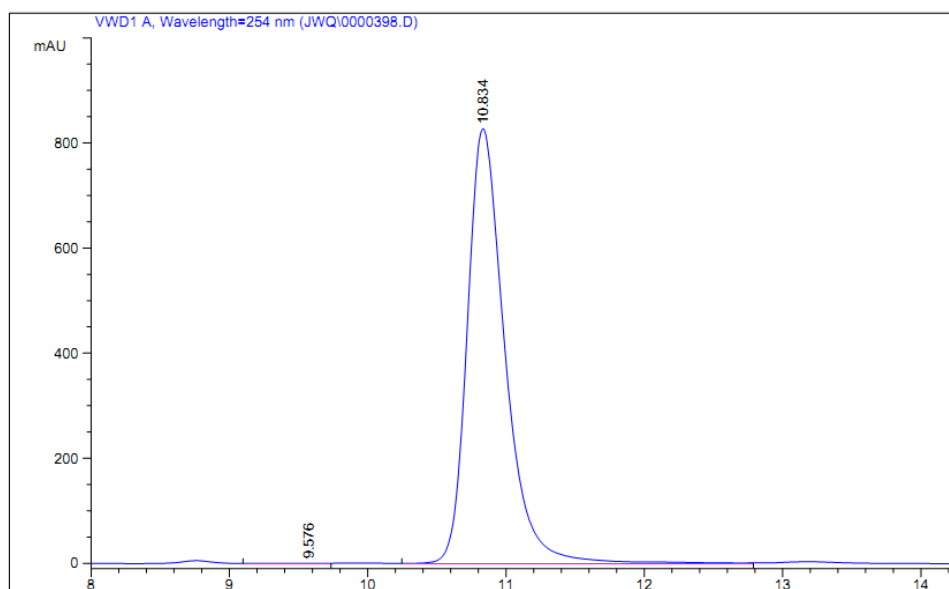

| Peak # | RetTime [min] | Type | Width [min] | Area mAU *s | Height [mAU] | Area %  |
|--------|---------------|------|-------------|-------------|--------------|---------|
| 1      | 9.576         | VV   | 0.3473      | 18.88475    | 7.32639e-1   | 0.1204  |
| 2      | 10.834        | VV   | 0.2879      | 1.56705e4   | 827.58899    | 99.8796 |

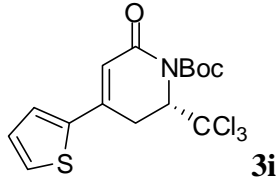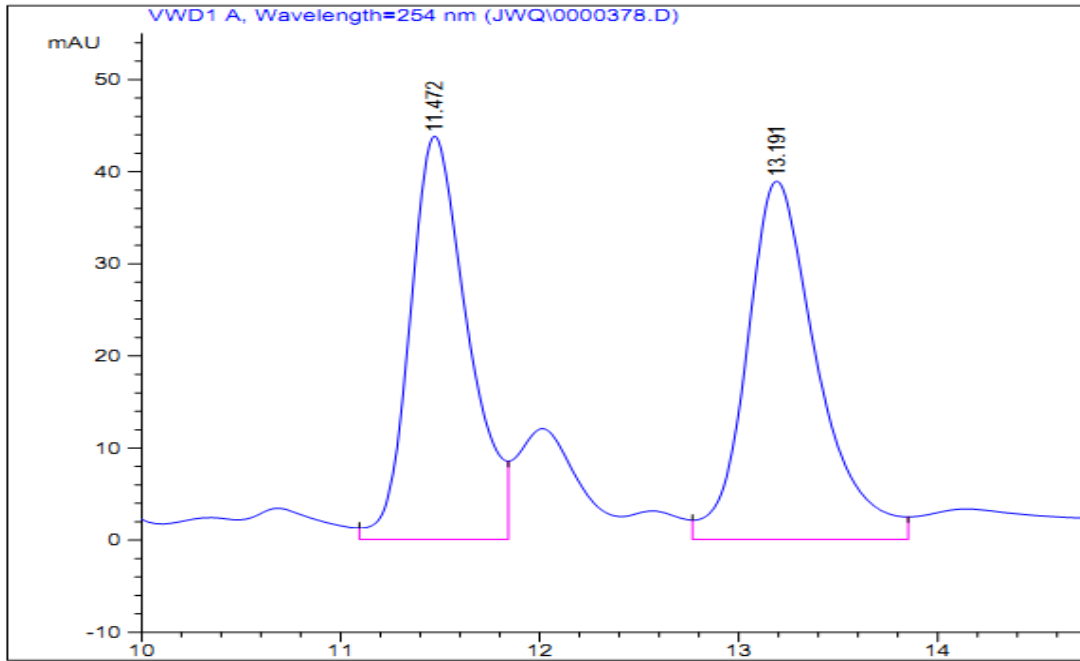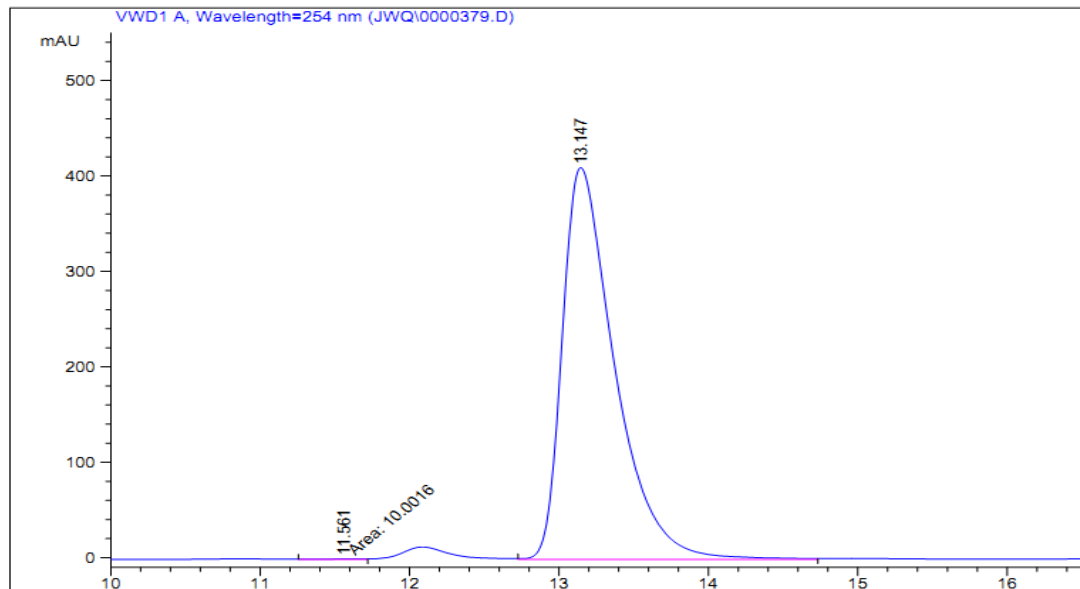

| Peak # | RetTime [min] | Type | Width [min] | Area mAU *s | Height [mAU] | Area %  |
|--------|---------------|------|-------------|-------------|--------------|---------|
| 1      | 11.561        | MM   | 0.3284      | 10.00163    | 5.07655e-1   | 0.1000  |
| 2      | 13.147        | VV   | 0.3655      | 9994.08008  | 410.54727    | 99.9000 |

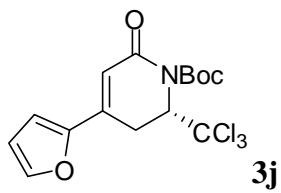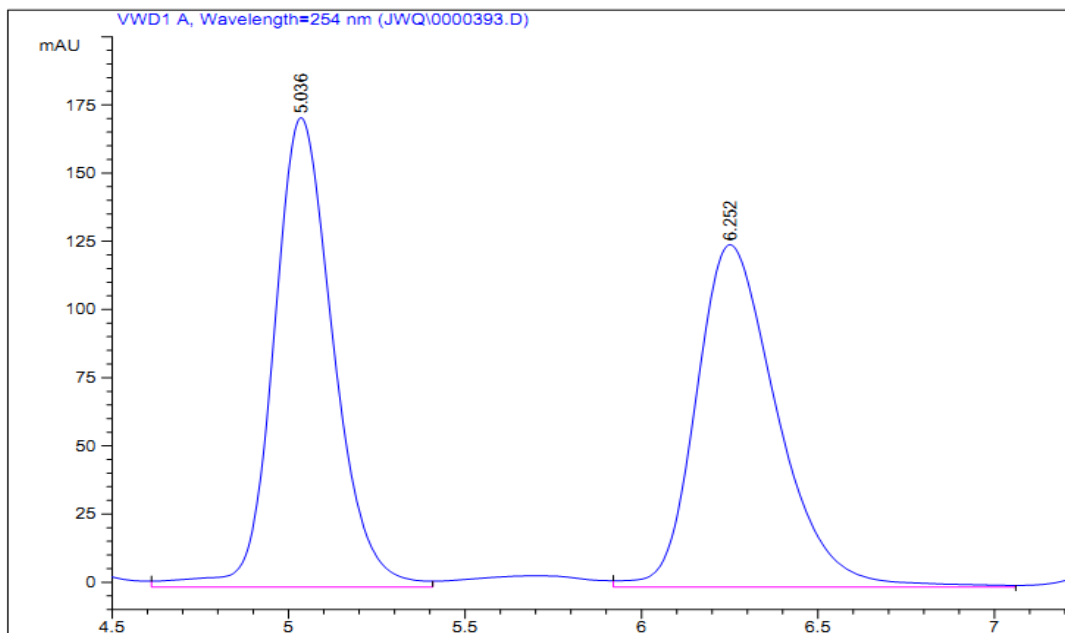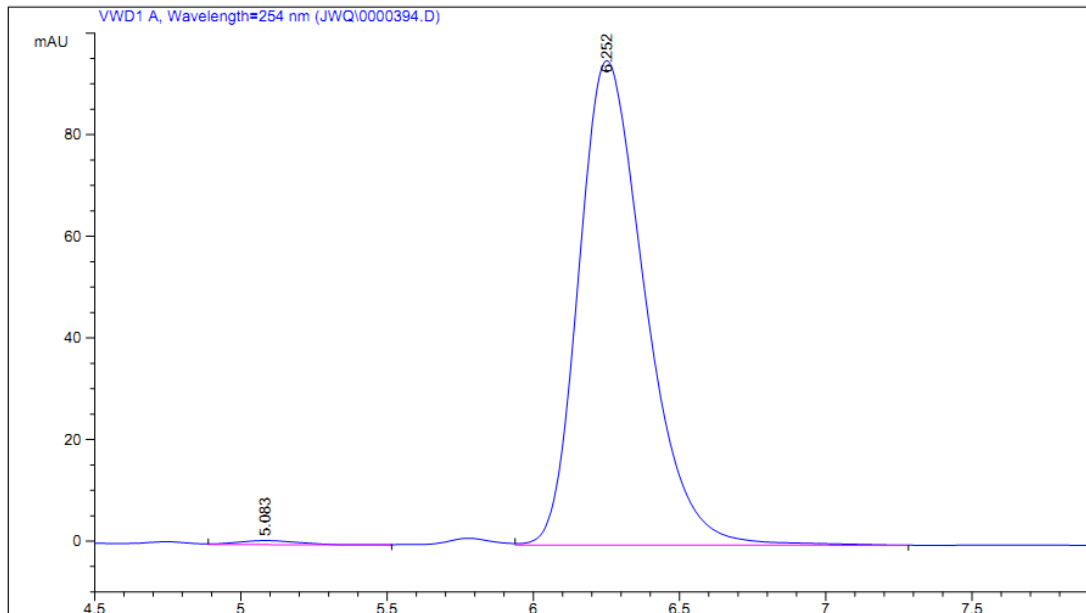

| Peak # | RetTime [min] | Type | Width [min] | Area mAU *s | Height [mAU] | Area %  |
|--------|---------------|------|-------------|-------------|--------------|---------|
| 1      | 5.083         | VB   | 0.2318      | 11.75584    | 8.17676e-1   | 0.7779  |
| 2      | 6.252         | VB   | 0.2448      | 1499.52490  | 95.26770     | 99.2221 |

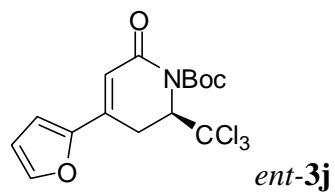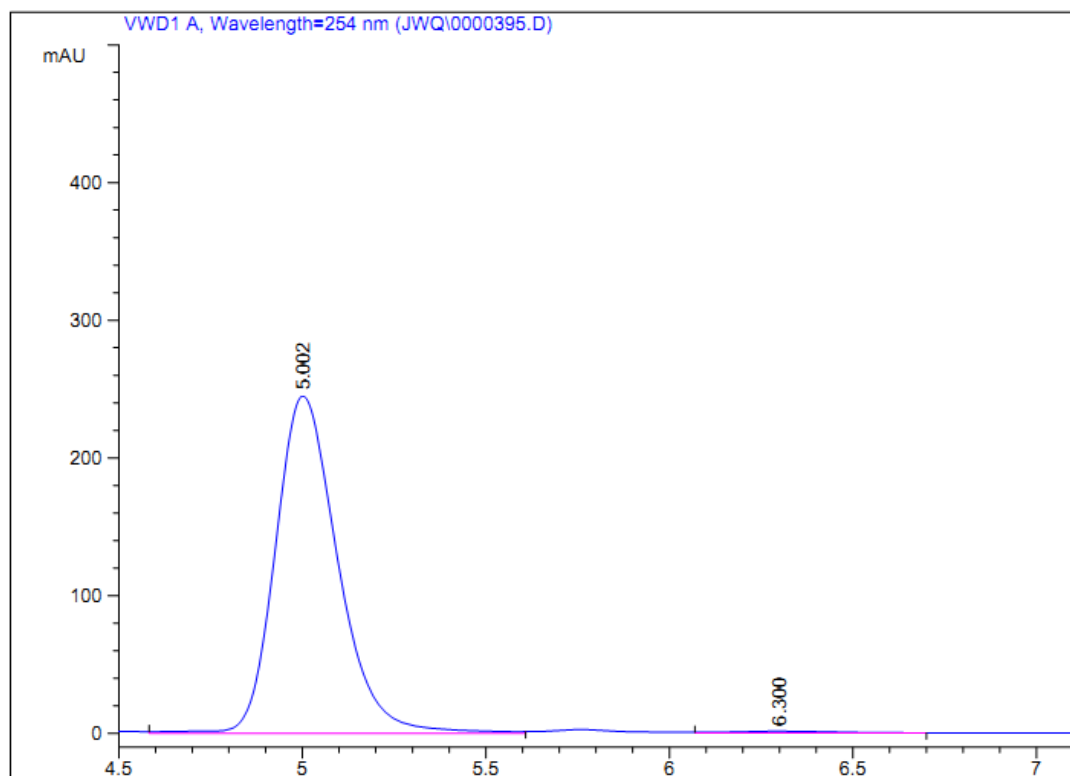

| Peak # | RetTime [min] | Type | Width [min] | Area mAU *s | Height [mAU] | Area %  |
|--------|---------------|------|-------------|-------------|--------------|---------|
| 1      | 5.002         | VV   | 0.1816      | 2895.33154  | 244.83955    | 99.1139 |
| 2      | 6.300         | VB   | 0.2739      | 25.88619    | 1.40070      | 0.8861  |



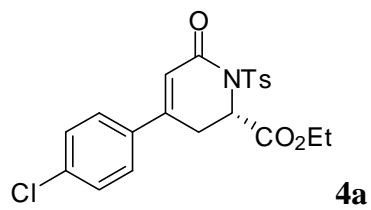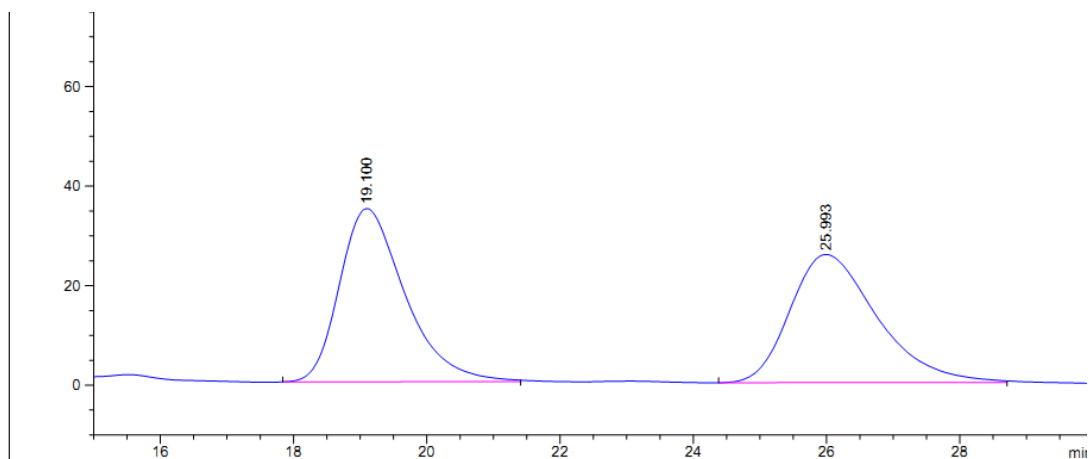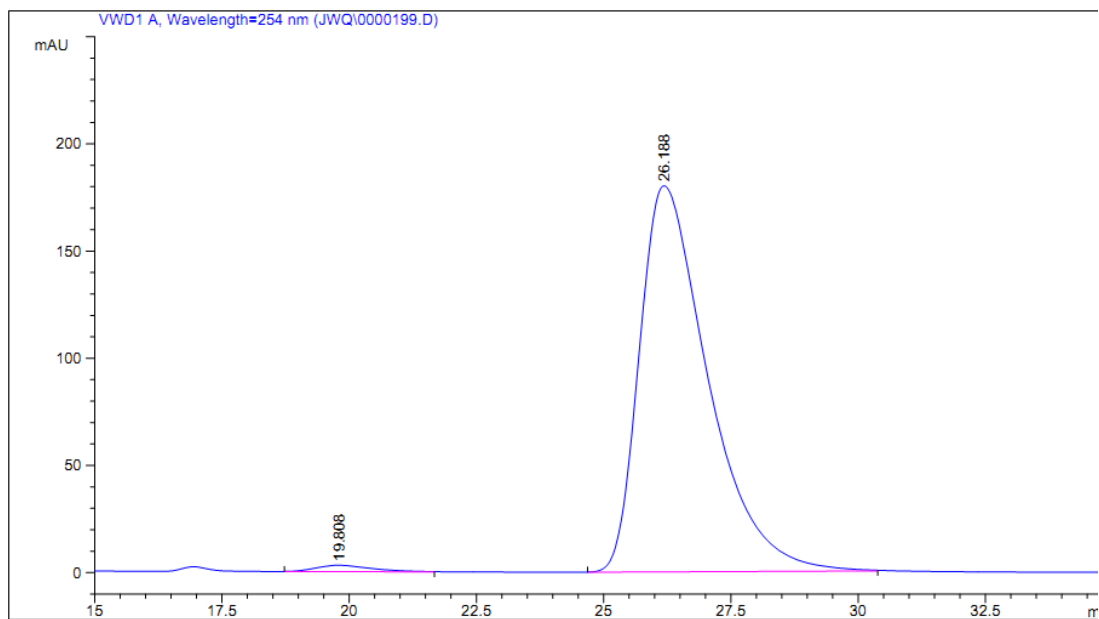

| Peak # | RetTime [min] | Type | Width [min] | Area mAU *s | Height [mAU] | Area %  |
|--------|---------------|------|-------------|-------------|--------------|---------|
| 1      | 19.808        | BB   | 1.1094      | 225.61183   | 2.97342      | 1.3217  |
| 2      | 26.188        | BB   | 1.4175      | 1.68448e4   | 180.06673    | 98.6783 |

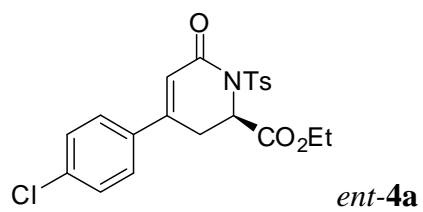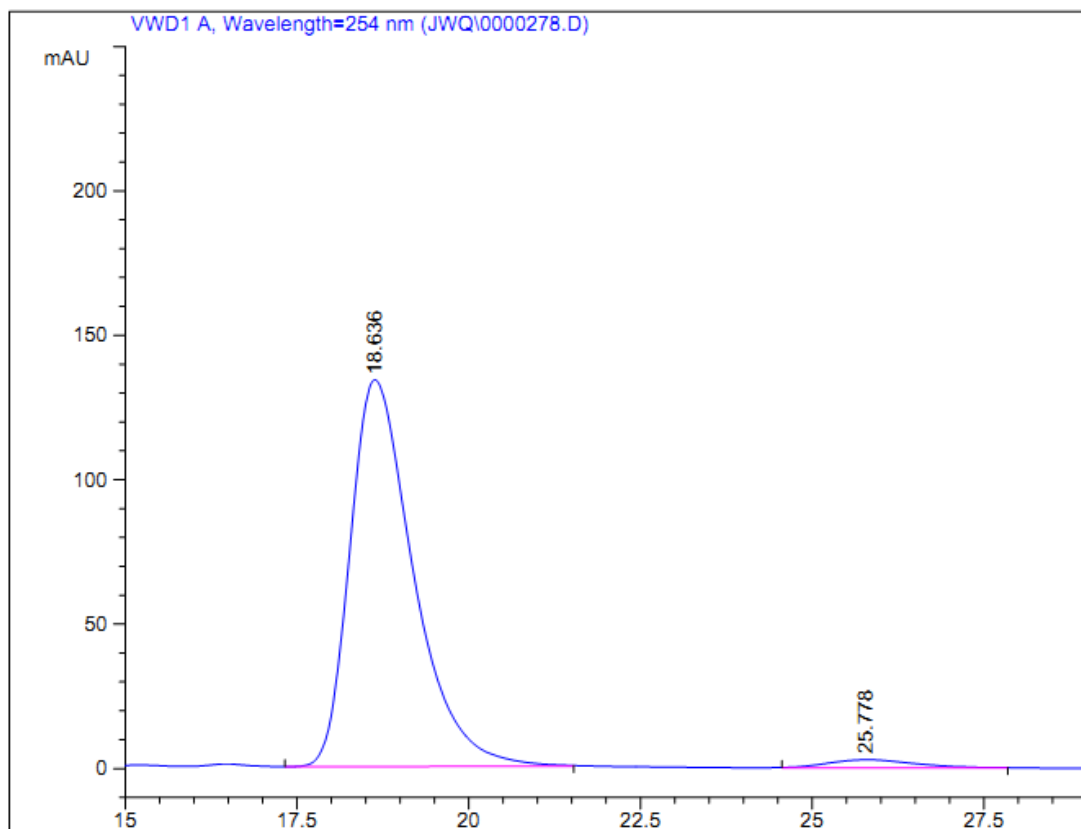

| Peak # | RetTime [min] | Type | Width [min] | Area mAU *s | Height [mAU] | Area %  |
|--------|---------------|------|-------------|-------------|--------------|---------|
| 1      | 18.636        | VB   | 0.9764      | 8599.90234  | 133.91527    | 97.1988 |
| 2      | 25.778        | BB   | 1.2642      | 247.84453   | 2.79601      | 2.8012  |

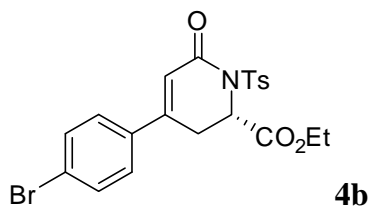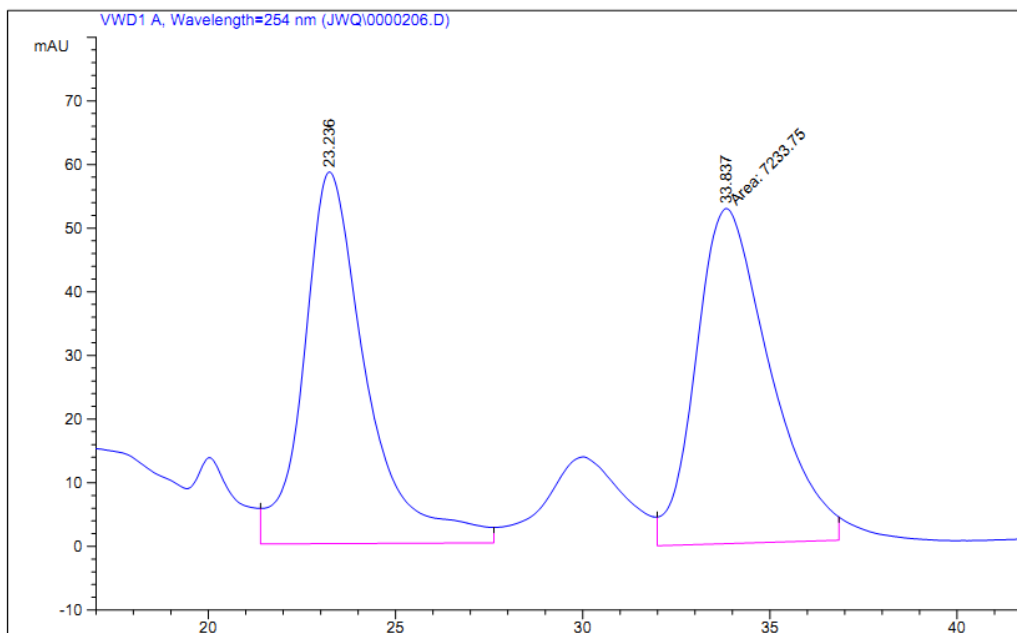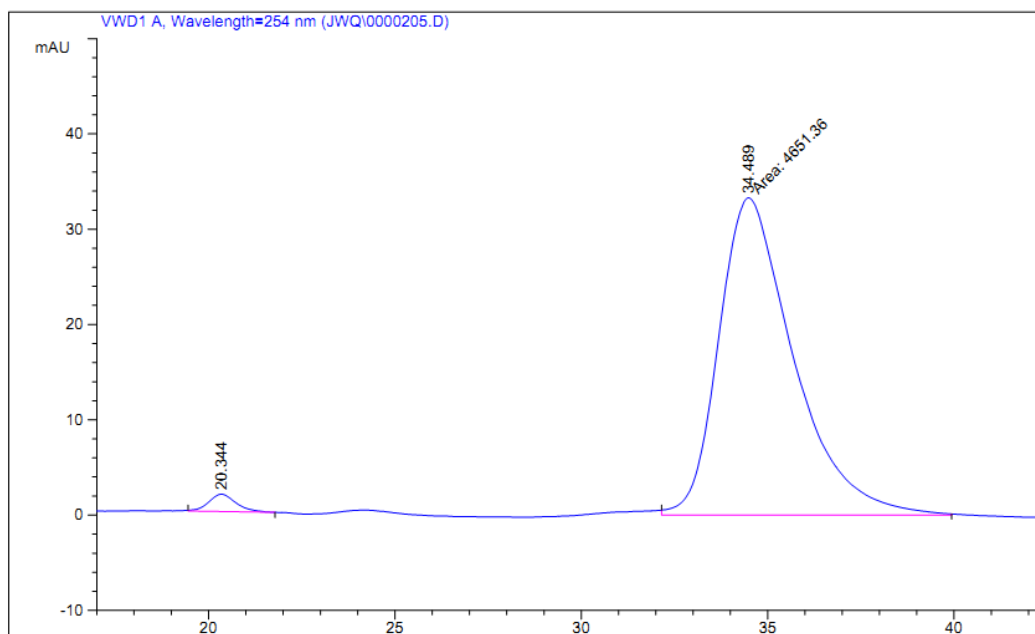

| Peak # | RetTime [min] | Type | Width [min] | Area mAU *s | Height [mAU] | Area %  |
|--------|---------------|------|-------------|-------------|--------------|---------|
| 1      | 20.344        | BB   | 0.7550      | 92.84692    | 1.82095      | 1.9571  |
| 2      | 34.489        | MM   | 2.3274      | 4651.36084  | 33.30821     | 98.0429 |

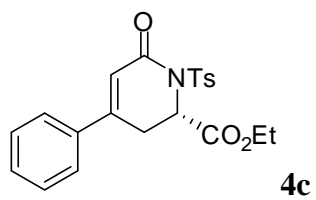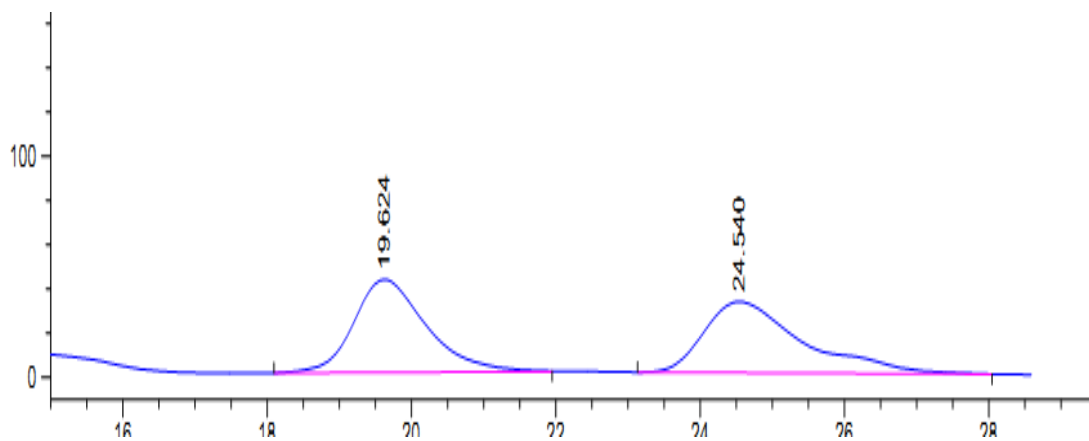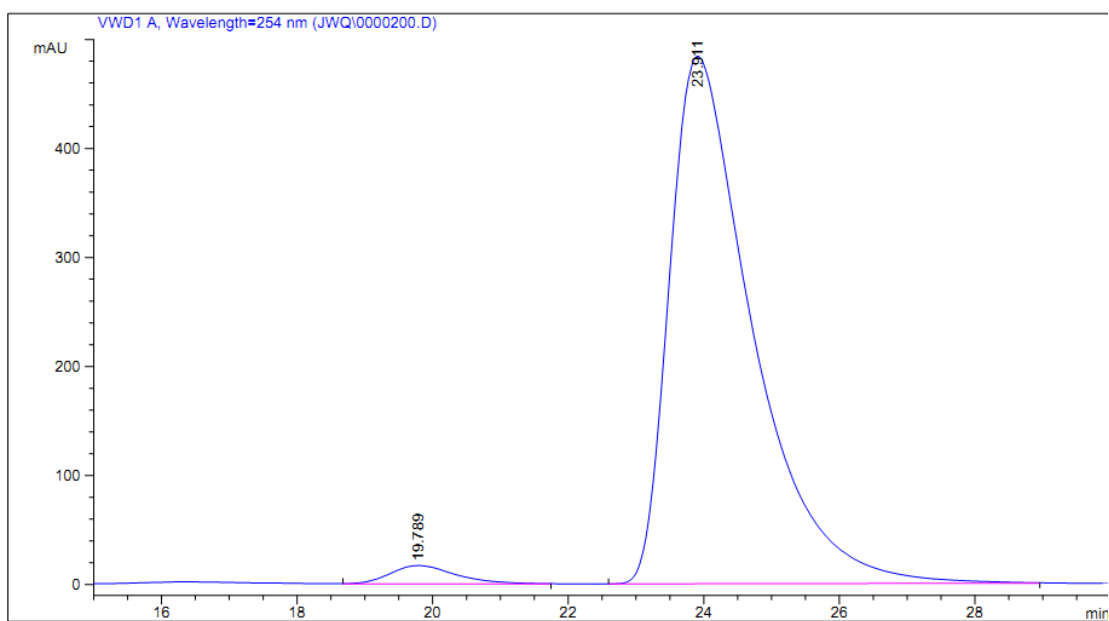

| Peak # | RetTime [min] | Type | Width [min] | Area mAU *s | Height [mAU] | Area %  |
|--------|---------------|------|-------------|-------------|--------------|---------|
| 1      | 19.789        | BB   | 1.0187      | 1122.24451  | 16.78656     | 2.6605  |
| 2      | 23.911        | BB   | 1.2635      | 4.10593e4   | 483.98441    | 97.3395 |

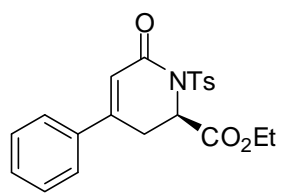

*ent-4c*

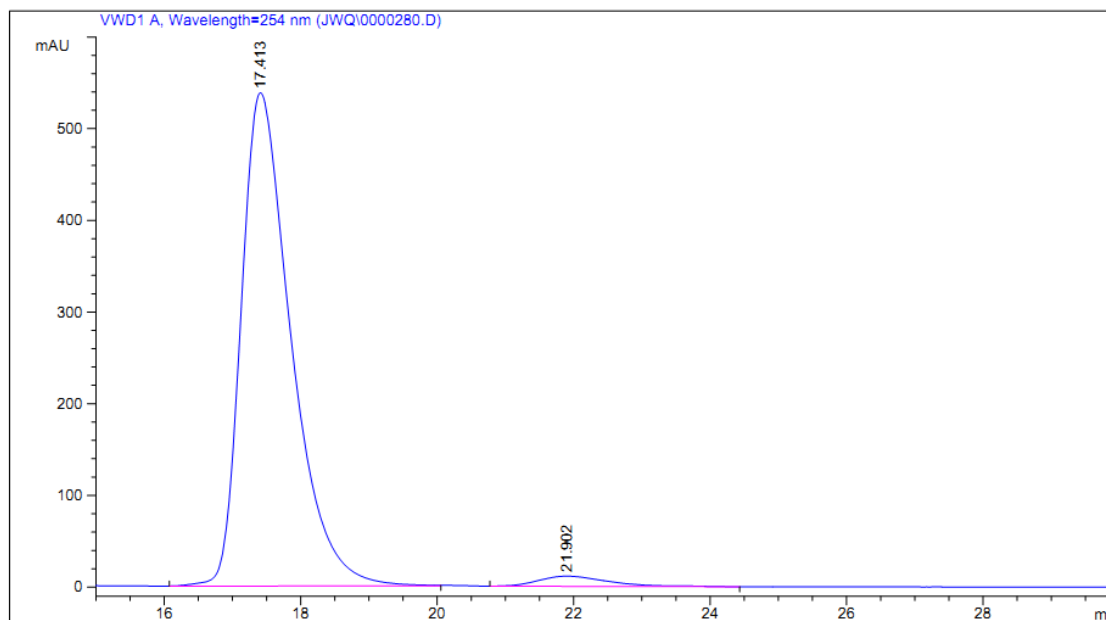

| Peak # | RetTime [min] | Type | Width [min] | Area mAU *s | Height [mAU] | Area %  |
|--------|---------------|------|-------------|-------------|--------------|---------|
| 1      | 17.413        | BB   | 0.7678      | 2.72192e4   | 538.04852    | 97.2043 |
| 2      | 21.902        | BB   | 1.0509      | 782.85608   | 11.12638     | 2.7957  |

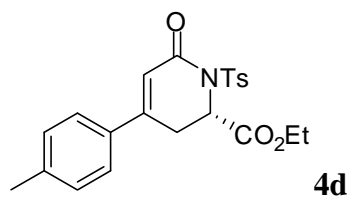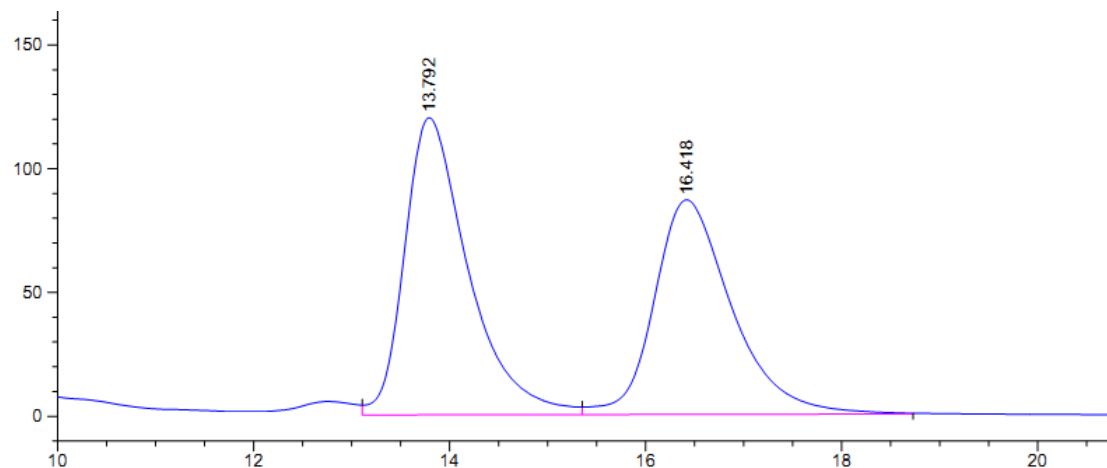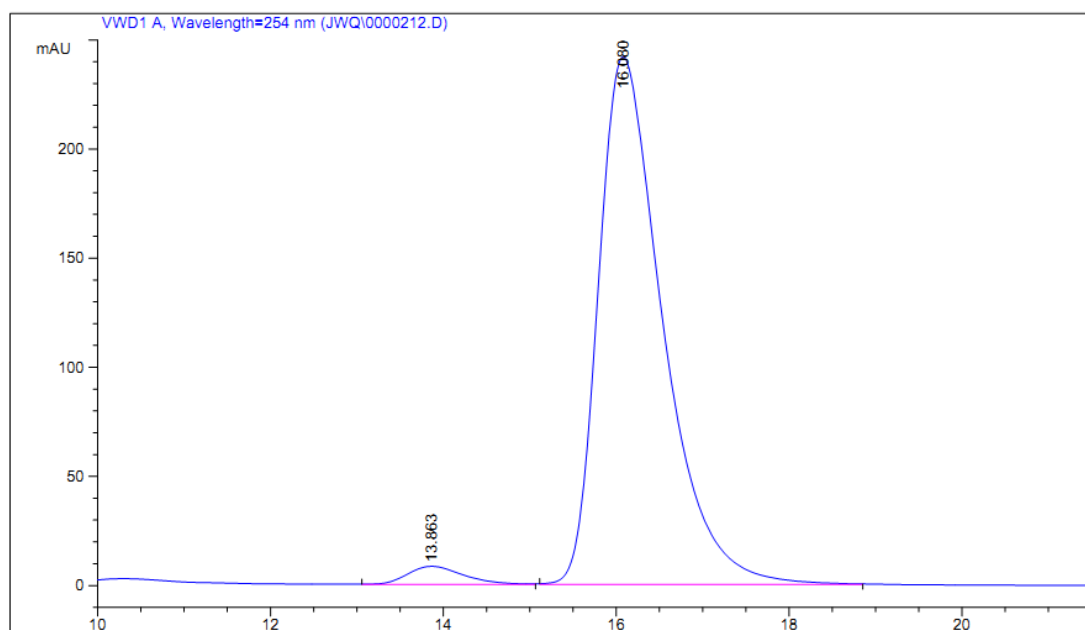

| Peak # | RetTime [min] | Type | Width [min] | Area mAU * s | Height [mAU] | Area %  |
|--------|---------------|------|-------------|--------------|--------------|---------|
| 1      | 13.863        | BB   | 0.6876      | 366.44202    | 8.28829      | 2.8566  |
| 2      | 16.080        | BB   | 0.7819      | 1.24614e4    | 241.74977    | 97.1434 |

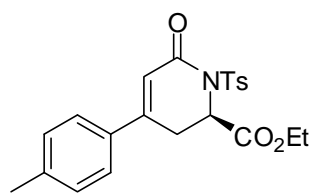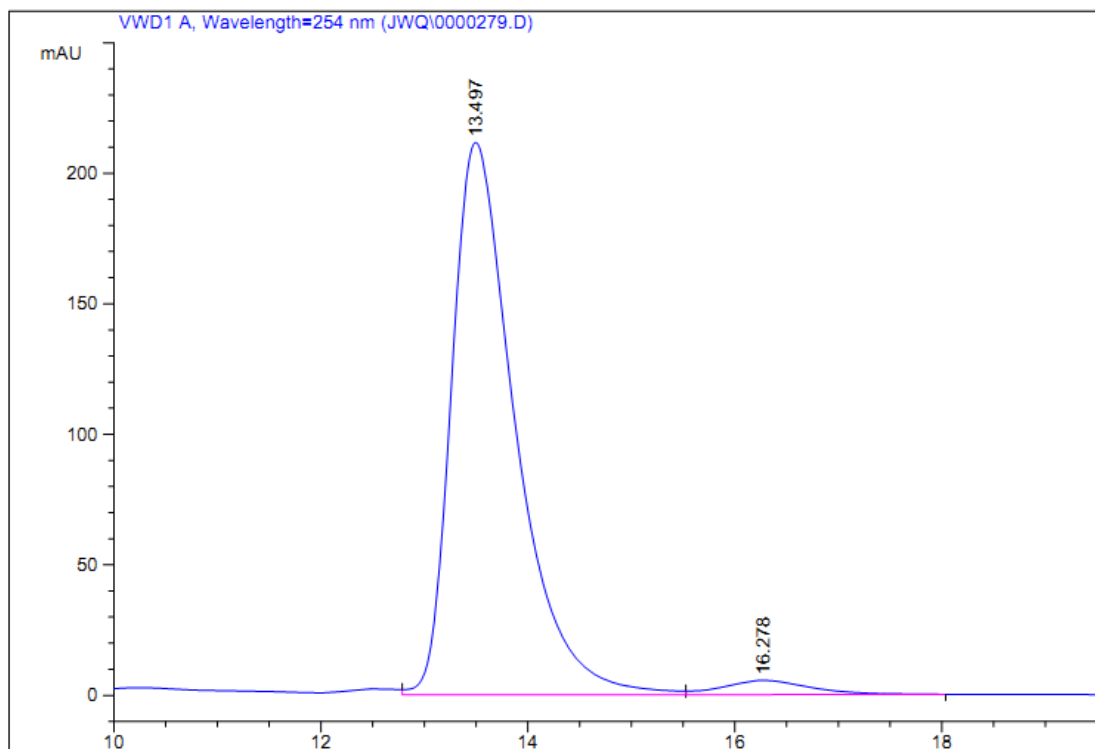

| Peak # | RetTime [min] | Type | Width [min] | Area mAU *s | Height [mAU] | Area %  |
|--------|---------------|------|-------------|-------------|--------------|---------|
| 1      | 13.497        | VV   | 0.6436      | 9033.10645  | 211.62572    | 96.5996 |
| 2      | 16.278        | VB   | 0.8552      | 317.97220   | 5.47500      | 3.4004  |

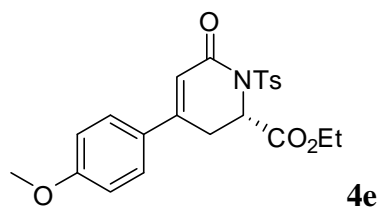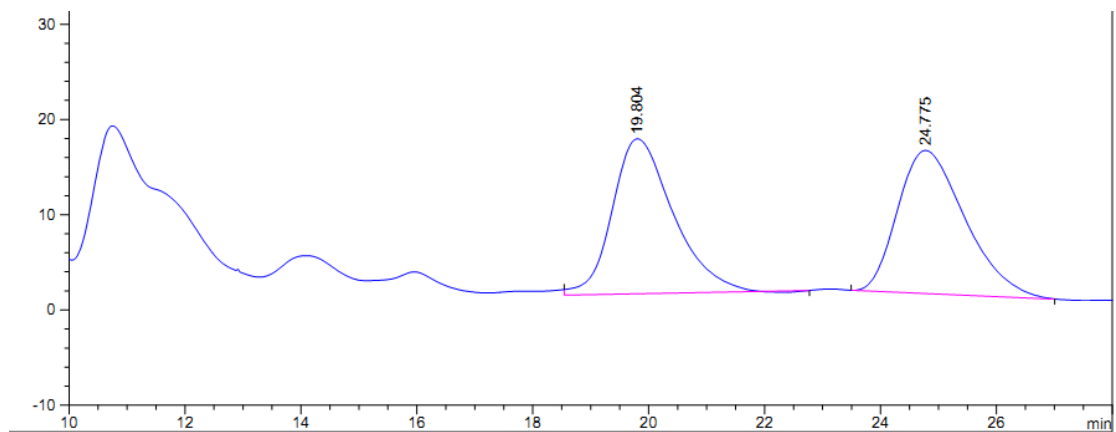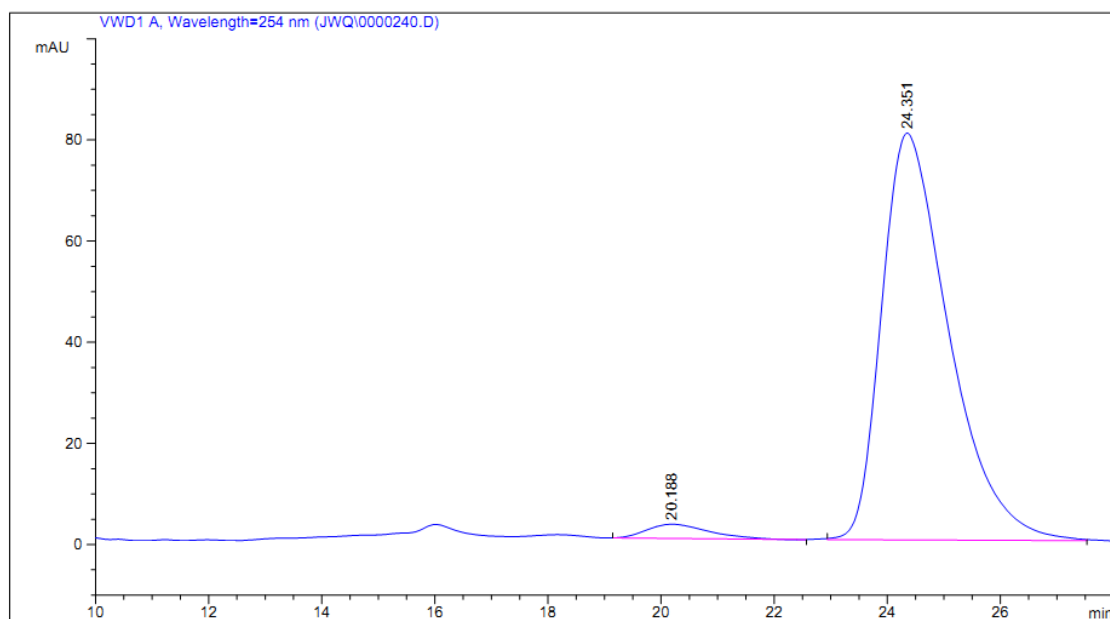

| Peak # | RetTime [min] | Type | Width [min] | Area mAU *s | Height [mAU] | Area %  |
|--------|---------------|------|-------------|-------------|--------------|---------|
| 1      | 20.188        | BB   | 1.0734      | 211.19847   | 2.80526      | 3.0852  |
| 2      | 24.351        | BB   | 1.2536      | 6634.38184  | 80.42169     | 96.9148 |



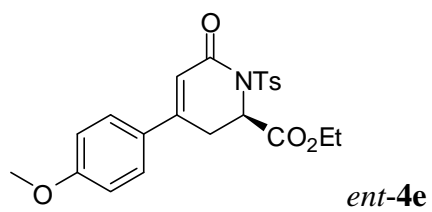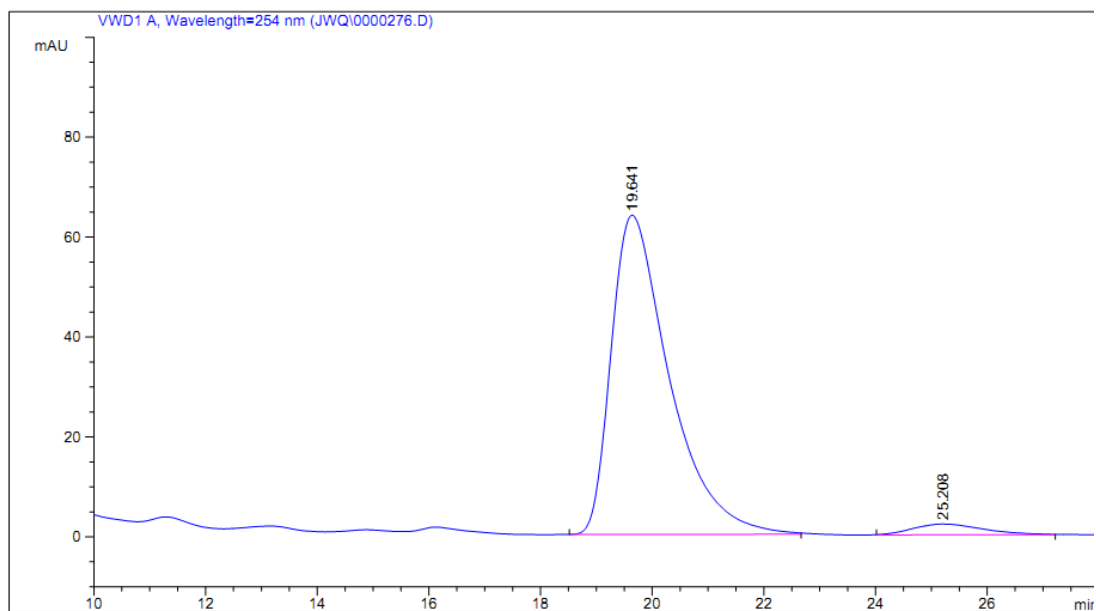

| Peak # | RetTime [min] | Type | Width [min] | Area mAU *s | Height [mAU] | Area %  |
|--------|---------------|------|-------------|-------------|--------------|---------|
| 1      | 19.641        | BB   | 1.0915      | 4622.03711  | 63.89582     | 96.1170 |
| 2      | 25.208        | BB   | 1.1561      | 186.72440   | 2.15582      | 3.8830  |

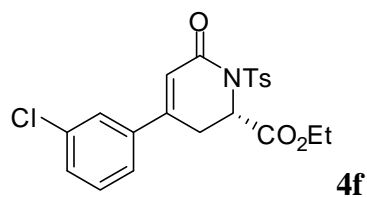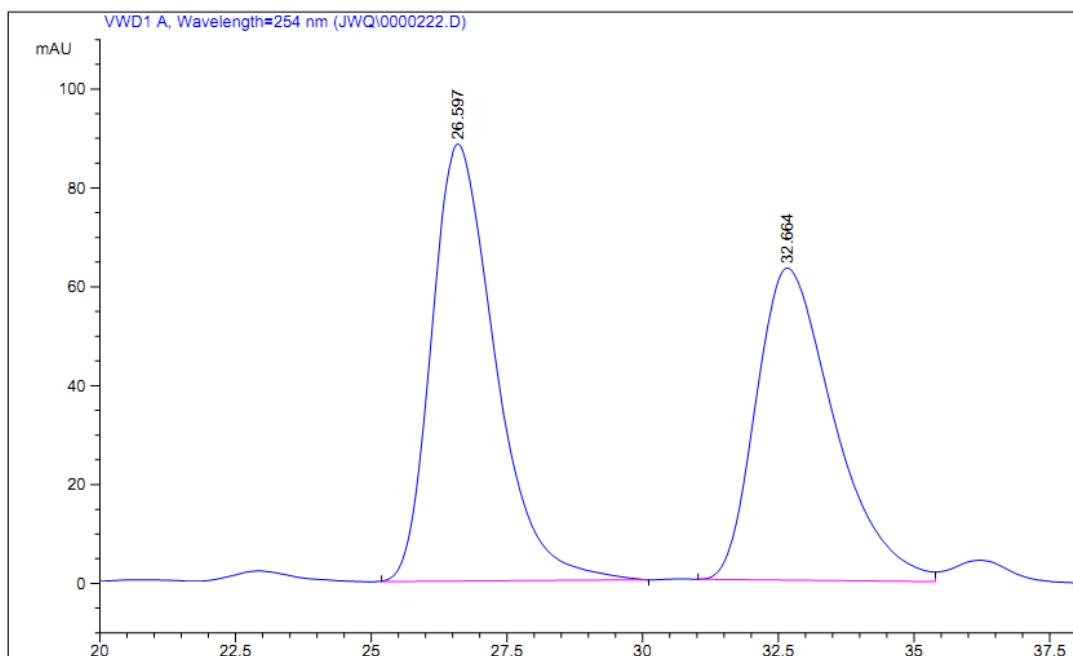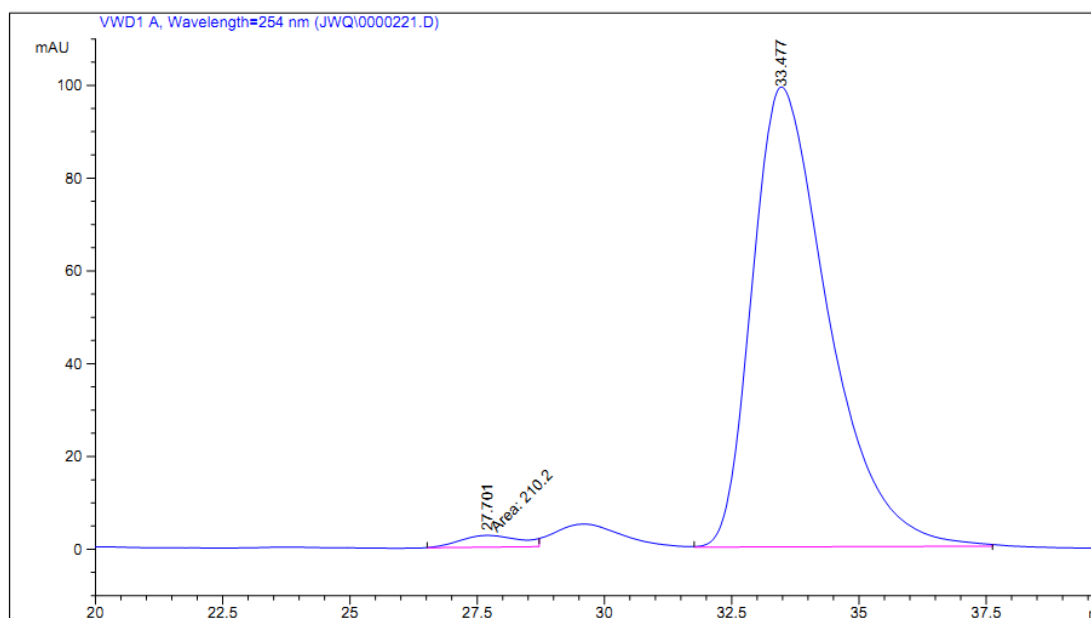

| Peak # | RetTime [min] | Type | Width [min] | Area mAU*s | Height [mAU] | Area %  |
|--------|---------------|------|-------------|------------|--------------|---------|
| 1      | 27.701        | MM   | 1.3816      | 210.20045  | 2.53563      | 1.9983  |
| 2      | 33.477        | BB   | 1.6123      | 1.03086e4  | 99.12168     | 98.0017 |

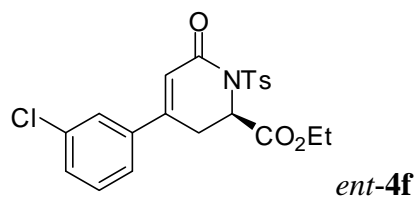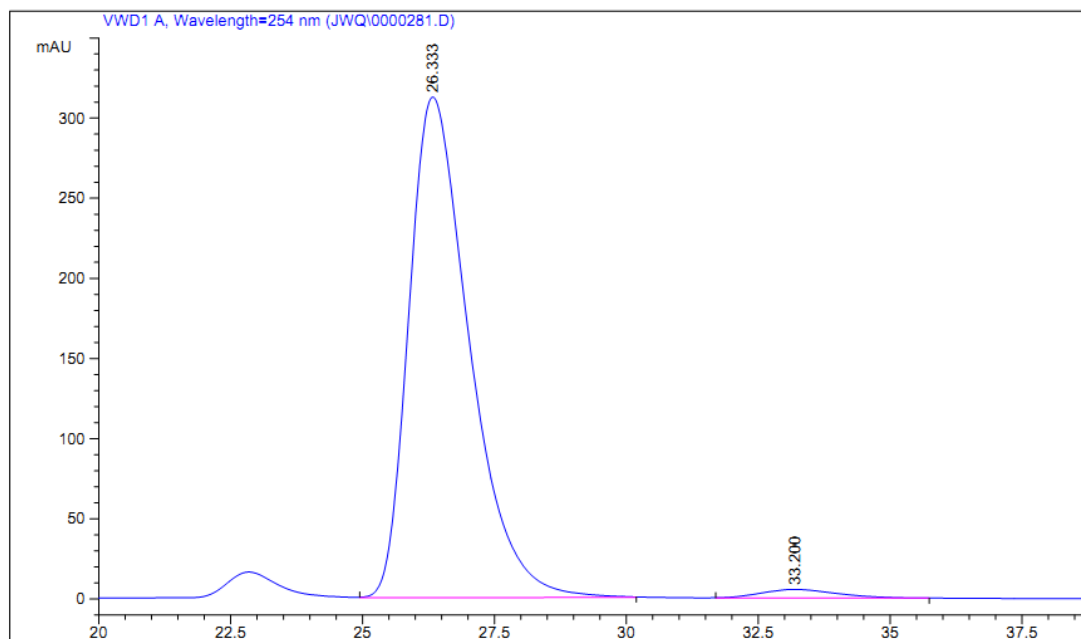

| Peak # | RetTime [min] | Type | Width [min] | Area mAU *s | Height [mAU] | Area %  |
|--------|---------------|------|-------------|-------------|--------------|---------|
| 1      | 26.333        | BB   | 1.2114      | 2.48652e4   | 312.28937    | 97.9222 |
| 2      | 33.200        | BB   | 1.4650      | 527.61591   | 5.32345      | 2.0778  |

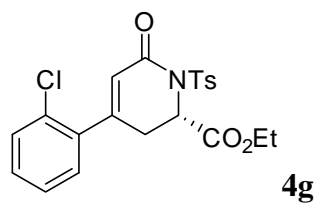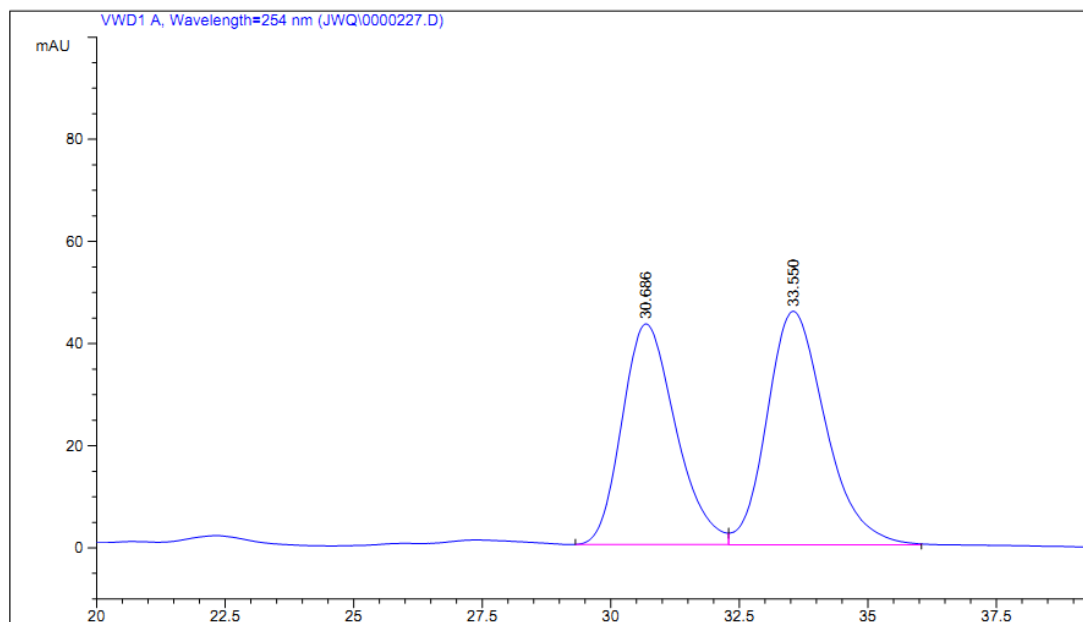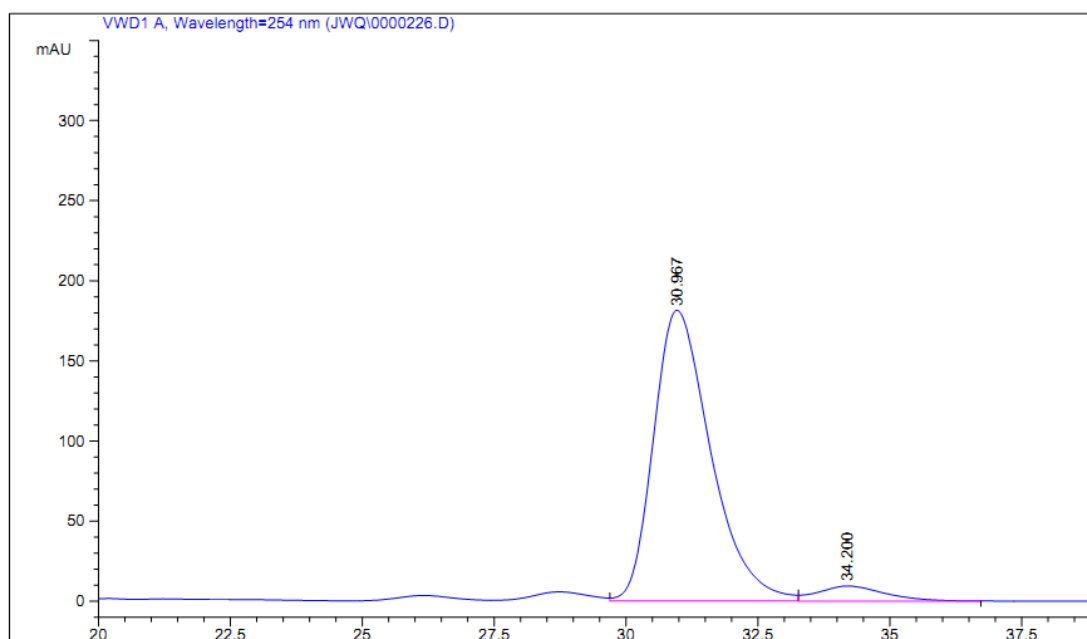

| Peak # | RetTime [min] | Type | Width [min] | Area mAU *s | Height [mAU] | Area %  |
|--------|---------------|------|-------------|-------------|--------------|---------|
| 1      | 30.967        | VV   | 1.1479      | 1.36866e4   | 181.45776    | 94.3134 |
| 2      | 34.200        | VB   | 1.3078      | 825.22620   | 9.36277      | 5.6866  |

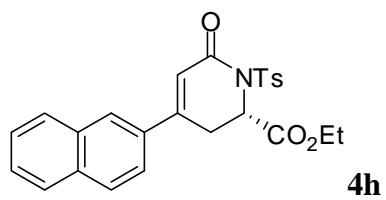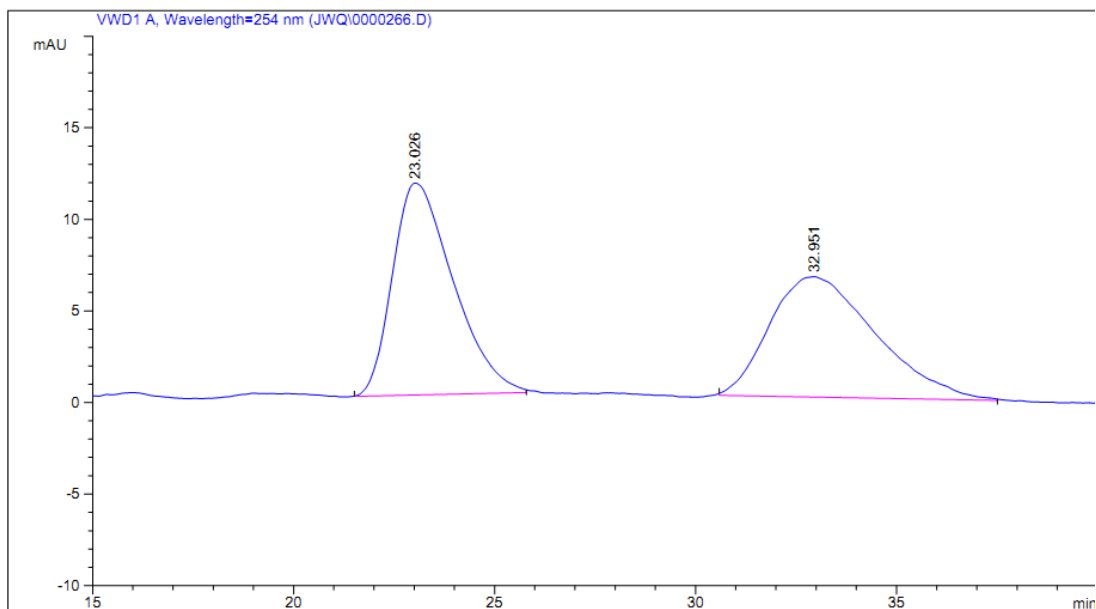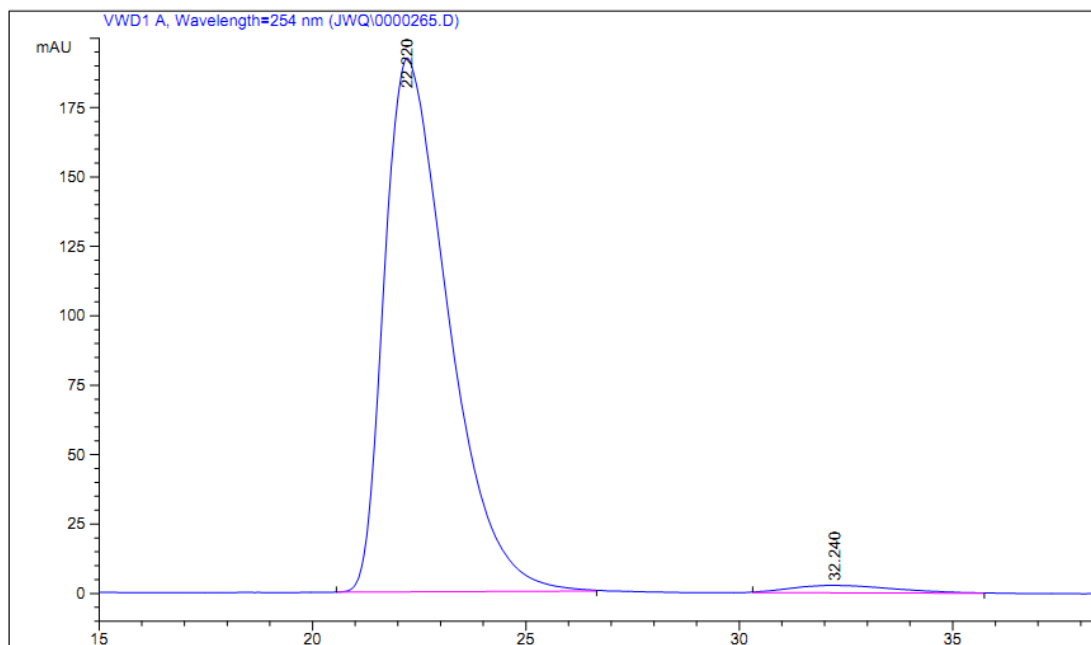

| Peak # | RetTime [min] | Type | Width [min] | Area mAU *s | Height [mAU] | Area %  |
|--------|---------------|------|-------------|-------------|--------------|---------|
| 1      | 22.220        | BB   | 1.5186      | 2.00410e4   | 192.31256    | 97.8396 |
| 2      | 32.240        | BB   | 1.9864      | 442.53561   | 2.66158      | 2.1604  |

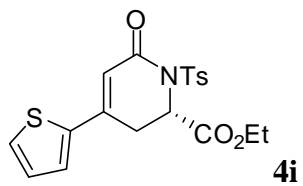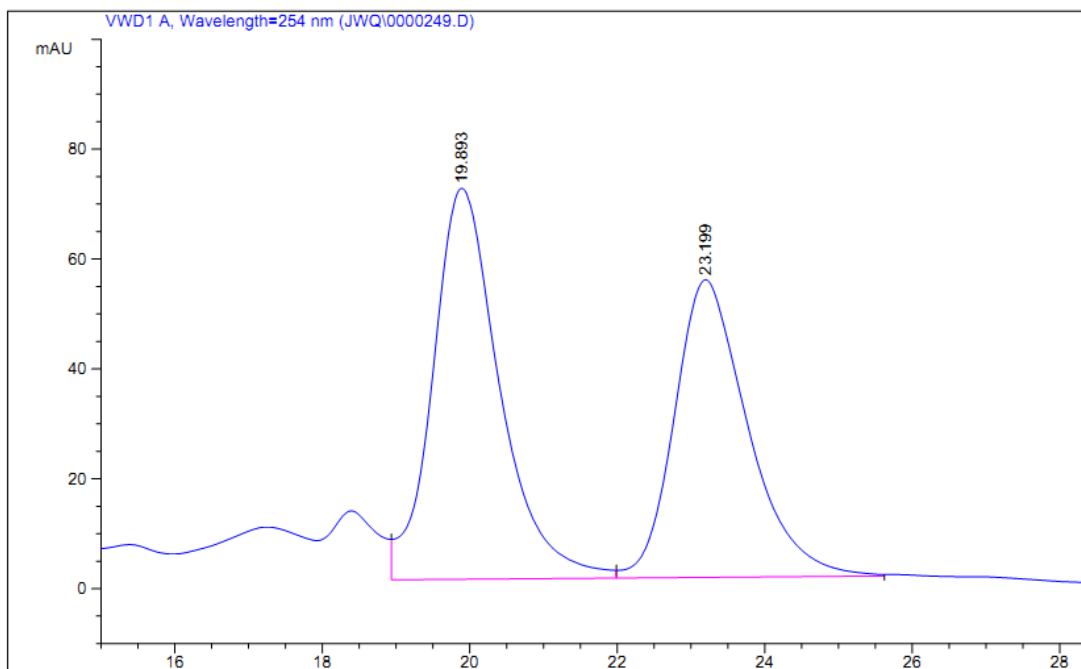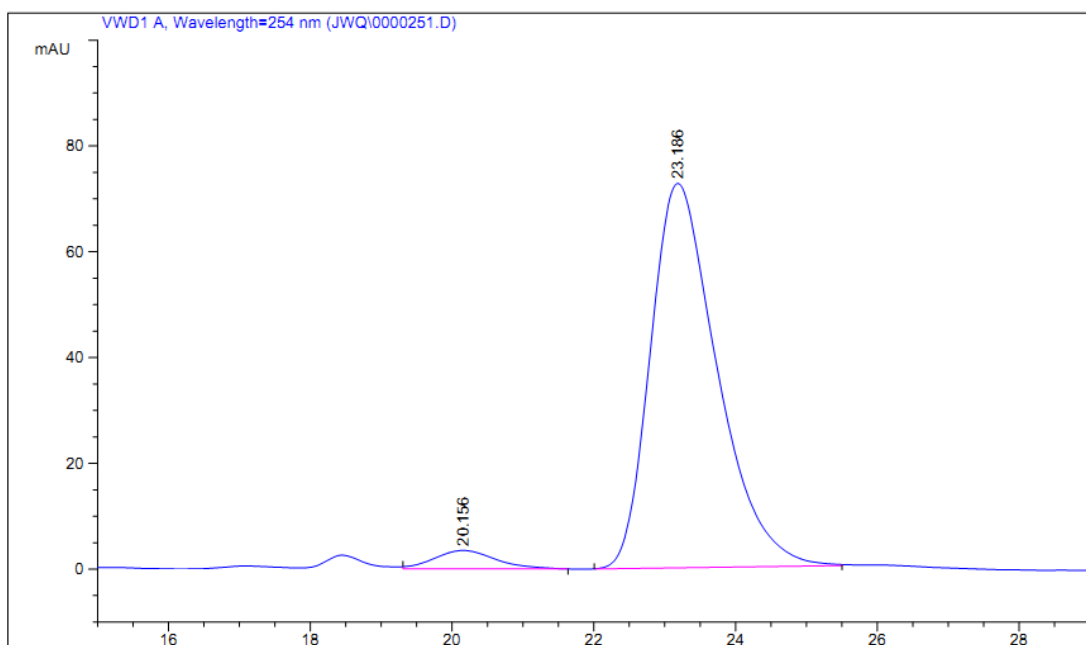

| Peak # | RetTime [min] | Type | Width [min] | Area mAU *s | Height [mAU] | Area %  |
|--------|---------------|------|-------------|-------------|--------------|---------|
| 1      | 20.156        | BB   | 0.9230      | 210.29291   | 3.49620      | 4.2457  |
| 2      | 23.186        | BB   | 0.9859      | 4742.82471  | 72.64774     | 95.7543 |

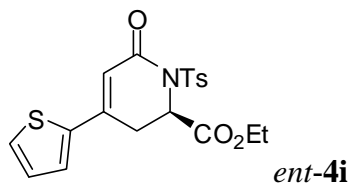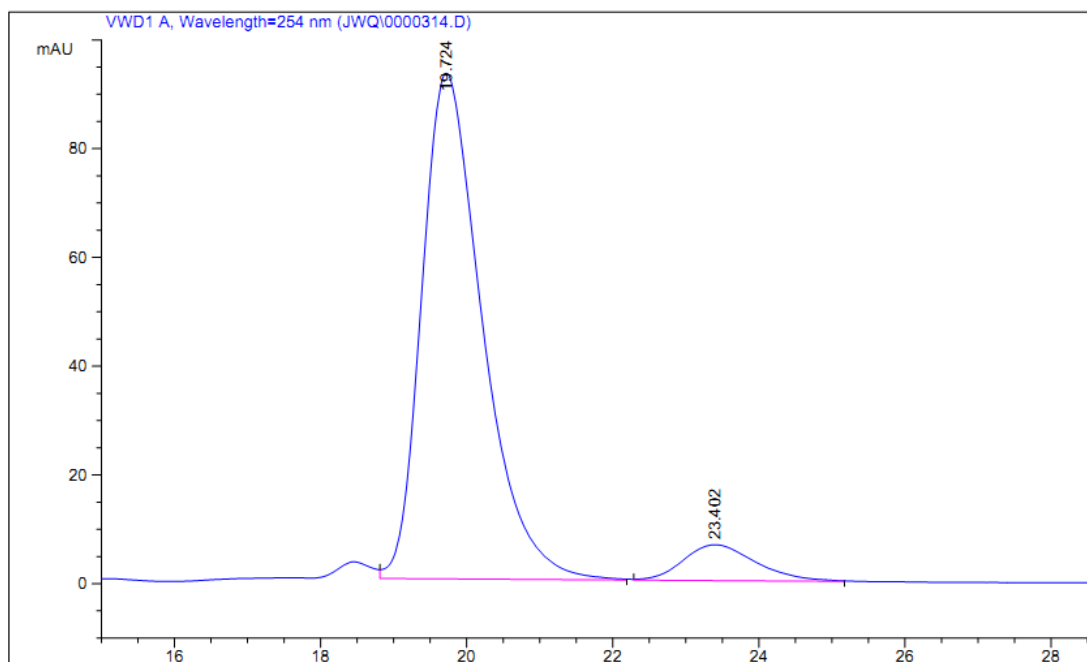

| Peak # | RetTime [min] | Type | Width [min] | Area mAU *s | Height [mAU] | Area %  |
|--------|---------------|------|-------------|-------------|--------------|---------|
| 1      | 19.724        | VB   | 0.8872      | 5354.57813  | 92.99741     | 92.2095 |
| 2      | 23.402        | BB   | 1.0653      | 452.39389   | 6.59505      | 7.7905  |

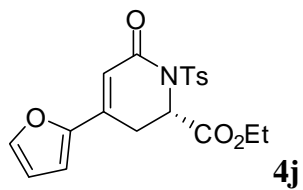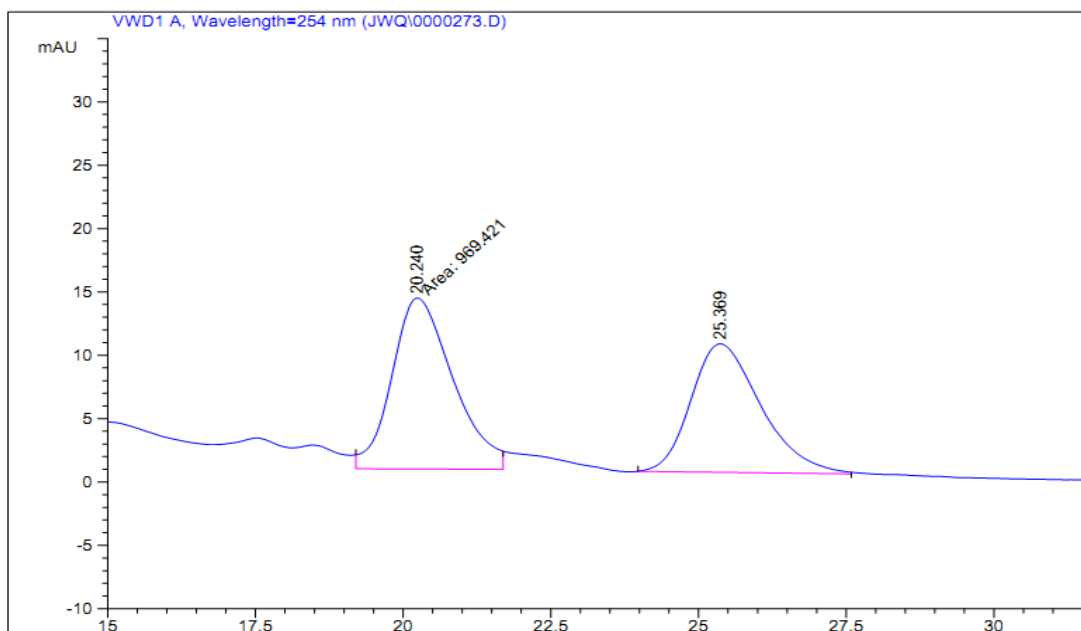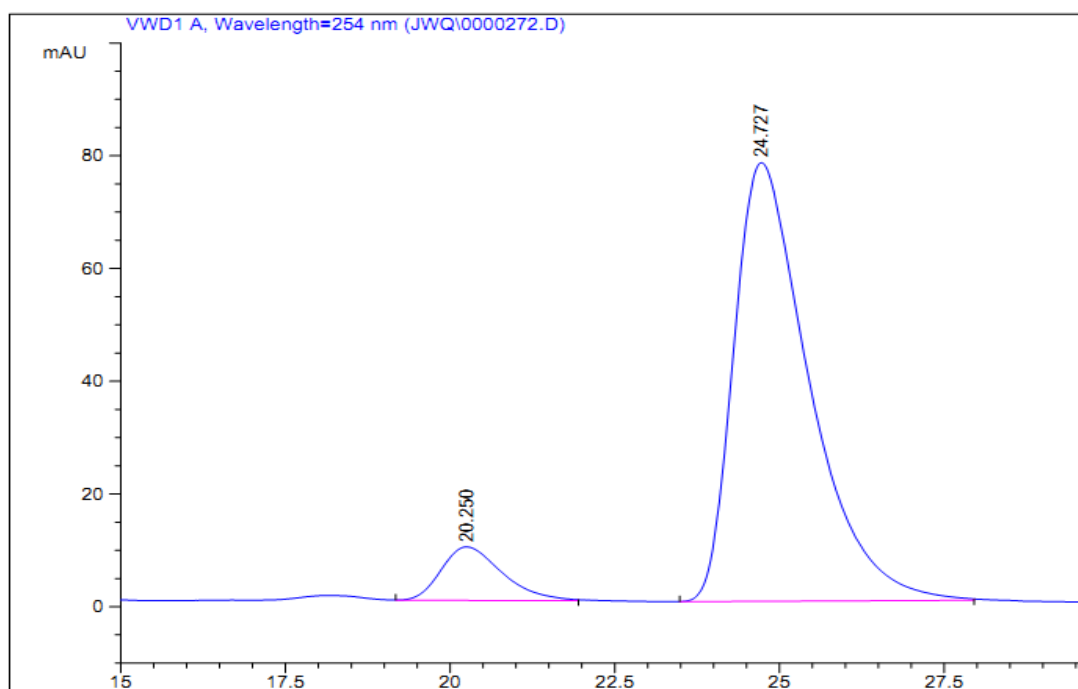

| Peak # | RetTime [min] | Type | Width [min] | Area mAU*s | Height [mAU] | Area %  |
|--------|---------------|------|-------------|------------|--------------|---------|
| 1      | 20.250        | VB   | 0.9818      | 609.67859  | 9.49857      | 8.9681  |
| 2      | 24.727        | BB   | 1.2045      | 6188.63574 | 77.81319     | 91.0319 |



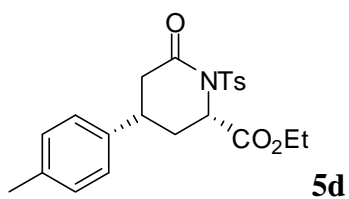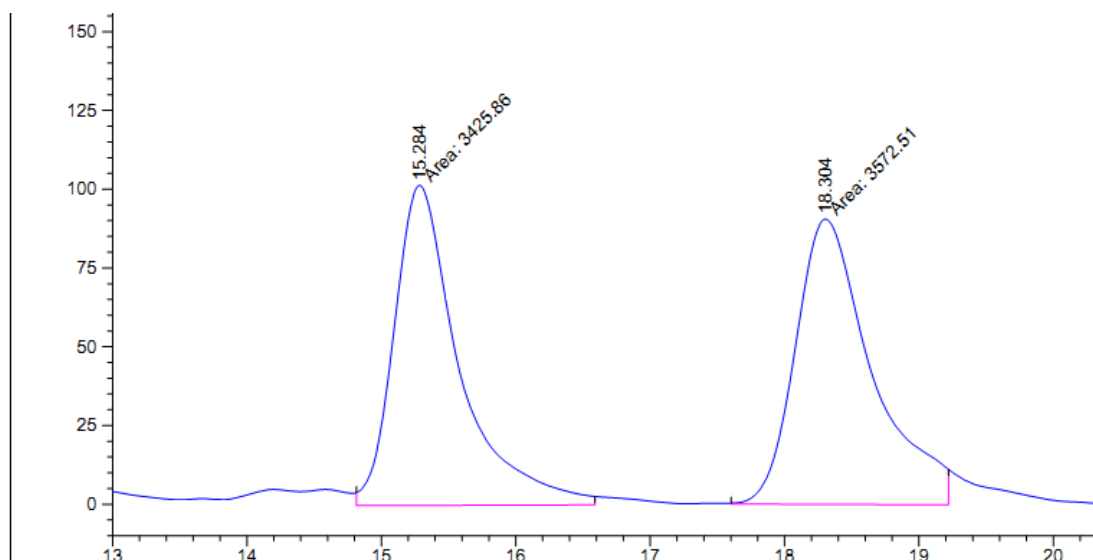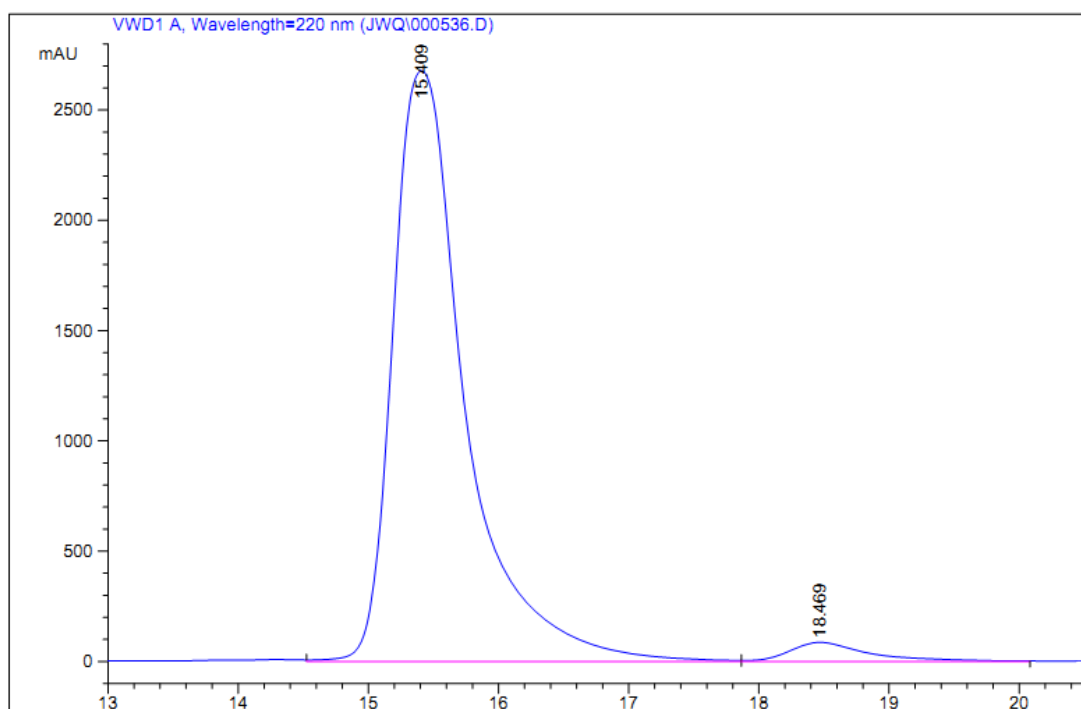

| Peak # | RetTime [min] | Type | Width [min] | Area mAU *s | Height [mAU] | Area %  |
|--------|---------------|------|-------------|-------------|--------------|---------|
| 1      | 15.409        | VV   | 0.5797      | 1.03695e5   | 2679.12549   | 96.4562 |
| 2      | 18.469        | VV   | 0.6316      | 3809.75464  | 87.78214     | 3.5438  |

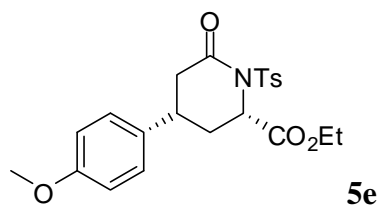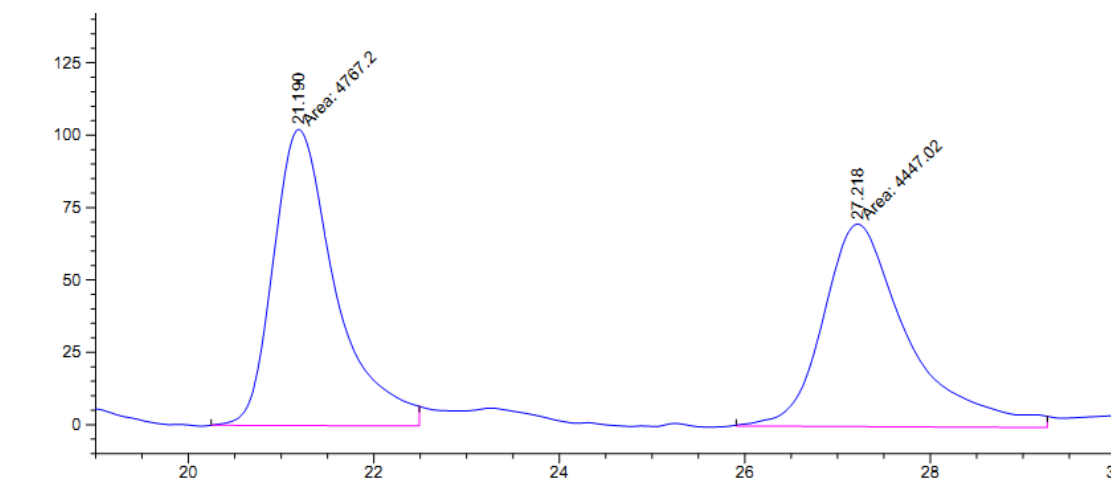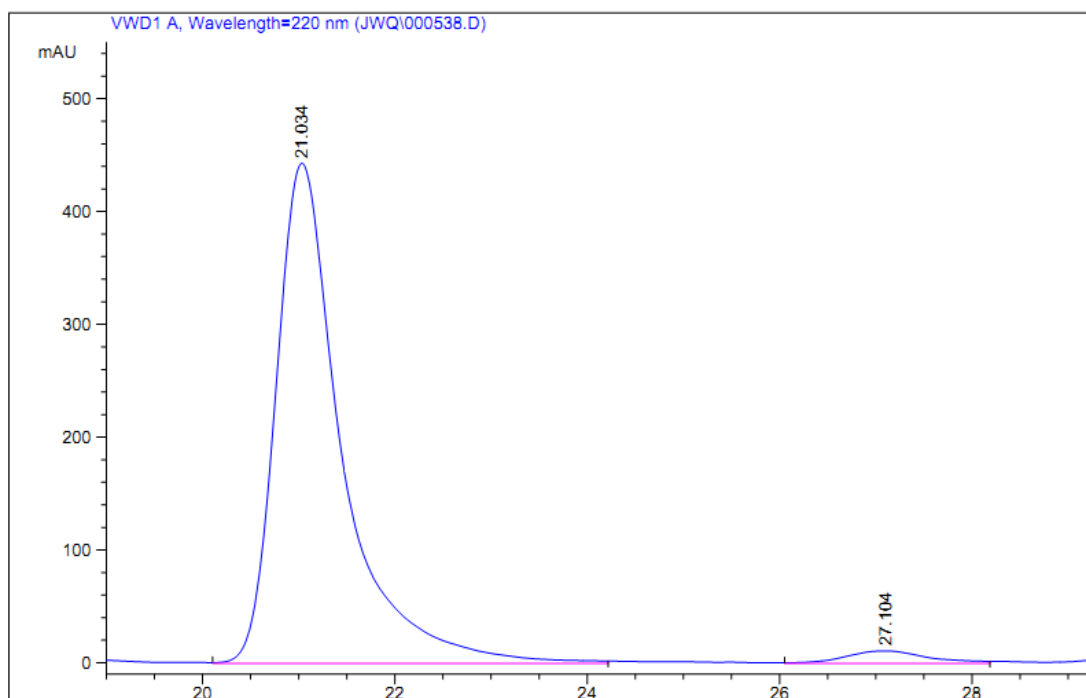

| Peak # | RetTime [min] | Type | Width [min] | Area mAU *s | Height [mAU] | Area %  |
|--------|---------------|------|-------------|-------------|--------------|---------|
| 1      | 21.034        | VV   | 0.7028      | 2.11791e4   | 443.43176    | 96.8659 |
| 2      | 27.104        | VV   | 0.9050      | 685.24738   | 11.16944     | 3.1341  |

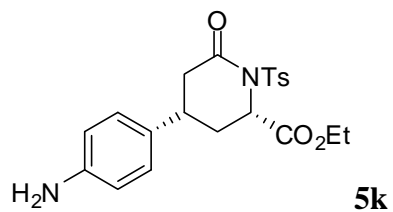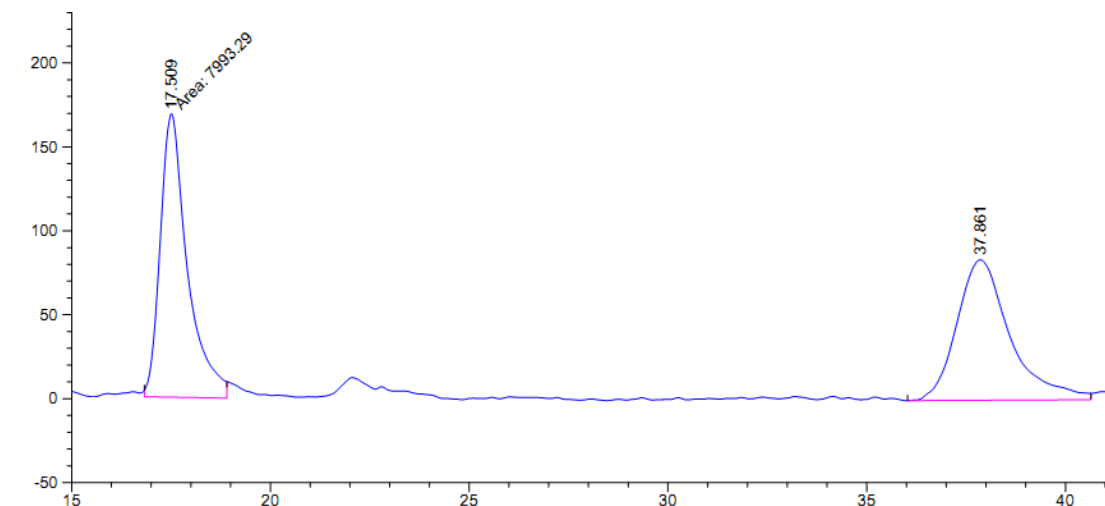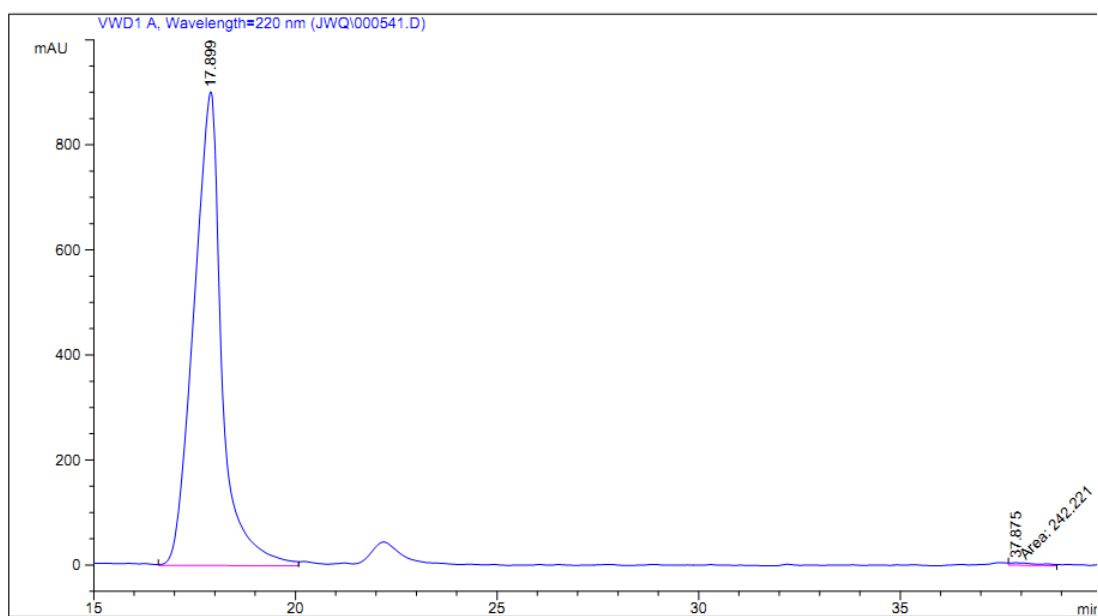

| Peak # | RetTime [min] | Type | Width [min] | Area mAU *s | Height [mAU] | Area %  |
|--------|---------------|------|-------------|-------------|--------------|---------|
| 1      | 17.899        | VV   | 0.7344      | 4.35027e4   | 902.05725    | 99.4463 |
| 2      | 37.875        | MM   | 0.8844      | 242.22084   | 4.56452      | 0.5537  |

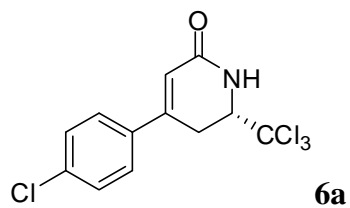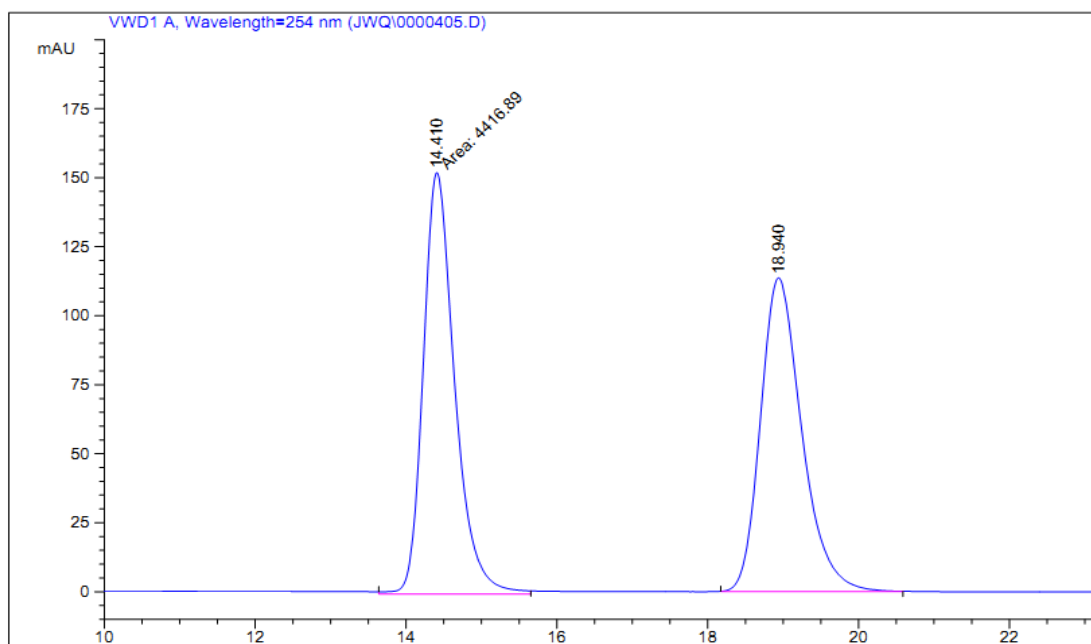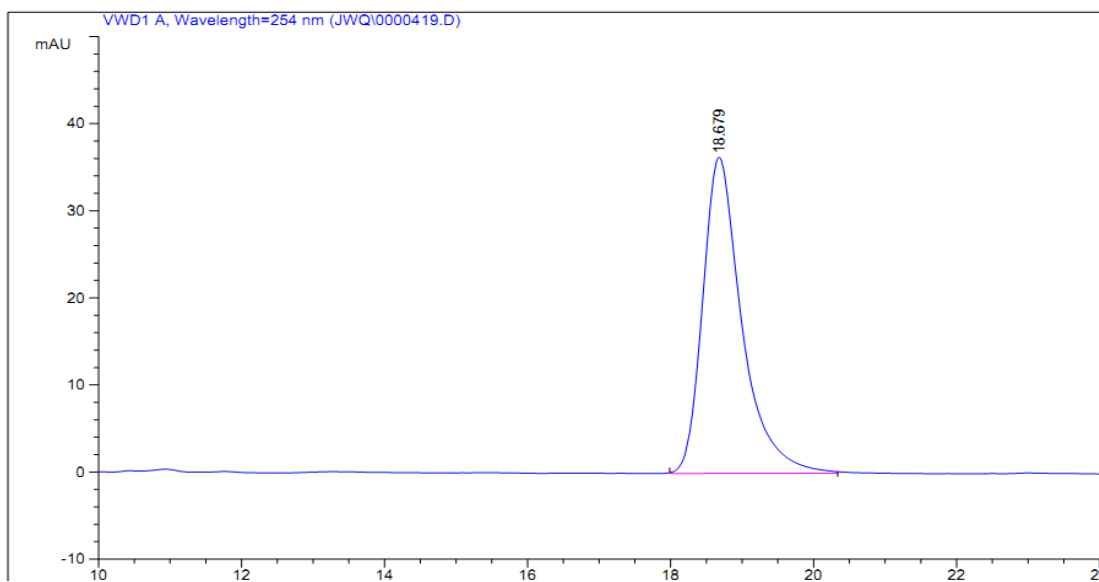

| Peak # | RetTime [min] | Type | Width [min] | Area mAU *s | Height [mAU] | Area %   |
|--------|---------------|------|-------------|-------------|--------------|----------|
| 1      | 18.679        | BB   | 0.5680      | 1376.66724  | 36.26997     | 100.0000 |

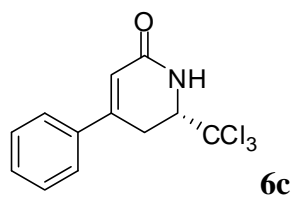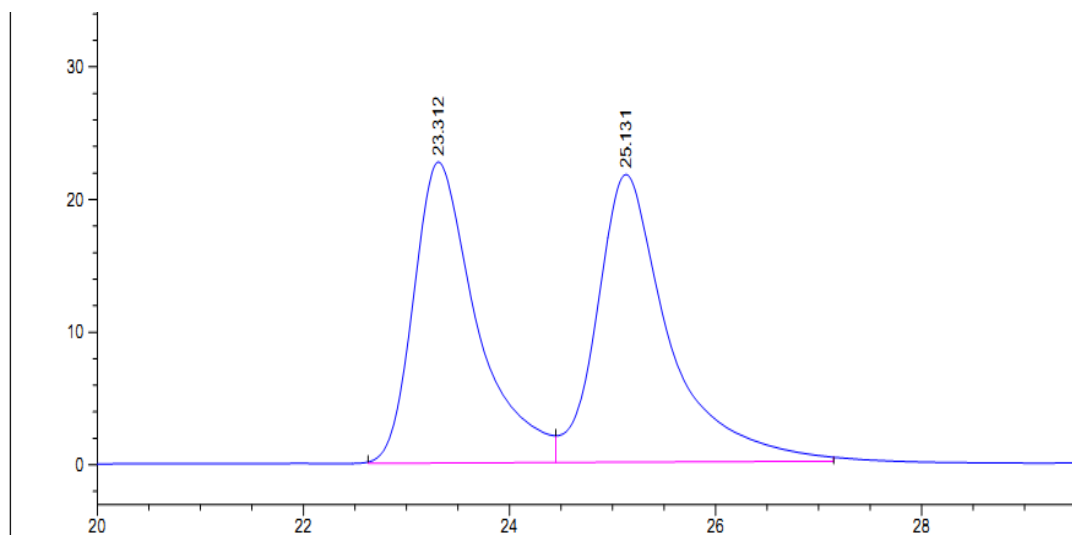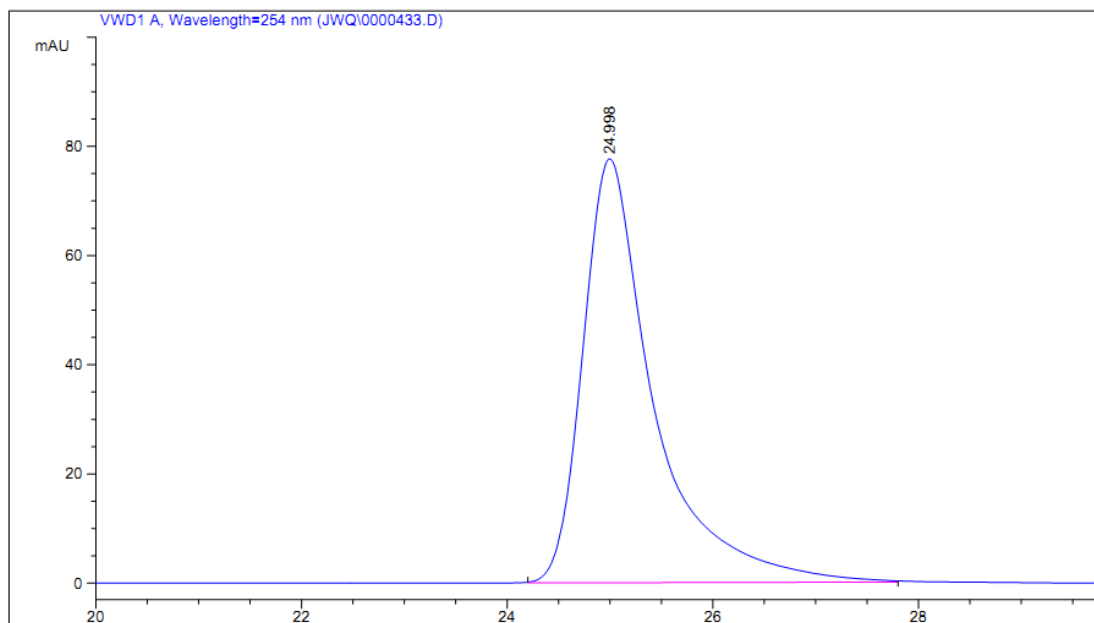

| Peak # | RetTime [min] | Type | Width [min] | Area mAU *s | Height [mAU] | Area %   |
|--------|---------------|------|-------------|-------------|--------------|----------|
| 1      | 24.998        | BB   | 0.7017      | 3718.08691  | 77.59993     | 100.0000 |

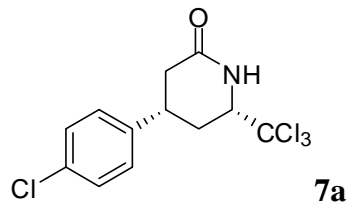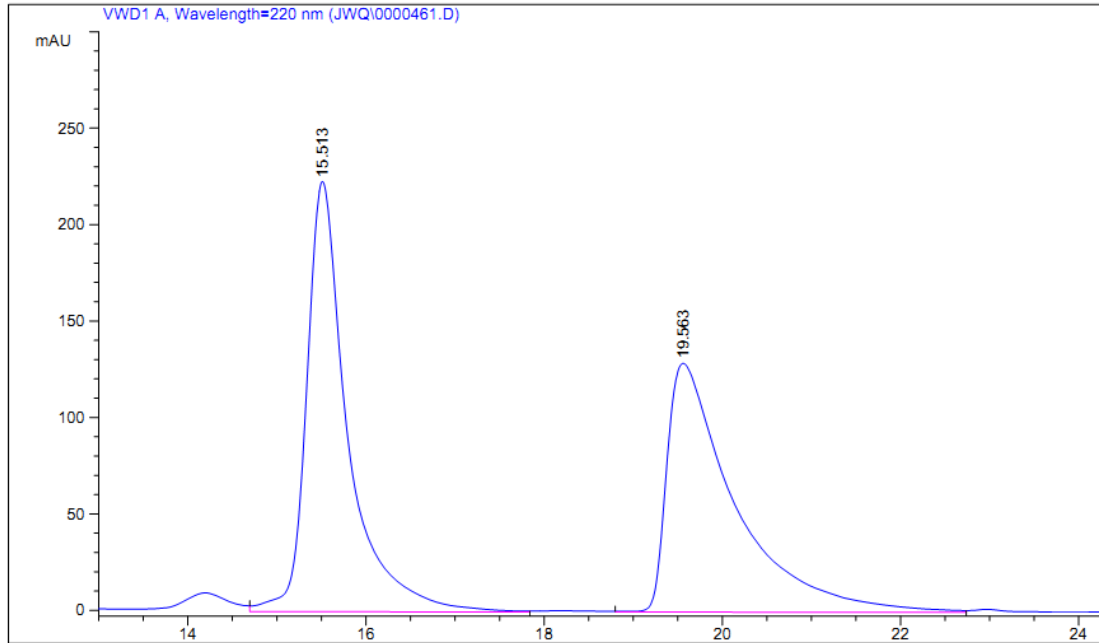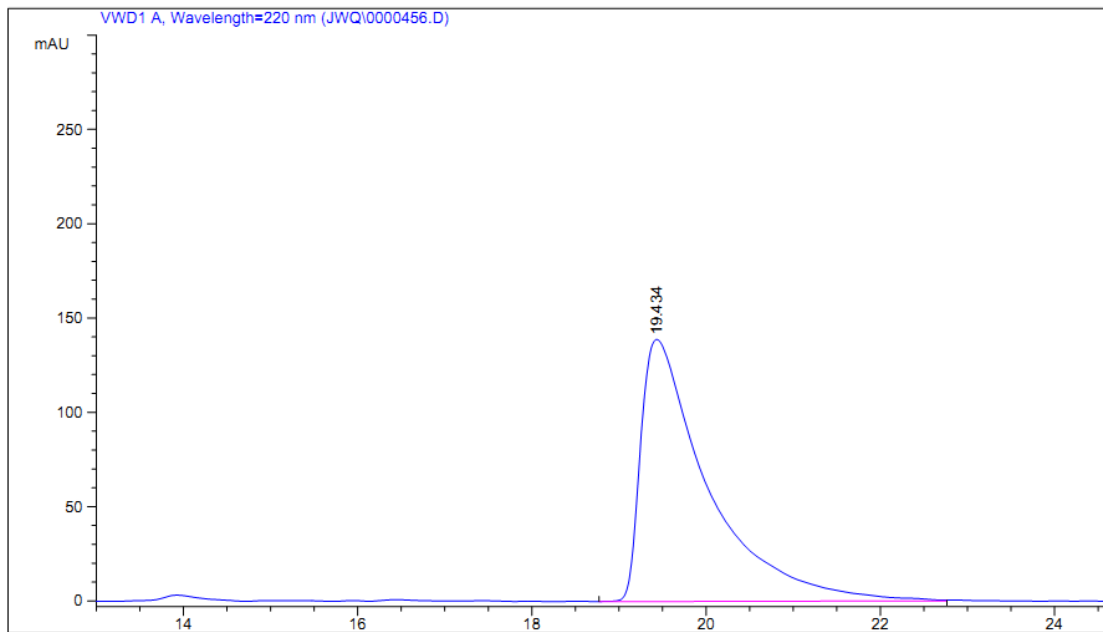

| Peak # | RetTime [min] | Type | Width [min] | Area mAU *s | Height [mAU] | Area %   |
|--------|---------------|------|-------------|-------------|--------------|----------|
| 1      | 19.434        | VB   | 0.7575      | 7462.21240  | 138.96172    | 100.0000 |

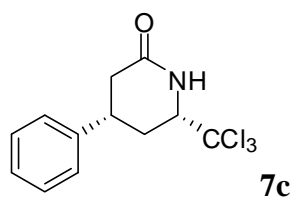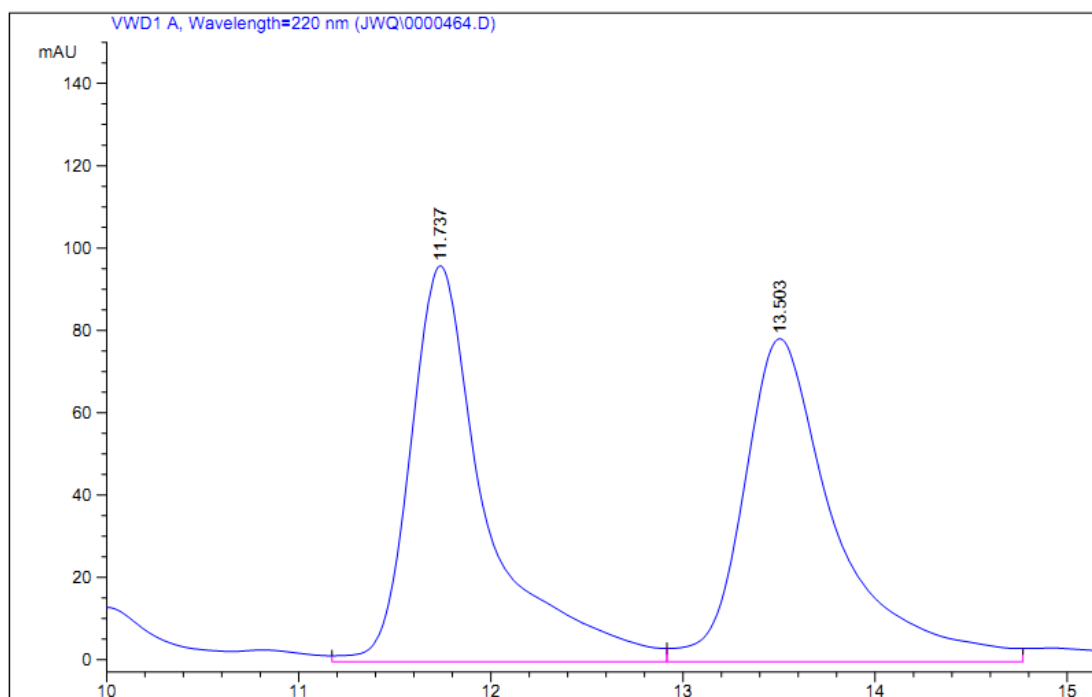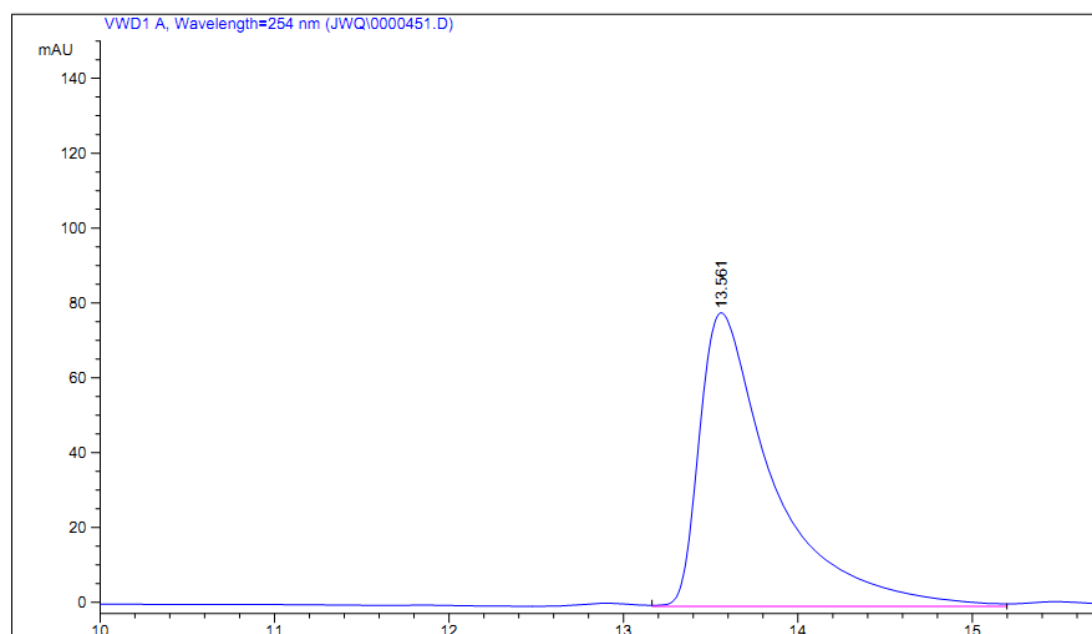

| Peak # | RetTime [min] | Type | Width [min] | Area mAU *s | Height [mAU] | Area %   |
|--------|---------------|------|-------------|-------------|--------------|----------|
| 1      | 13.561        | VV   | 0.4244      | 2303.67847  | 78.38393     | 100.0000 |

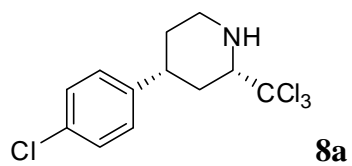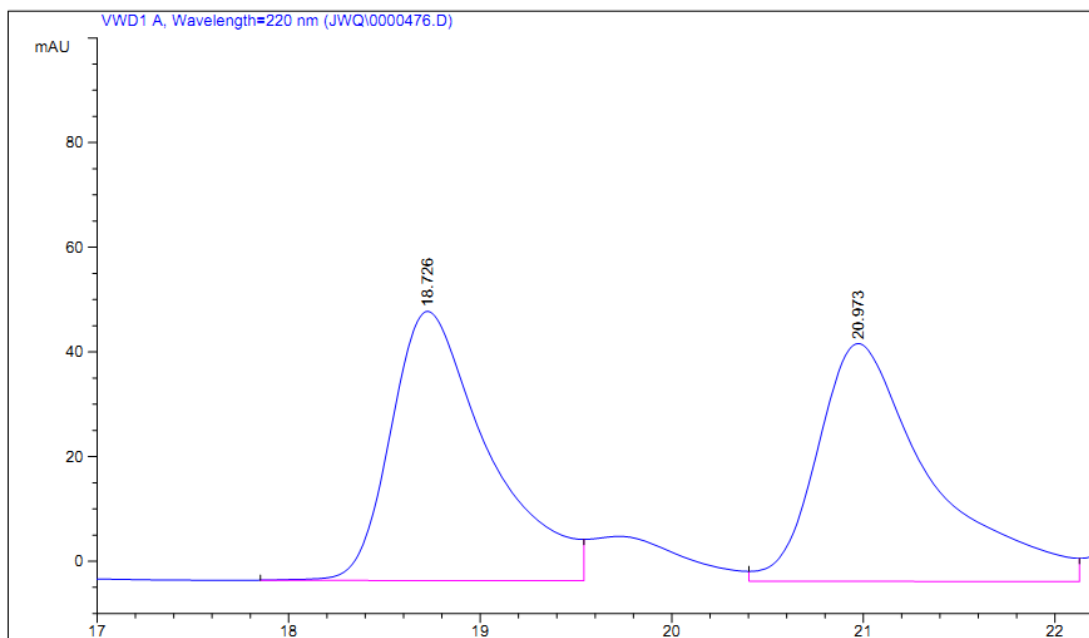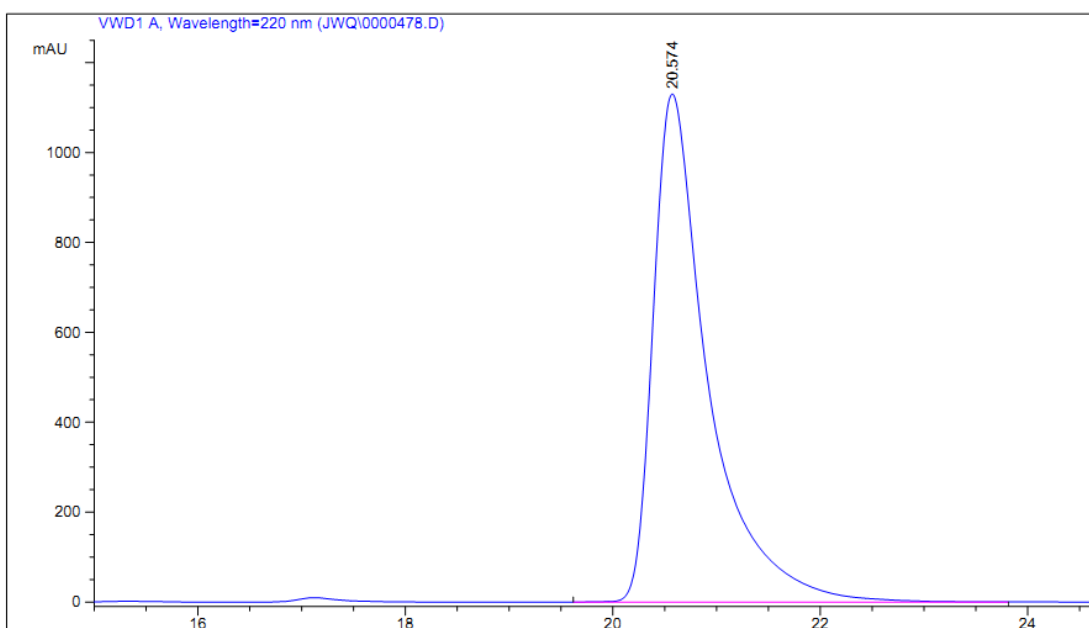



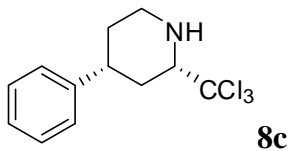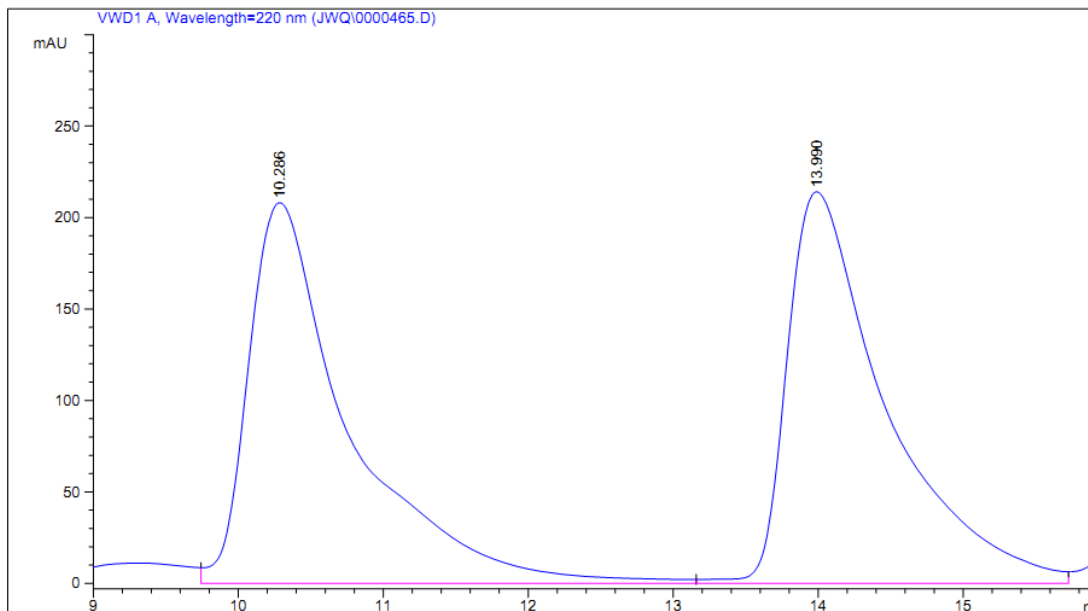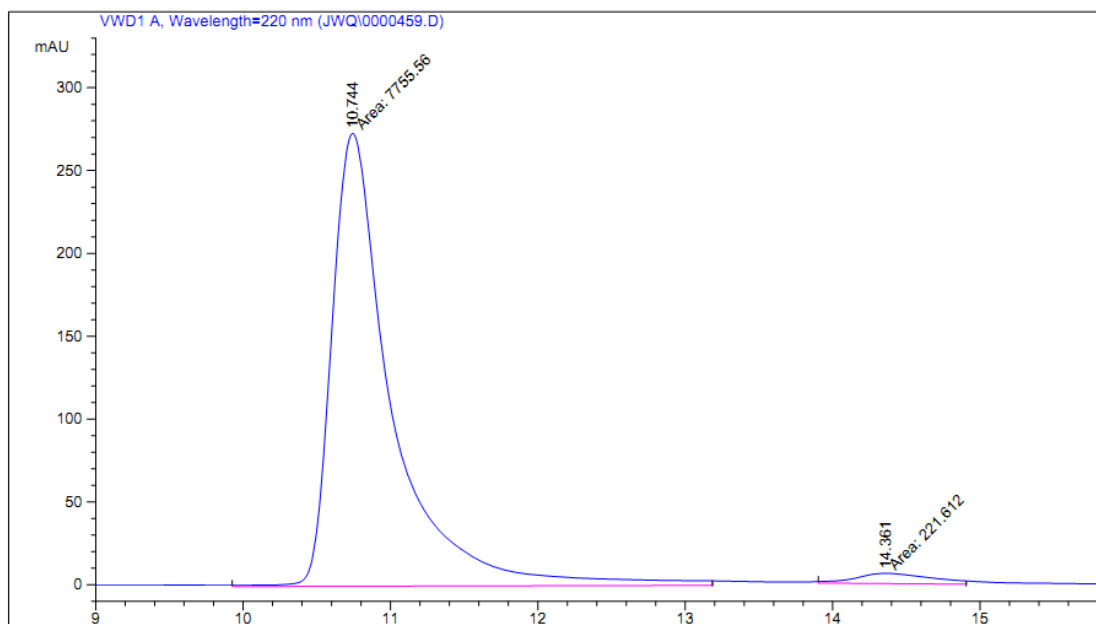

| Peak # | RetTime [min] | Type | Width [min] | Area mAU *s | Height [mAU] | Area %  |
|--------|---------------|------|-------------|-------------|--------------|---------|
| 1      | 10.744        | MM   | 0.4727      | 7755.56494  | 273.44739    | 97.2219 |
| 2      | 14.361        | MM   | 0.5927      | 221.61246   | 6.23153      | 2.7781  |

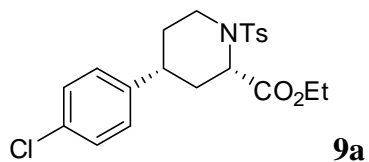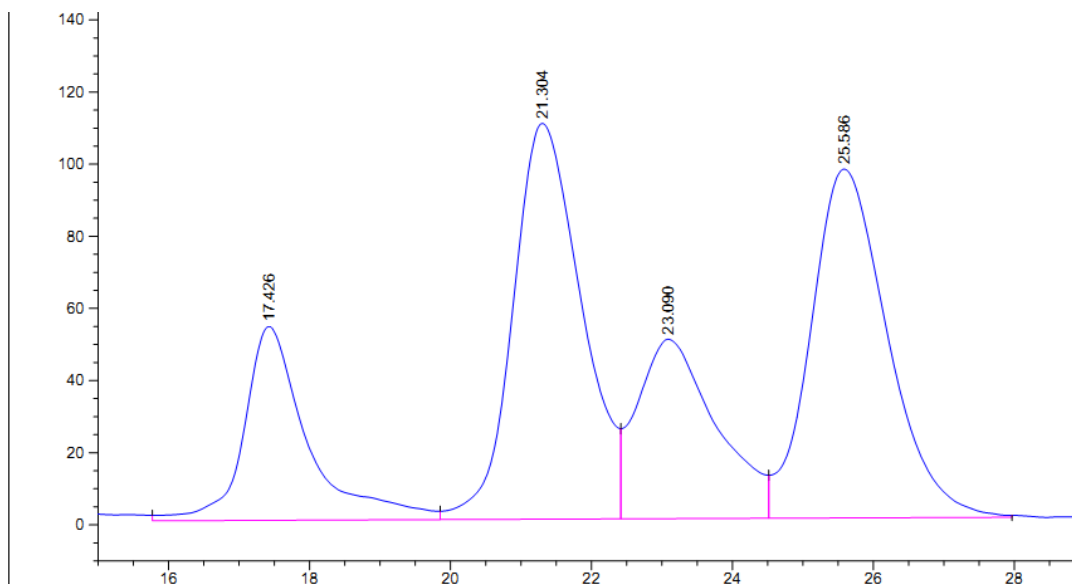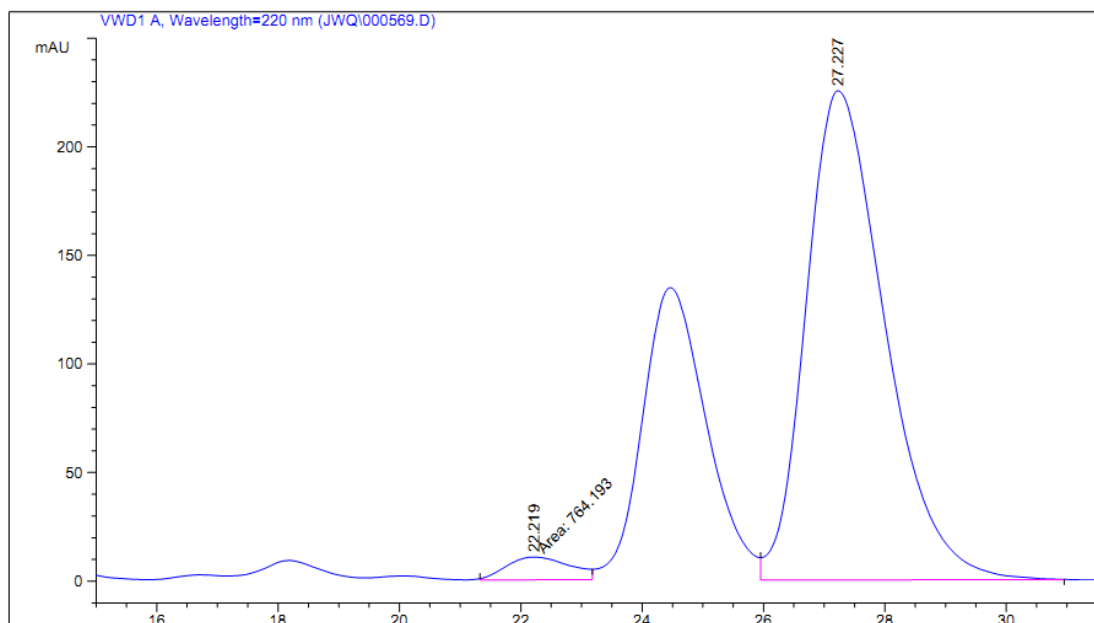

| Peak # | RetTime [min] | Type | Width [min] | Area mAU *s | Height [mAU] | Area %  |
|--------|---------------|------|-------------|-------------|--------------|---------|
| 1      | 22.219        | MM   | 1.2175      | 764.19293   | 10.46087     | 3.6253  |
| 2      | 27.227        | VB   | 1.3739      | 2.03151e4   | 225.27350    | 96.3747 |

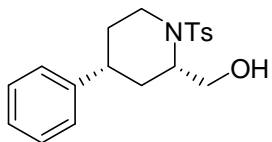

**11c**

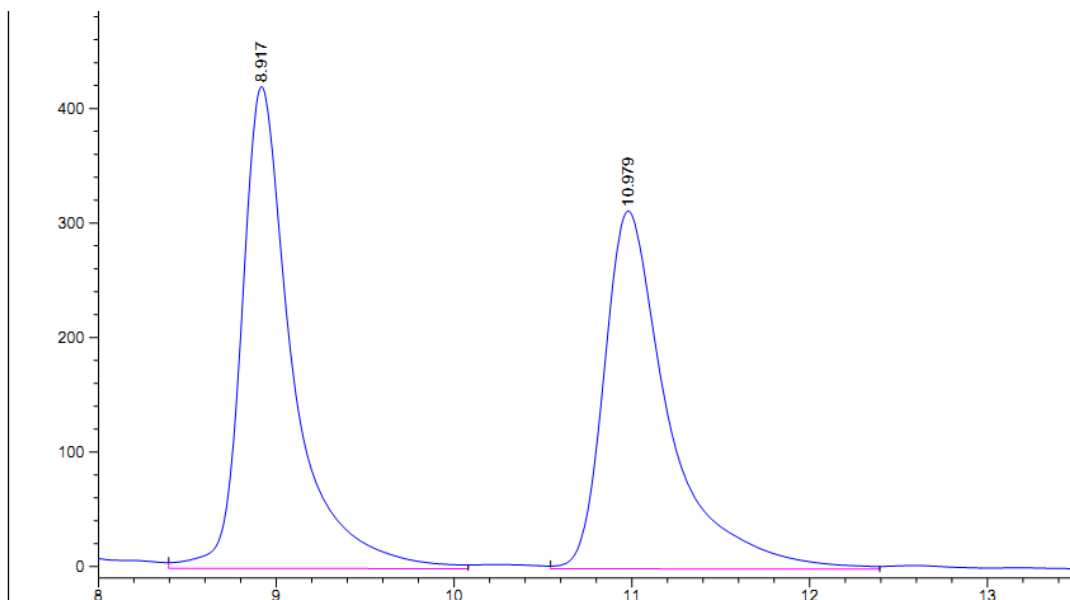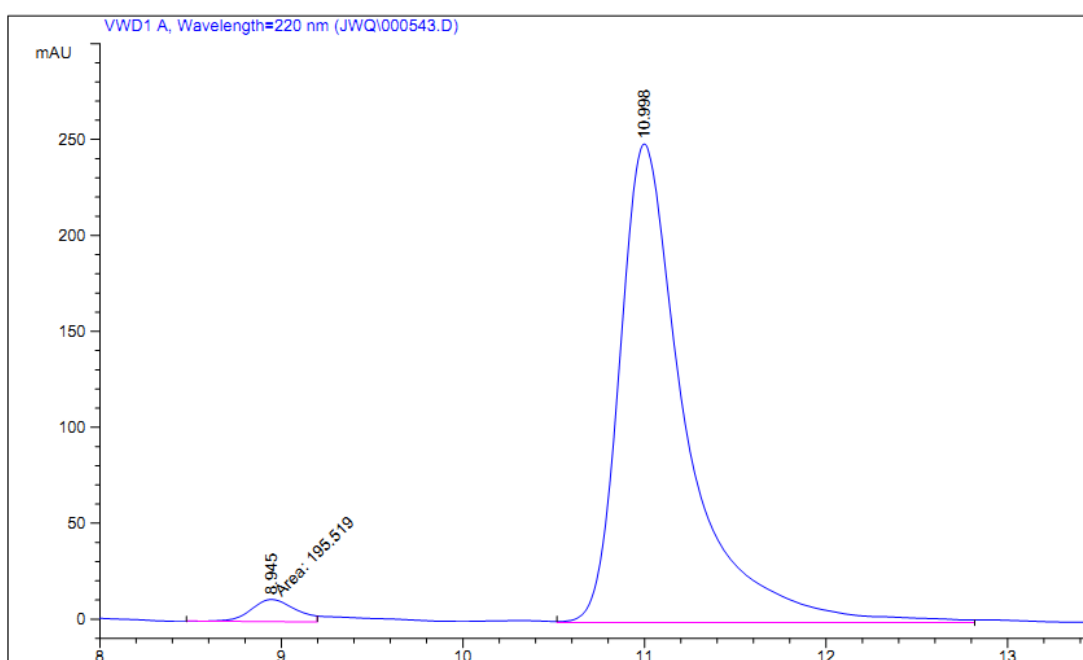

| Peak # | RetTime [min] | Type | Width [min] | Area mAU *s | Height [mAU] | Area %  |
|--------|---------------|------|-------------|-------------|--------------|---------|
| 1      | 8.945         | MM   | 0.2818      | 195.51938   | 11.56259     | 3.0057  |
| 2      | 10.998        | VV   | 0.3680      | 6309.34473  | 249.31384    | 96.9943 |
